1     **Yield maintenance under drought is orchestrated by the *qDTY12.1*-encoded**  
2     ***DECUSSATE* gene of rice through a network with other flowering-associated**  
3                   **genes across the genetic background**

4

5

6             Jacobco Sanchez<sup>1+</sup>, Pushpinder Pal Kaur<sup>1+</sup>, Isaiah C.M. Pabuayon<sup>1+</sup>,

7     Naga Bhushana Rao Karampudi<sup>1</sup>, Ai Kitazumi<sup>1</sup>, Nitika Sandhu<sup>2#</sup>, Margaret Catolos<sup>2</sup>,

8                   Arvind Kumar<sup>2##</sup>, Benildo G. de los Reyes<sup>1\*</sup>

9

10

11    <sup>1</sup>Department of Plant and Soil Science, Texas Tech University, Lubbock, USA

12    <sup>2</sup>International Rice Research Institute, Los Banos, Philippines

13    <sup>#</sup>Current address: School of Agricultural Biotechnology, Punjab Agricultural

14    University, Ludhiana, India

15    <sup>##</sup>Current address: International Crops Research Institute for the Semi-Arid Tropics,

16    Petancheru, India

17    <sup>\*</sup>These authors contributed equally to this work

18    <sup>\*</sup>***Corresponding author: [benildo.reyes@ttu.edu](mailto:benildo.reyes@ttu.edu), 806-834-6421***

19

20    **Author Contributions**

21    JS and PPK analysed the processed transcriptome datasets and performed all

22    experiments in Arabidopsis. ICMP, NS and MC performed the drought experiments at

23    IRRI. AKi and ICMP generated and processed all raw RNA-Seq datasets. NBRK

24 performed the Propensity normalization and interpretation of RNA-Seq datasets. AKu  
25 and NS developed the introgression lines and established the comparative genotypic  
26 panel used in the study. BGDR, JS, PPK and ICMP interpreted the biological  
27 implications of the results. BGDR and JS wrote the manuscript with contributions  
28 from PPK and ICMP. BGDR is the principal investigator of the research grant and  
29 conceptualized the whole project.  
30

31 **Abstract**

32           Introgression of major-effect QTLs is an important component of rice breeding  
33 for yield-retention under drought. While largely effective, the maximum potentials of  
34 such QTLs have not been consistent across genetic backgrounds. We hypothesized  
35 that synergism or antagonism with additive-effect peripheral genes across the  
36 background could either enhance or undermine the QTL effects. To elucidate the  
37 molecular underpinnings of such interaction, we dissected *qDTY12.1* synergy with  
38 numerous peripheral genes in context of network rewiring effects. By integrative  
39 transcriptome profiling and network modeling, we identified the *DECUSSATE*  
40 (*OsDEC*) within *qDTY12.1* as the core of the synergy and shared by two sibling  
41 introgression lines in IR64 genetic background, *i.e.*, LPB (low-yield penalty) and HPB  
42 (high-yield penalty). *OsDEC* is expressed in flag leaves and induced by progressive  
43 drought at booting stage in LPB but not in HPB. The unique *OsDEC* signature in LPB  
44 is coordinated with 35 upstream and downstream peripheral genes involved in floral  
45 development through the cytokinin signaling pathway, which are lacking in HPB.  
46 Results further support the differential network rewiring effects through genetic  
47 coupling-uncoupling between *qDTY12.1* and other upstream and downstream  
48 peripheral genes across the distinct genetic backgrounds of LPB and HPB . We  
49 propose that the functional *DEC*-network in LPB defines a mechanism for early  
50 flowering as a means for avoiding the depletion of photosynthate needed for  
51 reproductive growth due to drought. Its impact on yield-retention is likely through the  
52 timely establishment of stronger source-sink dynamics that sustains a robust  
53 reproductive transition under drought.

## 54 **Author summary**

55           While the Green Revolution of the 1960's significantly increased rice grain  
56 yields through the creation of high-yielding varieties for high input systems, current  
57 marginal climates pose a significant challenge for providing consistent yield. In rice  
58 growing regions of the world, drought affects the livelihood of small-scale and  
59 subsistence farmers by inflicting significant yield penalties to their production  
60 systems. Breeding of next-generation rice varieties with optimal balance of  
61 survivability and productivity traits will be key to providing consistent yields year to  
62 year. Within this paradigm, the use of large effect QTLs such as *qDTY12.1* to  
63 improve yield retention under drought have been largely successful. By integrating  
64 the use of high resolution transcriptome datasets with a focused biological  
65 interrogation of agronomic results from this and previous studies, we uncovered a  
66 putative functional genetic network, anchored by the *DECUSSATE* gene (*OsDEC*)  
67 within *qDTY12.1*, that effectively minimizes drought penalties to yield by driving  
68 cellular processes that culminate in timely flowering that maximizes the use of  
69 photosynthetic sources for efficient reproductive transition and ultimately seed  
70 development. Our study further illuminates the *qDTY12.1* function and speaks to the  
71 misconception that *qDTY* introgression alone is sufficient for providing consistently  
72 large positive effects to yield retention under reproductive stage drought.

73

74

75

76

## 77 **Introduction**

78           Through ideotype breeding, the Green Revolution created the modern high-  
79 yielding varieties of rice with morphological and physiological attributes optimal for  
80 environments with ample water and nutrients **[1–6]**. However, the increased  
81 incidence of erratic rainfall patterns, diminishing water resources, and depletion of  
82 arable lands paints the new reality at which crop production must be undertaken to  
83 ensure yield stability under increasing global food demands and steadily rising  
84 population. With this reality in mind, innovative and holistic paradigms in plant  
85 breeding will be critical to the development of the next generation of crop cultivars  
86 that can absorb this conglomeration of ecological factors while minimizing penalties  
87 to yield. The creation of new ideotypes with novel mechanisms that confer resilience  
88 to drought-prone environments for example, holds great promise for establishing an  
89 effective means for maximizing yield under sub-optimal conditions **[7,8]**.

90           With the reported drought-related yield losses in rice ranging from 18% to 97%  
91 **[9]**, robust approaches in breeding, like QTL introgression and pyramiding for  
92 example, become the most vital components of a holistic strategy for addressing the  
93 needs of subsistence rice farmers in regions that are highly prone to either periodic  
94 episodes of drought or persistent drought **[10–13]**. The discovery and subsequent  
95 pyramiding of large-effect QTLs that function at the reproductive stage, *i.e.*, *qDTYs*  
96 for yield maintenance under drought (**S1 Table**), have led to incremental but major  
97 improvements in the yield potential of many of the widely grown rice cultivars that  
98 regularly incur significant penalties due to reproductive-stage drought **[14–16]**.  
99 Among the most well-characterized and considered of very high importance to rice

100 breeding is the *qDTY12.1*, because of its more consistent effects in reducing the  
101 penalty to yield across growing environments [17–19]. Fine-mapping of *qDTY12.1* in  
102 the Way Rarem x Vandana derived population defined its boundaries within 3.1cM on  
103 the long-arm of chromosome-12, which is estimated to be about 1.554 Mbp with  
104 physical coordinates in the Nipponbare *RefSeq* between 15,848,736 bp to  
105 17,401,530 bp [20].

106 Initial attempts to understand the mechanisms by which *qDTY12.1* is able to  
107 impart such large positive effects as a ‘*yield QTL*’ have pointed to a number of  
108 candidate genes [21–23]. However, while the characterization of these genes  
109 provided important advances, much of the mechanisms that have been uncovered so  
110 far appeared to be involved in stress avoidance and physiological adjustments during  
111 vegetative growth, and not really in the cellular processes with direct significance to  
112 reproductive growth, source-sink partitioning, and/or grain development, which are  
113 more meaningful to yield maintenance [24–27]. For instance, a recent study showed  
114 the importance of the *qDTY12.1*-encoded *OsNAM<sub>12.1</sub>* transcription factor  
115 (*Os12g0477400*) in the regulation of root development and architecture as a  
116 mechanism of drought avoidance during vegetative growth [23]. Additionally, a  
117 meta-analysis of 53 grain yield-related QTLs identified six (6) loci within the meta-  
118 QTL (MQTL) on *qDTY12.1* that are not directly associated with yield processes [21].

119 Perhaps the most interesting aspect of *qDTY12.1* was the fact that this locus  
120 did not exhibit a positive effect on yield maintenance in its native genetic background  
121 (*i.e.*, original donor), which is the Indonesian upland cultivar Way Rarem (WR) [17].  
122 However, significant positive effects of the *qDTY12.1* in minimizing yield penalty

123 under drought were observed in recombinants with the Indian cultivar Vandana,  
124 which has drought tolerance at the vegetative stage but with high drought penalty to  
125 yield [17,28]. These seminal observations inspired the initial hypothesis that the full  
126 effects of *qDTY12.1* require some kind of synergy and complementation with other  
127 minor peripheral genes in the genetic background that cannot be identified at high  
128 statistical confidence by the resolution of QTL mapping [22]. Researchers have been  
129 trying to identify such network of genes either among the *qDTY12.1* genes  
130 themselves or across genetic backgrounds, but so far no truly significant leads apart  
131 from vegetative stage drought avoidance have been uncovered [24–27].

132 With the observations that some introgression derivatives of *qDTY12.1*  
133 exhibited consistent yield retention under drought, while others had not, the question  
134 was raised as to why the presence of the *qDTY12.1* allele of WR alone as facilitated  
135 by marker-assisted selection, would not be sufficient in providing the expected  
136 positive effects across different genetic backgrounds or even within similar genetic  
137 backgrounds [22]. We hypothesized that in specific derivatives carrying the same  
138 *qDTY12.1* allele from WR where the expected positive effects were not manifested,  
139 genetic recombination may have created some kind of coupling-uncoupling effects  
140 involving many other alleles in the genetic background that are peripheral but  
141 synergistic to *qDTY12.1* functions, with the *qDTY12.1* genes themselves acting as  
142 the core of the mechanism (*i.e.*, epistatic effects or network rewiring effects) [29,30].  
143 This hypothesis built its strength from the recently proposed *Omnigenic Theory*,  
144 which postulated that complex traits are controlled by not only a core set of loci with  
145 quantifiable effects, but also by a genome-wide cohort of other peripheral loci whose

146 individual effects are minute but their additive effects could either positively or  
147 negatively complement the core effects to account for a larger proportion of the total  
148 phenotypic variance **[31]**.

149 To dig deeper into the yield-related function of *qDTY12.1* while also  
150 addressing the coupling-uncoupling and network rewiring hypotheses, we  
151 investigated a minimal comparative panel established at the International Rice  
152 Research Institute (IRRI) that models the contrast between positive net gain and  
153 negative net gain from *qDTY12.1* effects across potentially contrasting combinations  
154 of peripheral alleles in similar genetic backgrounds **[32]**. This comparative panel is  
155 comprised of the cultivar Way Rarem (WR), the original donor of *qDTY12.1*, the  
156 drought-sensitive mega-variety IR64 as the recipient of *qDTY12.1* from WR, and two  
157 IR64 sibling backcross derivatives with the *qDTY12.1* of WR introgressed through a  
158 bridge donor recombinant with Vandana, hence *Low Yield Penalty* (LPB) and *High*  
159 *Yield Penalty* (HPB) introgression lines **(S1 Fig) [9]**.

160 A cautionary thinking is that LPB and HPB are considered to have uniform  
161 genetic backgrounds but only at the extent and resolution afforded by marker-based  
162 genotyping, and not based on whole-genome sequence assembly. That being said,  
163 the potential contributions of other hidden introgressions that could possibly be  
164 traced from other donors in their pedigrees (*i.e.*, either WR or Vandana), beyond  
165 what can be ascertained by the resolution of marker-assisted selection of the  
166 foreground and background, must not be excluded as potential sources of cryptic  
167 variations between LPB and HPB. By in-depth analysis of the drought-response  
168 transcriptomes at vegetative, reproductive (booting), and grain filling stages under



169 field drought conditions, along with the modeling of co-expression networks, we  
170 identified the first candidate gene of *qDTY12.1* with a convincing direct link to  
171 processes that may modulate the timing of reproductive transition under the limiting  
172 source-sink status during drought. We report here the identification of *DECUSSATE*  
173 gene (*OsDEC*), a single copy locus in the rice genome (Os12g0465700) and first  
174 identified as a regulator of leaf phyllotaxy [33], as a crucial gene of *qDTY12.1* that  
175 facilitates efficient panicle development under drought, mediated by cytokinin.

176

## 177 **Results**

### 178 **Agronomic performances under drought across the comparative panel**

179 The comparative panel was subjected to slow but progressive drought in the  
180 rain-sheltered drought facility at IRRI from the mid-vegetative stage through the  
181 grain-filling stage (**S2 Fig**) [34]. Integrative analysis of grain yield data extracted from  
182 previously published studies under identical drought experimental conditions at IRRI  
183 [22], revealed that LPB suffered a 74% yield penalty from drought, while HPB, WR,  
184 and IR64 suffered higher yield penalties of 97.5%, 94.6%, and 89.1%, respectively  
185 (**Fig. 1A**). Analysis of yield data from identical field drought experiments performed  
186 at IRRI for this transcriptome study recapitulated the same trends, with 66.3% penalty  
187 for LPB, 87.1% for HPB, and 77.3% for IR64 [22]. However, WR showed a lower  
188 penalty (58.3%) than previously observed (**Fig 1B**). While there were year-to-year  
189 variations, it was evident that LPB consistently outperformed the other genotypes.

190 Days to flowering also varied significantly across the comparative panel [22].  
191 LPB showed a drought-induced delay in flowering of only 8 days compared to HPB,

192 WR, and IR64, with delays of 16, 18, and 10 days, respectively (**Fig 1C**). These  
193 differences suggested that LPB may have established a stronger reproductive sink  
194 much earlier than the inferior genotypes, and this may have allowed an escape from  
195 the negative impacts of drought to resource allocation during the critical stages of  
196 floral organ development. Indeed, trends in five other growth components with direct  
197 significance to yield potential showed that LPB was superior with regard to the  
198 magnitude of drought-induced reductions in the number of reproductive tillers, panicle  
199 length, total number of tillers, dry biomass per plant, and plant height (**Fig 1D to 1H**).  
200 Taken together, significant differences in grain yield and other agronomic attributes  
201 relevant to yield between LPB and HPB, suggest that while the sibling *qDTY12.1*  
202 introgression lines may be sharing largely similar genetic backgrounds, their yield  
203 potentials under drought were significantly different from each other.

204

### 205 **Transcriptome fluxes across genotypes revealed by Propensity normalization**

206 Based on contrasting drought phenotypes, we hypothesized that fine-scale  
207 differences at the transcriptome level could be detected between LPB and HPB.  
208 Temporal fluxes in the transcriptome are windows to both subtle and large-scale  
209 differences between the sibling introgression lines that could illuminate potential  
210 differences in global regulatory mechanisms. Using the Propensity-normalized FPKM  
211 values, we performed two comparisons to capture the profiles of transcriptome fluxes  
212 in the flag leaves across genotypes and developmental stages. The first comparison  
213 utilized unfiltered Propensity-scores, *i.e.*, total distribution ( $-n < Propensity > +n$ )  
214 within three windows of the flag leaf transcriptomes, namely, global or total gene set

215 (n = 25,786), and transcription factor (n = 1,340) and stress-related (n = 2,589) gene  
216 subsets (**S3 Fig; S2 Table**). Hierarchical clustering indicated that in all three  
217 windows, the booting stage profiles exhibited significant dissimilarities between the  
218 four genotypes irrespective of growth condition. In contrast, LPB and HPB had very  
219 similar profiles at the vegetative stage under both irrigated and drought conditions  
220 with surprising similarity to WR, and dissimilarity to IR64 under irrigated condition.  
221 Fluxes during grain-filling showed significant overlaps across genotypes, but with  
222 LPB showing higher intensity in the positive propensity bands (**Fig 2A**). The  
223 similarities in vegetative profiles across LPB, HPB, and WR coupled with dissimilarity  
224 to IR64 was unexpected as the genomic contribution from WR was supposed to have  
225 been significantly diluted during recombination with Vandana and during the  
226 subsequent introgression to IR64 [22].

227         The second comparison was based on filtered Propensity scores of the global,  
228 transcription factor, and stress-related windows of the flag leaf transcriptomes.  
229 Genes included in this comparison had Propensity scores within the defined ranges  
230 of  $-0.3 \leq Propensity \leq +0.3$ , where the highest probabilities for significant differences  
231 in both positive and negative directions would be expected (**S3 Fig**). Changes in  
232 expression among these genes were not due to spurious fluctuations and included  
233 8,215 genes, 410 genes, and 833 genes in the global, transcription factor, and  
234 stress-related windows, respectively. Hierarchical clustering more vividly  
235 demonstrated the uniqueness of the fluxes of LPB at booting stage across the three  
236 windows (red boxes), and recapitulated the similarities between LPB, HPB, and WR  
237 at the vegetative stage under irrigated conditions, the dissimilarity with IR64 at

238 vegetative stage, and the overlaps between the four genotypes at grain-filling stage  
239 **(Fig 2B)**.

240 Conclusively, the LPB fluxes at booting stage showed a well-modulated  
241 character under both irrigated and drought conditions for the vast majority of genes  
242 across all three windows. In stark contrast, HPB, WR, and IR64 showed significant  
243 fragmentation of fluxes, giving evidence of a disjointed expression character.  
244 Altogether, the patterns revealed by both the filtered and unfiltered comparisons of  
245 Propensity-normalized expression established the uniqueness of LPB at booting  
246 stage, especially relative to its sibling HPB.

247

#### 248 **Directionality of transcriptome fluxes suggests a robust mechanism in LPB**

249 Integral to adaptive responses at the cellular level, the directional character  
250 (*i.e.*, upward skew, downward skew) of transcriptomic fluxes would be indicative of  
251 how well the complex waves of signals and gene activation and repression are  
252 organized in accordance with the underlying genetic circuitry towards cellular  
253 efficiency [35]. In conjunction with the flux analysis, we also determined the fraction  
254 of genes in the three flag leaf transcriptome windows with positive (positive  
255 propensity fraction; PPF) and negative (negative propensity fraction; NPF) propensity  
256 scores, respectively. These genes were correlated with the magnitude of skewing  
257 across the Propensity distributions across developmental stages in all three  
258 transcriptome windows (**Fig 3; S3 Fig**).

259 Consistent with the unique fluxes observed in LPB at booting stage, the  
260 directional character of the three transcriptome windows was also unique in LPB at

261 booting stage under drought (**red boxes in Fig 3A-3C**), with LPB exhibiting a  
262 downward skew (NPF>PPF) whereas HPB and WR had upward skews (PPF>NPF),  
263 and IR64 being neutral. With very few exceptions, the directional character of each  
264 gene set was highly conserved between the irrigated and drought conditions within a  
265 genotype, irrespective of developmental stage. This potentially '*hard wired*' nature of  
266 the directional character signified that expression fluxes that correlate with either  
267 positive or negative phenotype may have resulted from fine-scale dynamics of  
268 transcriptional modulation within specific subsets of genes (*i.e.*, networks). The  
269 downward directional character of LPB at booting stage during drought is an  
270 evidence of a '*tamed*' transcriptome, where fluxes are highly organized and targeted  
271 for effective use of the transcriptional machinery without much trade-offs. In contrast,  
272 HPB and WR exhibited an '*untamed*' hence highly active transcriptomes, betraying a  
273 disordered response with potentially detrimental consequences stemming from  
274 inefficient use of cellular resources **[36,37]**.

275         Booting stage represents a critical shift in resource allocation from vegetative  
276 sources to reproductive sinks that could be impaired drastically by drought **[38,39]**.  
277 Conservation and efficient use of cellular resources as mediated by the downward  
278 transcriptomic fluxes in LPB would prove beneficial for successful reproductive  
279 development. The unique signature towards more modulated fluxes in LPB implies  
280 an efficient resource allocation that may be impacting source-sink strength towards  
281 reproductive transition. This finding appears to be consistent with the function of  
282 *qDTY12.1* as a yield QTL (**S2 Fig**).

283 Coupled with the downward, conservative fluxes at booting stage, LPB  
284 exhibited a positive skew across all three windows at the grain-filling stage during  
285 drought (**Fig 3A-3C**). This was in contrast to HPB which showed a negative skew in  
286 the same three windows. Both WR and IR64 showed mostly non-skewed fluxes for  
287 all three windows under drought. The grain-filling stage represents the temporal  
288 continuum when the grain biomass is largely dependent on how well resources are  
289 channeled to reproductive sinks during development. Thus, the upward  
290 transcriptomic fluxes in LPB compared to the downward fluxes in HPB during the  
291 grain-filling stage may have contributed to their differences in yield retention. The  
292 directional character of the transcriptomic fluxes did not differ between the genotypes  
293 at the vegetative stage. However, there were differences in the magnitude of the  
294 skew with WR exhibiting the most drastic downward flux (**Fig 3A-3C**).

295 Evidence for the directionality trends was also apparent in the Propensity  
296 distribution plots of the global transcriptomes across genotypes under both irrigated  
297 and drought conditions (**S3 Fig**). The distribution plots at the vegetative stage under  
298 irrigated condition had almost direct overlap across all genotypes, signifying that the  
299 transcriptomes were all in homeostatic, low-level conditions (*i.e.*, no significant  
300 perturbations). However, when drought was imposed and integrated with  
301 developmental signals, the Propensity distribution plots began to diverge along the x-  
302 axis (propensity score) across genotypes. The skewing of propensity plots matched  
303 the directional character of fluxes as determined by the positive and negative  
304 propensity fractions. Differences in expression fluxes and directional character of the  
305 flag leaf transcriptome at booting stage indicated a unique drought response in LPB.

306 **Candidate yield-associated gene (*OsDEC*) encoded by *qDTY12.1***

307 Previous study proposed that the major effect of *qDTY12.1* could be explained  
308 by a network of genes that regulate root architecture, coordinated by the transcription  
309 factor *OsNAM<sub>12.1</sub>* [23]. While these findings represent a significant advance in  
310 understanding the function of *qDTY12.1*-encoded genes, evidence directly  
311 implicating this network to a yield-related mechanism is indirect at best. Guided by  
312 the flag leaf transcriptome profiles, we re-examined the expression and annotation of  
313 all genes within the *qDTY12.1* syntenic region in the Nipponbare *RefSeq*  
314 (chromosome-12) as delineated by the flanking RM28099 and RM511 markers [20].

315 We found a total of 50 annotated protein-coding genes (**S3 Table**) within the  
316 syntenic 1.554 Mbp region in the Nipponbare *RefSeq* within coordinates 15,848,736  
317 bp to 17,401,530 bp [40]. However, only 18 of these genes were expressed in at  
318 least one developmental stage in any genotype. The expressed genes occurred in  
319 small clusters interspersed with genes without any detectable expression in the flag  
320 leaf (**Fig 4**). Co-expression analysis by RiceFRIEND [41] showed that none of the 18  
321 expressed *qDTY12.1* genes formed networks amongst each other, suggesting that  
322 none of them were related through a common gene regulon as previously proposed  
323 [23]. However, the RiceFRIEND network model showed that 12 of the genes had  
324 significant co-expression with other genes from across the genome (**Fig 5A**).

325 One of the genes (*Os12g0465700*) was significantly co-expressed with two  
326 transcription factors (*Os05g0509400*, *Os08g0159800*) whose orthologs in  
327 *Arabidopsis* (*At3g22760* and *At1g32360*, respectively) are involved the regulation of  
328 cell division and expansion in floral meristem and expressed mainly in stamens,

329 pollen mother cells, pollen tube, and immature ovules [42–46]. The *Os12g0465700*  
330 had been previously designated as *DECUSSATE* (*OsDEC*), functioning in the  
331 regulation of leaf phyllotaxy and associated with the apical meristem (SAM) and root  
332 apical meristem (RAM) through cytokinin-mediated signaling [33]. It was proposed  
333 that *OsDEC* may function as potential transcriptional regulator with broad spectrum  
334 targets in response to cytokinin-mediated growth signals [47–53]. *OsDEC* was also  
335 implicated with reproductive and yield-related functions [33].

336 *OsDEC* was differentially expressed in the flag leaf under irrigated and drought  
337 conditions across developmental stages and genotypes. Differential expression was  
338 evident from both the Propensity-based and FPKM-based profiles. *OsDEC* was also  
339 significantly upregulated by drought, specifically during the booting stage in LPB but  
340 not in HPB, WR and IR64 (Fig 5B). The unique drought-induced expression of  
341 *OsDEC* in the flag leaves of LPB at the critical stage of panicle initiation further  
342 solidified its potential importance in the regulation of yield-related mechanisms [54].

343

#### 344 **Disruption of *DEC* orthologs in *Arabidopsis* compromised yield**

345 While there is a single copy of *OsDEC* (*Os12g0465700*) in the rice genome,  
346 duplicate copies (*At3G03460*, *At5G17510*) have been identified in *Arabidopsis*  
347 *thaliana*, with *At5G17510* as the closest ortholog (S4 Fig). Using the same design of  
348 the flowering-stage drought in the rice experiments (S2 Fig, Fig 6A), we compared  
349 the T-DNA insertion mutants of *At3G03460* (3Gm) and *At5G17510* (5Gm) in Col-0  
350 genetic background with wild-type plants in terms of agronomic performance.  
351 Expression of the mutant genes was abolished by T-DNA insertion (Fig 6B).



352 Results showed that 3Gm was very similar to Col-0 under irrigated conditions  
353 in terms of days-to-bolting, days-to-first-bloom, and days-to-seed-set (**S5 Fig**). On  
354 the other hand, 5Gm bolted much earlier and had shorter days to first bloom and  
355 seed-set relative to the wild-type Col-0. Strikingly, both 3Gm and 5Gm had  
356 significant yield penalties under drought at 34.5% and 41.9%, respectively, while Col-  
357 0, having unimpaired drought-induced expression of both *At3G03460* and  
358 *At5G17510*, only had 13% yield penalty (**Figure 6C, left panel**). Analysis of dry  
359 biomass showed similar trends as in seed yield, with 3Gm having slightly higher  
360 biomass under irrigated condition compared to 5Gm and Col-0 (**Fig 6C, right panel**).  
361 However, there was no significant difference in the accumulation of biomass across  
362 the three genotypes under drought. The trends in seed yield and dry biomass  
363 suggest that differences under drought were perhaps the result of altered source-sink  
364 dynamics in the mutants due to the loss of *AtDEC* functions.

365

### 366 ***OsDEC* is the core of a genetic network with other flowering-associated genes**

367 The lack of apparent co-expression of *OsDEC* with other *qDTY12.1* genes  
368 suggested that if it was forming a network, the component genes would be located  
369 outside of the QTL boundaries. To address this hypothesis, we used *OsDEC* as bait  
370 to fish-out for other co-expressed genes in each genotype. In the first step of the  
371 iterative procedure, we used the Propensity scores to identify the most significantly  
372 co-expressed genes at booting stage, revealing a total of 195 genes in LPB, of which  
373 the great majority were cytokinin-related.

374 In the second step, the primary pool of co-expressed genes was further  
375 reduced to a much tighter cluster of 30 genes with the common gene ontology (GO)  
376 keywords of ‘*cytokinin*’, ‘*flowering*’, and ‘*inflorescence*’ (**Figure 7A, red box**). With a  
377 threshold Propensity value of  $n \geq 0.5$ , the core of the network with the most  
378 significant similarities in flux with *OsDEC* was identified as a smaller subset of 11  
379 genes (**Table 1**). The FPKM-based co-expression profiles of this core is shown in the  
380 hierarchical clustering in **Fig 7B**, with Clades-2, -3, and -4 exhibiting the most highly  
381 significant co-expression with *OsDEC* under both irrigated and drought conditions.  
382 *OsDEC* is a member of Clade-2 with three other genes (*Os07g0108900* =  
383 *OsMADS15*; *Os05g0521300* = *OsPHP3*; *Os03g0109300* = *OsLOGL3*). Annotation  
384 queries indicate that these genes shared common functions by virtue of their roles in  
385 the specification of ‘*inflorescence meristem identity*’ (GO:0048510), ‘*floral organ*  
386 *regulation*’ (GO:0048833), ‘*cytokinin signaling*’ (GO:0009736), and ‘*cytokinin*  
387 *biosynthesis*’ (GO:0009691). The only gene in Clade-3 was annotated as a floral  
388 organ regulator (*Os07g0568700*; GO:0048833). The other solitary gene in Clade-4 is  
389 annotated as *OsMADS-14* (*Os03g0752800*), which functions in the specification of  
390 inflorescence meristem identity (GO:0048510).

391 To capture the secondary and tertiary components of the *DEC*-network, other  
392 genes with cytokinin-associated functions that exhibited significant co-expression  
393 with *OsDEC* and/or its five (5) other direct cohort genes were identified in the third  
394 iteration. FPKM-based hierarchical clustering revealed a larger group that formed  
395 thirteen clades of tightly co-expressed genes around the *DEC*-network. A total of 36  
396 genes (**S4 Table**) that were most significantly co-expressed with *OsDEC* and its

397 direct cohort genes were contained within two clades that reflect the potential  
398 functional significance of the *DEC*-network (**Fig 8A**). The main hub of this network of  
399 36 genes is *OsDEC* itself and two MADS-box transcription factors that regulate  
400 meristem transition from vegetative to flowering stage, *i.e.*, *Os07g0108900* =  
401 *OsMADS15*, *Os01g0922800* = *OsMADS51* (**Fig 8B**). The other ‘*peripheral*’  
402 components surrounding the *DEC*-network were dispersed across seven clades, all  
403 of which are associated with vegetative to reproductive transition of the meristem.

404

#### 405 ***DEC*-network is specific to booting stage and genotype-dependent**

406 To further understand the significance of *OsDEC* to yield maintenance under  
407 drought, we compared the *DEC*-network organization across developmental stages  
408 within LPB, *i.e.*, vegetative versus booting versus grain-filling, and across genotypes  
409 with or without the *qDTY12.1*, *i.e.*, LPB versus HPB, donor parent WR, and recipient  
410 parent IR64. Hierarchical clustering showed significant differences in co-expression  
411 among the 36 ‘*core*’ and ‘*peripheral*’ genes that comprise the *DEC*-network across  
412 developmental stages (**Fig 8 C-E**). In LPB, genes of the *DEC*-network were  
413 coordinately induced by drought specifically at booting stage, while no significant  
414 changes in expression were detected at vegetative and grain-filling stages.

415 Further examination of the organization of the booting-stage network across  
416 genotypes revealed widely divergent patterns, with only LPB showing evidence of  
417 coordinated expression of all ‘*core*’ and ‘*peripheral*’ components (**Fig 9A**). The  
418 genotype-dependent and booting stage-specific signatures in LPB suggested that the  
419 operability of the *DEC*-network was likely a consequence of the proper alignment of

420 all the upstream regulatory components that established the optimal expression of  
421 *OsDEC* and subsequently all of its downstream cohort/peripheral genes.

422 The disorganized *DEC*-network in HPB appeared to suggest the opposite of  
423 what was observed in LPB, perhaps due to the lack of complementary alleles for the  
424 upstream components that facilitate the same level of network organization as  
425 observed in LPB. The variant patterns in the *DEC*-network between the sibling LPB  
426 and HPB, both of which had the same *OsDEC* allele from WR (**sequence data not**  
427 **shown**), further implied an efficient integration of stress and developmental signals  
428 through the interaction between *qDTY12.1* and its ‘*peripheral*’ cohort genes in the  
429 genetic background (**Fig 9B**). Thus, a complete *DEC*-network appeared to be  
430 strategic to an optimal integration of drought-mediated signals with developmental  
431 signals during the early stages of flowering when the critical reproductive sink is  
432 being established.

433

#### 434 **Yield component traits associate with the *DEC*-network**

435 For further interpretation of the larger biological significance of the *qDTY12.1*-  
436 encoded *OsDEC* and its network with other genes in the genetic background, we  
437 established a biological network map through the Knetminer knowledge integration  
438 tools [55]. This analysis links many pieces of relevant information from all types of  
439 genetic studies curated in the literature to establish direct or indirect associations  
440 between a gene or network of genes and physiological and agronomic traits. The  
441 knowledge integration map directly linked all but one of the 36 genes that comprised  
442 the *DEC*-network with various yield component traits, particularly those relevant to

443 source-sink regulation, sucrose and starch biosynthesis and deposition, grain-filling,  
444 seed development and maturation, and seed weight (**Fig 10, S5 Table**).

445 A recent study in maize highlighted the significant impacts of *ZMM28*  
446 overexpression to flowering time, plant growth, photosynthetic capacity, nitrogen  
447 utilization, and yield under drought [56]. *ZMM28* is a member of the AP1-FUL sub-  
448 group of MADS-box transcription factors with critical roles in the regulation of  
449 flowering time, floral organ identity, and vegetative to reproductive transition [57–59].  
450 We found that *OsMADS18* (*Os07g0605200*), the closest ortholog of *ZMM28* in rice,  
451 along with two other MADS-box genes (*Os03g0752800* = *OsMADS14*;  
452 *Os07g0108900* = *OsMADS15*) had strikingly similar expression as *OsDEC* in LPB at  
453 the booting stage (**Fig 11**). Expression peaked at booting stage in LPB and IR64, but  
454 not in HPB and WR. These findings suggested the influence of IR64 genetic  
455 background in the optimal configuration of *DEC*-network in LPB but not in HPB. Of  
456 important note, the expression of *OsMADS18* in LPB across developmental stages  
457 was very similar to the *zmm28* signature in transgenic maize [56].

458 LPB had the shortest delay, *i.e.*, eight (8) days, in flowering time under drought  
459 in comparison to IR64, HPB, and WR, with ten (10), sixteen (16), and eighteen (18)  
460 days delay, respectively (**Fig 1**). Coupled with the observed trends in MADS-box  
461 expression, it appeared that the *DEC*-network in LPB had integrated the function of  
462 *OsMADS14*, *OsMADS15*, and *OsMADS18* towards a mechanism for reducing time  
463 delays in reproductive growth transition during drought.

464

465

## 466 **Discussion**

467           Introgression and pyramiding of large-effect QTLs such as *qDTY12.1* have  
468 shown major incremental improvements in rice yield maintenance under drought  
469 **[14,15,17,19,28,60–62]**. However, there have been instances when the  
470 introgression of *qDTYs* did not confer the expected phenotypic effects **[22]**. A similar  
471 phenomenon has been reported with the introgression of the *SalTol* QTL for salinity  
472 tolerance in different rice cultivars, when the presence of the QTL alone did not  
473 necessarily lead to the expected phenotypic effects **[30,63]**. Inconsistent effects are  
474 caused by negative or positive epistatic interactions between the QTL genes and  
475 other genes in the genetic background that could either enhance or drag the effects  
476 of the QTL **[7,8]**. In this study, we illuminated this enigma by integrating the new  
477 concepts of the *Omnigenic Theory* **[31]**, and by using the mechanisms that cause  
478 transgressive traits in rice to further illuminate our conceptual framework **[7,8,30]**.

479

## 480 **Significance of *qDTY12.1* to genetic network rewiring**

481           It was postulated that non-parental traits created by genetic recombination are  
482 due to genetic coupling-uncoupling and network rewiring effects. Rewired genetic  
483 networks are caused by large assemblages of synergistic or antagonistic genes that  
484 get coupled or uncoupled during multiple rounds of recombination. In the context of  
485 the *Omnigenic Theory*, the few ‘core’ genes with major effects on phenotypic  
486 variance could either be coupled or uncoupled with numerous compatible or  
487 incompatible *peripheral* genes with minute but additive effects on the phenotypic  
488 variance **[31]**. The additive effects of the ‘*peripheral*’ genes across the genetic

489 background may either enhance or drag the effects of the ‘core’ genes that function  
490 as the hub of the network.

491 Our results showed yet another layer of evidence that the inconsistent effects  
492 of *qDTY12.1* observed across two sibling introgression lines in the genetic  
493 background of IR64 were due to either optimally (LPB) or sub-optimally (HPB)  
494 rewired genetic networks, with a *qDTY12.1*-encoded regulatory gene *OsDEC*  
495 functioning as the hub of the network. We hypothesized that while backcross  
496 introgression of the functional *qDTY12.1* allele from Way Rarem (WR) into IR64  
497 genetic background (through a bridge donor derived from WR x Vandana) may have  
498 preserved the integrity of the original *qDTY12.1* allele by marker-assisted selection of  
499 the foreground, the genomic environments (background) of the introgressed  
500 *qDTY12.1* were likely to be significantly divergent between sibling introgression lines.  
501 By extension, the rewired genetic networks were configured by many loci/alleles from  
502 either parents, organized in such a manner that either optimal and sub-optimal  
503 alliances define the operative structure of the network. Further, the superior progeny  
504 (LPB) appeared to contain not only the required network hub, that is the *OsDEC*  
505 allele from WR, but also the optimal assemblage of ‘peripheral’ alleles across the  
506 genetic background leading to a fully functional synergy. These ‘peripheral’ alleles  
507 are likely to have come directly either from IR64 or remnant and cryptic introgression  
508 of alleles from WR or Vandana that escaped the resolution and scope of marker-  
509 assisted selection of the background genome. On the other hand, while the inferior  
510 sibling HPB also contained the identical network core from WR (*OsDEC*), it appeared

511 to be lacking the same optimal assemblage of ‘*peripheral*’ alleles from across the  
512 genetic background to configure a functioning synergy for the *DEC*-network (**S1 Fig**).

513 Comparative dissection of the flag leaf transcriptomes of LPB and HPB in  
514 relation to the *qDTY12.1* donor parent WR and recipient parent IR64 showed that  
515 while the global patterns under irrigated condition at the vegetative and grain-filling  
516 stages were generally similar across the genotypes, there were drastic differences at  
517 the booting stage (**Fig 2**). These differences appeared to be the results of coupling-  
518 uncoupling effects, hence interaction of distinct subsets of synergistic and  
519 antagonistic alleles from either parent. As such, the positive effect of *qDTY12.1*  
520 introgression in context of *DEC*-network would be manifested only when optimal  
521 number of compatible ‘*peripheral*’ alleles with additive effects are assembled to  
522 generate the transgressive genetic network that was apparent in the booting-stage  
523 transcriptome of LPB. It is evident based on the distinct transcriptomic signatures of  
524 LPB and HPB, that while *qDTY12.1* has a large effect on yield, expressing its full  
525 potential requires many other ‘*peripheral*’ genes across the genetic background.

526 Our current results do not indicate that any other genes within the *qDTY12.1*  
527 are important for the full functionality of the *DEC*-network. Indeed, all of the 35  
528 peripheral genes that comprised the functional *DEC*-network in LPB are dispersed  
529 throughout the genome, clearly outside of the boundaries of *qDTY12.1* (**Fig 9B**).  
530 Thus, the transgressive nature of yield maintenance under drought as conferred by  
531 *OsDEC*, requires a synergy with many other genes in the genetic background. This  
532 was made abundantly clear by the fact that although HPB and WR had the same  
533 *qDTY12.1* allele as LPB, their yield potentials under drought were woefully inferior.



534           Another important advance contributed by this study is the discovery that while  
535 LPB and HPB were assumed to be largely similar with regard to *qDTY12.1*, the flag  
536 leaf transcriptome of LPB specifically at booting stage was drastically different from  
537 its recurrent and QTL donor parents and sibling introgression line (**Fig 2B**). Booting  
538 stage represents a critical crossroad of photosynthetic source-sink dynamics  
539 between the flag leaf and developing inflorescence, characterized by physiological  
540 and biochemical processes that sustain seed development **[64–68] (S2 Fig)**. As  
541 such, events unique to LPB at booting stage provides a valuable link to the functional  
542 significance of *qDTY12.1* to cellular mechanisms critical to yield components. It has  
543 been shown that the timing of drought at the initiation of booting is most deleterious,  
544 with negative effects on yield-related traits including grain number per panicle,  
545 panicles per area, and total above ground biomass **[39]**. The significance of  
546 *qDTY12.1* is consistent with the synchronized activation of the *DEC*-network when  
547 drought coincides with the early stages of floral organ development **[17,18,25,69]**.

548

#### 549 ***OsDEC* affects yield-related processes through the cytokinin signaling pathway**

550           The *OsDEC* was singled out as the most likely candidate for a yield-related  
551 gene of *qDTY12.1* based on its unique drought-induced expression in the flag leaf of  
552 LPB but not in the other genotypes, specifically at the initiation of booting. We found  
553 that *OsDEC* was the only one among the 18 *qDTY12.1* genes transcribed in the flag  
554 leaf that was also differentially induced by drought at the booting stage only in LPB  
555 with significant co-expression with two transcription factors related to reproductive  
556 growth (**Fig 4, Fig 5 A-B**). While the specific biochemical function of *OsDEC* remains

557 unknown, it is known to have a regulatory function over Type-A and Type-B  
558 Response Regulators (ARR) in the two-component cytokinin signal transduction  
559 pathway [33,70–72]. Cytokinin is intrinsic to a myriad of cellular processes that are  
560 critical for seed development as well as for mediating cellular signals in response to  
561 drought [47,49–52,73,74]. Studies in many agronomically important crops have also  
562 shown that overexpression of cytokinin biosynthetic genes leads to significant  
563 improvements in yield potential under drought [53,75–77].

564         Results of this study support a hypothesis that through a cytokinin-mediated  
565 pathway, *OsDEC* regulates physiological processes in the flag leaf that appeared to  
566 be important in adjusting the timing of floral organ initiation when the photosynthetic  
567 source is perturbed by drought. We further infer that this mechanism could be  
568 important in ensuring the early establishment of a strong reproductive sink to sustain  
569 the requirements of seed development and maturation when resources continue to  
570 be limited by drought effects. Indeed, the 35 other genes in the *DEC*-network were  
571 mostly regulatory genes with key functions in the regulation of floral meristem,  
572 vegetative to reproductive transition, cytokinin signal transduction, and other aspects  
573 of reproductive growth. These trends were further reiterated by the models generated  
574 by KnetMiner, which showed that all genes in the larger *DEC*-network funnel into  
575 processes involved with seed development, grain filling, sucrose transport, starch  
576 biosynthesis, and many other yield-component traits (Fig 10).

577         Furthermore, many introgression lines of *qDTY12.1* have been extensively  
578 studied to determine what physiological characteristics are important in the  
579 maintenance of low-yield-penalty under drought [25–27,78,79]. These

580 characteristics include water uptake efficiency, increased proline levels in roots,  
581 improved remobilization of amino acids for nitrogen status, improved transpiration  
582 efficiency, increased panicle branching, increased lateral root formation, and a  
583 reduction in flowering delay under drought. These characteristics are consistent with  
584 the central role of *OsDEC* in integrating survival, developmental and stress-related  
585 responses to minimize the cost of cellular perturbations to reproductive growth [22].

586 From the standpoint of productivity, flowering represents a developmental  
587 crossroad. As such, it is regulated tightly by environmental signals to ensure  
588 reproductive success of the species, hence the process is dynamic, multi-faceted,  
589 and with multiple levels of control over a large number of genes. A closer  
590 examination of the components of the functional *DEC*-network (*i.e.*, 35 genes)  
591 indicate direct connections to one or more molecular, cellular, or biological functions  
592 that are relevant to the control of flowering time, including *hormonal signaling*  
593 (GO:0007267), *light signaling* (GO:0009416), *epigenetic control* (GO:0040029),  
594 *developmental control of floral organ differentiation and fate* (GO:0048437),  
595 *maintenance of reproductive meristems* (GO:0010073), and *transcriptional regulation*  
596 (GO:0006357). Some of the well-known MADS-box transcription factors such as  
597 *OsMADS14*, *OsMADS15*, and *OsMADS18* define the hallmark signatures of direct  
598 association of *OsDEC* with the regulation of flowering time [59,80,81].

599 The magnitude of drought-induced delay in flowering is strongly correlated  
600 with yield retention in rice [82,83]. Progressive drought imposed before the onset of  
601 flowering caused 8, 16, 18, and 10 day delays in normal flowering time in LPB, HPB,  
602 WR, and IR64, respectively (Fig 1). Under limited water conditions, earlier flowering

603 would provide a developmental adjustment to minimize the effects of continuous  
604 depletion of photosynthetic sources that would normally sustain reproductive  
605 transition. Therefore, expression of many flowering-related genes with molecular and  
606 cellular functions associated with *floral organ identity* (GO:0010093), *inflorescence*  
607 *meristem maintenance* (GO:0010077), and *spikelet development* (GO:0009909)  
608 appeared to commence earlier in LPB due to drought. These GO terms are relevant  
609 to the establishment and maintenance of critical yield-component traits such as  
610 *number of fertile spikelets*, *number of reproductive tillers*, *number of panicles*, *grain*  
611 *weight*, *number of grains per panicle*, and *panicle size*, as shown in the KnetMiner  
612 Map and verified by yield components data (**Fig 10, Fig 1**).

613

#### 614 **Potential implications of the *DEC*-network at the molecular and cellular levels**

615 In earlier efforts to characterize the cellular functions of *OsDEC* using *dec*  
616 mutants, the following conclusions emerged: 1) *OsDEC* is insensitive to exogenous  
617 cytokinin; 2) *OsCKX2* and other *cytokinin oxidase* genes were upregulated in knock-  
618 out mutants; 3) active cytokinins cZ and iP, along with some of their intermediates  
619 were significantly reduced in mutants; 4) expression of *LOG* (*Lonely GUY*) genes  
620 were not affected in mutants; and 5) Type-A Response Regulators were  
621 downregulated while some Type-B Response Regulators were upregulated **[33]**.

622 Additionally, *OsDEC* is most highly expressed in immature leaves and inflorescence  
623 apex. DEC protein potentially functions as transcriptional regulator based on the N-  
624 terminus glutamine-rich domain associated with chromatin remodeling functions **[84–**  
625 **88]**. By integrating these information with other co-expressed genes in the flag leaf

626 transcriptome of LPB, we propose a hypothetical model of the mechanisms by which  
627 the *DEC*-network regulates early flowering (**Fig 12**).

628 We hypothesize that in LPB, the pools of active cytokinins would be enhanced  
629 due to drought-mediated upregulation of *OsLOGL3* and *OsLOGL7* (*Lonely-Guy*) and  
630 downregulation of *OsCKX2*. The significance of *OsCKX2* downregulation to the  
631 enhancement of grain yield in rice has been confirmed **[73]**. In the model, the pool of  
632 active cytokinins is upregulated with concomitant downregulation of cytokinin  
633 degradation by *OsCKX2*. Studies have shown that *OsDEC* regulates *CKX*  
634 expression but not *LOG* expression **[33]**. It has also been reported that a drought and  
635 salinity-associated C2H2 zinc-finger transcription factor (*OsDST*) is directly involved  
636 in the regulation of *OsCKX2* **[89]**. It has also been reported that *DST* mutation  
637 (*OsDST<sup>reg1</sup>*) downregulates *OsCKX2*, thereby increasing the level of active cytokinin  
638 **[90]**. Downregulation of *OsDST* was evident in the flag leaf transcriptome at the  
639 booting stage, with -2.2 and -5.9 log<sub>2</sub>-fold decreases in transcript abundance under  
640 drought in LPB and IR64, respectively. In contrast, *OsDST* was upregulated in HPB  
641 and WR with 0.74 and 0.62 log<sub>2</sub>-fold changes, respectively (**S6 Fig**).

642 Increased levels of active cytokinin have been implicated to yield  
643 enhancement in rice, which correlates well with the higher yield potential of LPB  
644 under drought and parallel upregulation of cytokinin biosynthetic genes and  
645 downregulation of cytokinin degradation genes such as *OsCKX2* **[49,50,52]**.  
646 Additionally, cytokinin signaling directly affects other genes that regulate flowering  
647 **[48,91–93]**. Accumulation of active cytokinin in LPB suggests a mechanism that  
648 facilitates earlier induction of flowering under drought as a penalty-avoidance

649 response by establishing proper source-sink dynamics earlier before the source  
650 becomes more limited or depleted.

651 Network of *OsDEC* with *OsMADS14*, *OsMADS15*, and *OsMADS51* showed  
652 that indeed the flowering pathway was induced earlier in LPB. These MADS  
653 transcription factors are critical for regulating inflorescence meristematic processes in  
654 rice [59,80,94,95]. A recent study in maize also showed that overexpression of the  
655 *OsMADS18* ortholog in maize (*zmm28*) led to significant increases in yield under  
656 sub-optimal irrigation [56]. It has also been shown that *OsMADS18* accelerates the  
657 transition of meristem from vegetative to reproductive by promoting the florigen *Hd3a*  
658 via cytokinin signaling [81,96]. It has been reported that methyl-jasmonate (*MeJA*)  
659 and *ABA* can cause significant reduction in yield through their direct impacts on  
660 reproductive structures [97,98]. As such, the proper modulation of the pathway  
661 would be necessary to preserve yield, as depicted in the hypothetical model (Fig 12).

662 The proposed model of a functional *DEC*-network in LPB has the necessary  
663 components of a genetic machinery that could lead to enhanced pools of active  
664 cytokinins especially in flag leaves at the time of booting and during exposure to slow  
665 but progressive drought. Yield and yield-component data collected from the drought  
666 experiments performed for the transcriptomics studies recapitulated previously  
667 reported superior performance of LPB due to *qDTY12.1* effects (Fig 1).

668

### 669 **Modulation of ABA response in LPB through the *qDTY12.1* mechanism**

670 ABA signaling is central to the first line of defense against drought but not  
671 without any costs to plant development and net productivity [97–101]. The

672 prioritization of cellular resources to balance the costs of survival with net productivity  
673 may require an extensive modulation of ABA responses. The overactive  
674 transcriptomic burst at booting stage in HPB, WR and IR64 are indicative of a costly  
675 and ‘*all in*’ response to drought, hence greatly perturbed cellular status. In contrast,  
676 the transcriptomic response in LPB at booting stage appeared to be more modulated  
677 or ‘*tamed*’ (**Fig 3**). In other words, more is not necessarily always better as subtle  
678 changes could go a long way. Indeed, reports in other crops also showed much  
679 fewer number of differentially expressed genes in drought-tolerant genotypes  
680 compared to more sensitive genotypes [**36,37**]. The overactive transcriptomic burst in  
681 HPB, WR and IR64 based on the directionality of transcriptome fluxes may largely be  
682 associated with ABA response.

683         A cursory evidence for the taming of the ABA response was illustrated by the  
684 differential expression of zeaxanthin epoxidase (ZEP; *Os04g0448900*) that catalyzes  
685 the first committed step in ABA biosynthesis via the xanthophyll cycle in plastids  
686 [**99,102,103**]. Drought-mediated upregulation or downregulation of ZEP was  
687 determined as a log<sub>2</sub> fold-change from control values for each developmental stage  
688 (**S7 Fig**). A specific look at the booting stage showed a -0.57 log<sub>2</sub> decrease in *ZEP*  
689 expression in LPB with drastic expression changes evident in HPB, WR, and IR64, of  
690 4.1 log<sub>2</sub> increase, -3.0 log<sub>2</sub> decrease, and 1.9 log<sub>2</sub> increase, respectively.  
691 Interestingly, inverse trends in ZEP expression across all genotypes was evident at  
692 the vegetative and grain-filling stages. The drastic differences at booting stage  
693 suggest that LPB perhaps has the mechanism that limits ABA biosynthesis and  
694 therefore modulates ABA response mechanism more efficiently. Based on the

695 directionality of transcriptomic fluxes, it is apparent that the '*taming*' effects in LPB  
696 also extend beyond the genes involved in ABA responses.

697

## 698 **Materials and Methods**

### 699 **Minimal comparative panel**

700 Based on extensive genotyping and yield evaluation under progressive  
701 drought [**28,104,105**], a minimal comparative panel illustrating the differential effects  
702 of *qDTY12.1* across genetic backgrounds was established at IRRI. This panel was  
703 comprised of the Indonesian upland cultivar Way Rarem (WR; IRGC122298) as the  
704 original donor of *qDTY12.1*, the drought-sensitive mega-variety IR64 as the recurrent  
705 parent used for backcross introgression of the *qDTY12.1* from WR, and two sibling  
706 introgression lines of IR64 carrying the *qDTY12.1* from WR (IR102784:2-42-88-2-1-2,  
707 IR102784:2-90-385-1-1-3) designated as *low-yield-penalty* (LPB) and *high-yield-*  
708 *penalty* (HPB) lines, respectively [**22,32**].

709

### 710 **Drought experiments and tissue sample collection**

711 Parallel replicated experiments were conducted at IRRI's Ziegler Experiment  
712 Station in Los Banos, Laguna, Philippines (14°30' N longitude, 121°15' E latitude)  
713 during the 2017 wet season (WS; June to November, 2017) for the irrigated and  
714 drought conditions across the minimal comparative panel. The field experiment was  
715 an alpha-lattice design with three replicates (n = 3) and three (3) individual plants per  
716 replicate that were single-seed transplanted in the field plots after establishing for 21  
717 days in seedling beds. Control plots were maintained in standard irrigated levy based



718 on IRRI's standard protocols, while the drought plots were established inside a rain-  
719 out shelter facility for drought screening next to the irrigated plots (**S2 Fig**)  
720 **[25,26,106–109]**. Both the irrigated and drought plots were given continuous  
721 irrigation corresponding to 5 cm standing water until thirty (30) days after planting  
722 (DAP) or 51 days after sowing, when progressive drought was initiated for the  
723 treatment group by withholding water until the end of the season. A life-saving  
724 irrigation was applied to the drought plots at the point when extensive leaf rolling was  
725 observed in order to promote survival until harvest **[34]**.

726 Tissue sampling was conducted on three (3) plants per replicate in both the  
727 irrigated and drought conditions. Samples were comprised of pooled flag leaves with  
728 the connected leaf sheath surrounding the developing panicle. The dates of tissue  
729 sampling were synchronized as defined by the days counted backward ( $t_{-1}$  =  
730 vegetative) or forward ( $t_1$  = grain-filling) from the reference time-point ( $t_0$  = booting) in  
731 order to generate developmentally comparable flag leaf transcriptomes across  
732 genotypes. At  $t_{-1}$ , samples were collected from three (3) plants from each genotype  
733 and experimental plot, seven (7) days after the initiation of progressive drought. At  $t_0$ ,  
734 samples were collected from three (3) plants from each genotype and experimental  
735 plot, twelve (12) days prior to panicle extrusion (heading). At  $t_1$ , samples were  
736 collected fifteen (15) days after anthesis when the developing grains had milky and  
737 dough-like consistencies. All samples were collected at the same time of the day  
738 (between 8:00 AM and 10:00 AM), and were immediately frozen in liquid nitrogen.  
739 Panicle length (mm), plant height (cm), tiller number per plant, reproductive tiller  
740 number per plant, and biomass per plant were recorded from all experimental plots.

## 741 **Transcriptome analysis by RNA-Seq**

742 Total RNA was extracted from frozen flag leaves using the miRVana™ miRNA  
743 isolation kit according to manufacturer's protocol (Invitrogen, Carlsbad, CA). RNA  
744 from three (3) individual plants in each genotype were pooled to create a composite  
745 sample representing each replicate. Two independent RNA-Seq libraries were  
746 constructed from the pooled RNA across genotypes, developmental stages, and  
747 treatments, according to standard in-house protocols [29]. The indexed RNA-Seq  
748 libraries were sequenced twice in the Illumina HiSeq3000 (Oklahoma Medical  
749 Research Foundation, Norman, OK) by strand-specific and paired-end sequencing at  
750 150-bp with 20 to 40 million sequence reads per run.

751 Raw RNA-Seq data was processed and assembled through the established in-  
752 house data analysis pipeline [29]. Sequence output from the indexed RNA-Seq  
753 libraries (PRJNA378253) was preprocessed with Cutadapt (v2.10) and mapped  
754 against the Nipponbare *RefSeq* and corresponding GFF gene models (IRGSP-1.0)  
755 using the Tophat2 (v2.1.1) and Bowtie (v2.2.8.0) [40,110,111]. Gene models were  
756 further refined using Cuffmerge and differential expression was calculated with  
757 Cuffdiff on Cufflinks (v.2.2.1) with default parameters (p-value < 0.05, FDR = 5%)  
758 [112]. Expression of 25,786 annotated protein-coding genes were detected across  
759 the RNA-Seq data matrices of the irrigated versus drought-stressed plants at  
760 vegetative (V7 to V10), early booting (R1 to R2), and grain filling (R7) stages.  
761 Transcript abundance for each annotated locus was expressed as Fragments per  
762 Kilobase of Transcript per Million (FPKM). Biological interrogation of the  
763 transcriptome was performed in three windows, *i.e.*, global or total transcriptome (n =

764 25,786 loci), transcription factor genes (n = 1,340 loci), and stress-related genes (n =  
765 2,589 loci). Transcription factors were extracted from the Nipponbare *RefSeq*  
766 ([https://www.ncbi.nlm.nih.gov/genome/annotation\\_euk/Oryza\\_sativa\\_Japonica\\_Group/102/](https://www.ncbi.nlm.nih.gov/genome/annotation_euk/Oryza_sativa_Japonica_Group/102/)). Stress-related loci were extracted using the keywords listed in **S2 Table**.

768

### 769 **Propensity transformation of RNA-Seq data**

770 Direct comparison of FPKM-based expression has proven to be less efficient  
771 in extracting biologically meaningful expression patterns (fluxes) because of the  
772 confounding effects created by the highly disparate nature of inter-genotypic variation  
773 and the stochastic nature of gene expression. Meaningful changes in gene  
774 expression are also dependent on the molecular interactions of target genes and  
775 their activators/repressors [113,114]. The Gene Flux Theory posits that within the  
776 natural competition for transcriptional machinery, genes with low transcript  
777 abundances are ultra-sensitive to the effects of other genes [115]. Critical loci with  
778 low FPKM in one genotype are often discarded, making the directional character of  
779 expression fluxes difficult to extract. To address these potential limitations in  
780 interpreting the biological significance of inter-genotypic differences, we performed an  
781 additional normalization of the total dataset by Propensity Transformation, which  
782 uses ‘*within genotype*’ and ‘*within treatment*’ comparisons of FPKM-based  
783 expression for each locus against the summation across all time-points and against  
784 the summation of all loci across the entire dataset [116]. The FPKM values across  
785 the entire transcriptome matrix were Propensity-transformed and normalized by:

786 
$$Pt_i = \ln \left( \frac{\frac{T_i}{\sum_{j=t_1}^{t_3} T_{ij}}}{\frac{\sum_{i=1}^n T_j}{\sum_{j=t_1}^{t_3} \sum_{i=1}^n T_{ij}}} \right);$$
 Where:  $Pt_i$  = Propensity transformation of FPKM of

787 transcript  $i$ ;  $T_i$  = FPKM of transcript  $i$ ;  $n$  = Total number of transcripts (25,786);  $j$  =  
788 Variable that iterates over datasets of  $t_1$  =vegetative,  $t_2$  =booting,  $t_3$  = grain-filling; and  
789  $i$  = Variable that iterates over the total number of transcript-encoding loci (**S3 Fig**).  
790 Propensity-transformed datasets (global, transcription factor, and stress-related  
791 windows) were filtered at a threshold of  $-0.3 < Propensity > 0.3$  in order to extract the  
792 gene loci with the largest fluxes, hence most biologically informative differences. The  
793 total of 8,215 loci (out of 25,786) from the global dataset were subjected to k-means  
794 clustering to further refine the large cohort into fifteen (15) sub-clusters for Propensity  
795  $\geq 0.3$ , and ten (10) sub-clusters for Propensity  $\leq -0.3$ . One sub-cluster was chosen  
796 from the extremes of each group and the loci were combined into 384 in the global  
797 filtered dataset. The transcription factor and stress-related groups did not require k-  
798 means clustering with 410 (out of 1,340) and 833 (out of 2,589) loci, respectively.

799

## 800 **Analysis of transcriptome fluxes and directionality**

801 The standard approach for revealing biologically meaningful trends in RNA-  
802 Seq datasets is to identify differentially expressed genes (DEG) that correlate with  
803 the phenotype. While this approach can give useful insights into cellular processes,  
804 the underlying concept tend to be simplistic because responses at the cellular and  
805 whole organismal levels more often than not involve large number of genes [117]. In  
806 order to capture a more biologically relevant view of the drought response  
807 transcriptomes across genotypes, the Propensity-normalized expressions were

808 interrogated to uncover similarities and differences in fluxes on a locus-by-locus  
809 plane. Propensity-transformed expression values facilitated direct comparison to  
810 generate profiles of expression fluxes between genotypes by hierarchical clustering  
811 of the filtered and un-filtered propensity scores in the global, transcription factor, and  
812 stress-related windows.

813         Analysis of the directional character of expression fluxes indicates the degree  
814 by which transcriptional responses are modulated. An unmitigated or '*untamed*'  
815 transcriptional response would be characterized by an overabundance of positive  
816 transcriptional activities while a modulated or '*tamed*' response would be  
817 characterized by highly regulated or controlled repression. The directional character  
818 of expression fluxes in the unfiltered dataset was assessed by comparing the fraction  
819 of loci with positive propensity scores (PPF – positive propensity fraction) to the  
820 fraction of loci with negative propensity scores (NPF – negative propensity fraction).  
821 Directionality was scored as positive skew (upward pointing arrow), negative skew  
822 (downward pointing arrow), or neutral (line segment) (**Fig 3**). A positive skew was  
823 given when PPF was greater than NPF, while a negative skew was given when NPF  
824 was greater than PPF, and neutral when PPF was approximately equal to NPF.  
825 Genes with Propensity scores = 0 (5% to 9% of total) were excluded.

826

### 827 **Hierarchical clustering and statistical analysis**

828         Hierarchical clustering and other statistical analyses were performed using  
829 JMP® (v14.0.0. SAS Institute Inc., Cary, NC). Mean comparisons of agronomic

830 measurements in rice and Arabidopsis experiments were performed with Tukey HSD  
831 following a significant analysis of variance at  $p = 0.05$ .

832

### 833 **RiceFRIEND and KnetMiner analyses**

834 The RiceFRIEND online analysis portal was used for initial capture of other  
835 genes that are co-expressed with *OsDEC* (<https://ricefriend.dna.affrc.go.jp/>) [41]. The  
836 multiple gene guide tool was used to determine co-expression of eighteen (18)  
837 expressed genes of *qDTY12.1* to generate a co-expression map by default setting.

838 The KnetMiner tool was used determine the enrichment of biochemical,  
839 physiological, and agronomic traits that are associated with the various components  
840 of the *DEC*-network (<http://knetminer.rothamsted.ac.uk>) [55]. The Rap-DB loci for the  
841 36 genes in the *DEC*-network was used as the query to search for domains (relevant  
842 biological processes) in Knetminer using default parameters [40]. This tool integrates  
843 knowledge in public domain related to the query (*e.g.*, gene function, GWAS, Protein,  
844 Phenotype, Pathways, etc.) to generate a knowledge map of biological functions.

845

### 846 **Analysis of *DEC* knock-out mutants in Arabidopsis**

847 Orthologs of *OsDEC* in *Arabidopsis thaliana* were determined as *At3G03460*  
848 (*3G<sup>m</sup>*) and *At5G17510* (*5G<sup>m</sup>*) [33], and confirmed by phylogenetic analysis with  
849 EnsemblPlants ([https://plants.ensembl.org/Arabidopsis\\_thaliana/Info/Index](https://plants.ensembl.org/Arabidopsis_thaliana/Info/Index)).  
850 Homozygous mutants [118] were determined using the Salk Institute TDNA Express  
851 Gene Mapping Tools (<http://signal.salk.edu/cgi-bin/tdnaexpress>) and seeds were  
852 obtained from the Arabidopsis Biological Research Center (<https://abrc.osu.edu/>).

853 Seeds were vernalized in 0.1% (w/v) agarose at 4°C for 7 days, sown onto moistened  
854 peat pellets (Jiffy-7® – Peat Pellets) and grown for fourteen (14) days in growth  
855 chambers (Percival Scientific) at constant 22°C with 16 hours of light (100  $\mu\text{mol m}^{-2} \text{s}^{-1}$ )  
856 and 60-70% relative humidity. DNA and RNA extraction and PCR and qRT-PCR  
857 analyses of the mutants were performed according to standard protocols using the  
858 primer sets listed in **S6 Table**.

859 The agronomic and yield performances of *AtDEC* wild-type and mutants were  
860 investigated in a growth chamber drought experiments that mirrored the  
861 developmental timing of stress in the rice experiments [119]. A pilot study  
862 established the effective drought conditions at 30% field capacity, eight (8) days prior  
863 to bolting, 27°C day/22°C night, and 40% relative humidity. Control experiments were  
864 performed at 70% field capacity, constant 22°C, and 65-80% relative humidity.  
865 Vernalized seeds of Col-0, 3G<sup>m</sup>, and 5G<sup>m</sup> were germinated in peat pellets (Jiffy-7®  
866 Peat Pellets, 42mm x 65mm) and grown in two separate growth chambers at  
867 constant 22°C with 16 hours of light (100  $\mu\text{mol m}^{-2} \text{s}^{-1}$ ) and 65-80% relative humidity.  
868 Drought experiment was performed by growing the plants for 20 days (Col-0; 3G<sup>m</sup>)  
869 and 16 days (5G<sup>m</sup>), before withholding irrigation. Progressive drought was imposed  
870 for 14 days by maintaining 30% field capacity, while the control plants were  
871 maintained at 70% field capacity. The peat pellets at 30% field capacity received a  
872 daily water input to maintain a weight of 33 g (peat pellet + plant + plus water input).  
873 Control and post-drought plants were maintained at 65-70 g. Days to bolting, days to  
874 first bloom, days to seed set (first silique), total dry biomass per plant, and total seed  
875 yield per plant were determined under both irrigated and drought conditions.

876 **Acknowledgments**

877           This project was supported by NSF-IOS Plant Genome Research Program  
878 Grant-1602494 and Bayer CropScience Endowed Professorship. Genomic  
879 computations were performed using the supercomputing facilities at the ROIS  
880 National Institute of Genetics, Mishima, Japan, and Texas Tech University High-  
881 Performance Computing Cluster. Next-Gen sequencing was performed at the  
882 Oklahoma Medical Research Foundation, Norman, OK.

883

884

885

886

887

888

889

890

891

892

893

894

895

896

897

898



899 **References**

- 900 1. Khush GS. Strategies for increasing the yield potential of cereals: case of rice as an  
901 example. Gupta P, editor. *Plant Breed.* 2013;132: n/a-n/a. doi:10.1111/pbr.1991
- 902 2. Peng S, Khush GS, Virk P, Tang Q, Zou Y. Progress in ideotype breeding to increase  
903 rice yield potential. *F Crop Res.* 2008;108: 32–38. doi:10.1016/j.fcr.2008.04.001
- 904 3. Khush GS. What it will take to Feed 5.0 Billion Rice consumers in 2030. *Plant Mol Biol.*  
905 2005;59: 1–6. doi:10.1007/s11103-005-2159-5
- 906 4. Khush GS. Green revolution: the way forward. *Nat Rev Genet.* 2001;2: 815–822.  
907 doi:10.1038/35093585
- 908 5. Khush GS. Modern varieties — Their real contribution to food supply and equity.  
909 *GeoJournal.* 1995;35: 275–284. doi:10.1007/BF00989135
- 910 6. Khush GS. Breaking the yield frontier of rice. *GeoJournal.* 1995;35: 329–332.  
911 doi:10.1007/BF00989140
- 912 7. de los Reyes BG. Genomic and epigenomic bases of transgressive segregation – New  
913 breeding paradigm for novel plant phenotypes. *Plant Sci.* 2019;288: 110213.  
914 doi:10.1016/j.plantsci.2019.110213
- 915 8. Pabuayon ICM, Kitazumi A, Gregorio GB, Singh RK, de los Reyes BG. Contributions  
916 of Adaptive Plant Architecture to Transgressive Salinity Tolerance in Recombinant  
917 Inbred Lines of Rice: Molecular Mechanisms Based on Transcriptional Networks.  
918 *Frontiers in Genetics.* 2020. p. 1318. Available:  
919 <https://www.frontiersin.org/article/10.3389/fgene.2020.594569>
- 920 9. Sandhu N, Kumar A. Bridging the Rice Yield Gaps under Drought: QTLs, Genes, and  
921 their Use in Breeding Programs. *Agronomy.* 2017;7: 27.  
922 doi:10.3390/agronomy7020027
- 923 10. Dar MH, Waza SA, Shukla S, Zaidi NW, Nayak S, Hossain M, et al. Drought Tolerant

- 924 Rice for Ensuring Food Security in Eastern India. *Sustainability*. 2020;12: 2214.  
925 doi:10.3390/su12062214
- 926 11. Lei Y, Liu C, Zhang L, Luo S. How smallholder farmers adapt to agricultural drought in  
927 a changing climate: A case study in southern China. *Land use policy*. 2016;55: 300–  
928 308. doi:10.1016/j.landusepol.2016.04.012
- 929 12. Serraj R, McNally KL, Slamet-Loedin I, Kohli A, Haefele SM, Atlin G, et al. Drought  
930 Resistance Improvement in Rice: An Integrated Genetic and Resource Management  
931 Strategy. *Plant Prod Sci*. 2011;14: 1–14. doi:10.1626/pp.s.14.1
- 932 13. Lottering S, Mafongoya P, Lottering R. Drought and its impacts on small-scale farmers  
933 in sub-Saharan Africa: a review. *South African Geogr J*. 2020; 1–23.  
934 doi:10.1080/03736245.2020.1795914
- 935 14. Vikram P, Swamy BPMBM, Dixit S, Ahmed HU, Teresa Sta Cruz M, Singh AK, et al.  
936 QDTY 1.1 , a major QTL for rice grain yield under reproductive-stage drought stress  
937 with a consistent effect in multiple elite genetic backgrounds. *BMC Genet*. 2011;12.  
938 doi:10.1186/1471-2156-12-89
- 939 15. Singh R, Singh Y, Xalaxo S, Verulkar S, Yadav N, Singh S, et al. From QTL to variety-  
940 harnessing the benefits of QTLs for drought, flood and salt tolerance in mega rice  
941 varieties of India through a multi-institutional network. *Plant Sci*. 2016;242: 278–287.  
942 doi:10.1016/j.plantsci.2015.08.008
- 943 16. Swamy BPM, Kumar A, Cruz PCS, Shamsudin NAA, Boromeo TH, Palanog AD, et al.  
944 Grain yield QTLs with consistent-effect under reproductive-stage drought stress in  
945 rice. *F Crop Res*. 2014;161: 46–54. doi:10.1016/j.fcr.2014.01.004
- 946 17. Bernier J, Kumar A, Ramaiah V, Spaner D, Atlin G. A large-effect QTL for grain yield  
947 under reproductive-stage drought stress in upland rice. *Crop Sci*. 2007;47: 507–518.  
948 doi:10.2135/cropsci2006.07.0495

- 949 18. Bernier J, Kumar A, Venuprasad R, Spaner D, Verulkar S, Mandal NP, et al.  
950 Characterization of the effect of a QTL for drought resistance in rice, qtl12.1, over a  
951 range of environments in the Philippines and eastern India. *Euphytica*. 2009;166: 207–  
952 217. doi:10.1007/s10681-008-9826-y
- 953 19. Mishra KK, Vikram P, Yadaw RB, Swamy BM, Dixit S, Cruz MTS, et al. qDTY12.1: a  
954 locus with a consistent effect on grain yield under drought in rice. *BMC Genet*.  
955 2013;14: 12. doi:10.1186/1471-2156-14-12
- 956 20. Dixit S, Swamy BPM, Vikram P, Ahmed HU, Sta Cruz MT, Amante M, et al. Fine  
957 mapping of QTLs for rice grain yield under drought reveals sub-QTLs conferring a  
958 response to variable drought severities. *Theor Appl Genet*. 2012;125: 155–169.  
959 doi:10.1007/s00122-012-1823-9
- 960 21. Swamy BPM, Vikram P, Dixit S, Ahmed HU, Kumar A. Meta-analysis of grain yield  
961 QTL identified during agricultural drought in grasses showed consensus. *BMC*  
962 *Genomics*. 2011;12: 319. doi:10.1186/1471-2164-12-319
- 963 22. Yadav S, Sandhu N, Majumder RR, Dixit S, Kumar S, Singh SP, et al. Epistatic  
964 interactions of major effect drought QTLs with genetic background loci determine grain  
965 yield of rice under drought stress. *Sci Rep*. 2019;9: 2616. doi:10.1038/s41598-019-  
966 39084-7
- 967 23. Dixit S, Kumar Biswal A, Min A, Henry A, Oane RH, Raorane ML, et al. Action of  
968 multiple intra-QTL genes concerted around a co-localized transcription factor  
969 underpins a large effect QTL. *Sci Rep*. 2015;5. doi:10.1038/srep15183
- 970 24. Henry A, Stuart-Williams H, Dixit S, Kumar A, Farquhar G. Stomatal conductance  
971 responses to evaporative demand conferred by rice drought-yield quantitative trait  
972 locus qDTY12.1. *Funct Plant Biol*. 2019;46: 660. doi:10.1071/FP18126
- 973 25. Henry A, Swamy BPM, Dixit S, Torres RD, Batoto TC, Manalili M, et al. Physiological

- 974 mechanisms contributing to the QTL-combination effects on improved performance of  
975 IR64 rice NILs under drought. *J Exp Bot.* 2015;66: 1787–1799. doi:10.1093/jxb/eru506
- 976 26. Henry A, Dixit S, Mandal NP, Anantha MS, Torres R, Kumar A. Grain yield and  
977 physiological traits of rice lines with the drought yield QTL qDTY12.1 showed different  
978 responses to drought and soil characteristics in upland environments. *Funct Plant Biol.*  
979 2014;41: 1066. doi:10.1071/FP13324
- 980 27. Raorane ML, Pabuayon IM, Miro B, Kalladan R, Reza-Hajirezai M, Oane RH, et al.  
981 Variation in primary metabolites in parental and near-isogenic lines of the QTL  
982 qDTY12.1: altered roots and flag leaves but similar spikelets of rice under drought. *Mol*  
983 *Breed.* 2015;35: 1–25. doi:10.1007/s11032-015-0322-5
- 984 28. Kumar A, Dixit S, Ram T, Yadav RB, Mishra KK, Mandal NP. Breeding high-yielding  
985 drought-tolerant rice: genetic variations and conventional and molecular approaches. *J*  
986 *Exp Bot.* 2014;65: 6265–6278. doi:10.1093/jxb/eru363
- 987 29. Kitazumi A, Pabuayon ICM, Ohyanagi H, Fujita M, Osti B, Shenton MR, et al. Potential  
988 of *Oryza officinalis* to augment the cold tolerance genetic mechanisms of *Oryza sativa*  
989 by network complementation. *Sci Rep.* 2018;8: 16346. doi:10.1038/s41598-018-  
990 34608-z
- 991 30. Pabuayon ICM, Kitazumi A, Cushman KR, Singh RK, Gregorio GB, Dhatt BK, et al.  
992 Novel and transgressive salinity tolerance in recombinant inbred lines of rice created  
993 by physiological coupling-uncoupling and network rewiring effects. *Front Plant Sci.*  
994 2021. doi:10.3389/fpls.2021.615277
- 995 31. Boyle EA, Li YI, Pritchard JK. An Expanded View of Complex Traits: From Polygenic  
996 to Omnigenic. *Cell.* 2017;169: 1177–1186. doi:10.1016/j.cell.2017.05.038
- 997 32. Kumar A, Sandhu N, Venkateshwarlu C, Priyadarshi R, Yadav S, Majumder RR, et al.  
998 Development of introgression lines in high yielding, semi-dwarf genetic backgrounds to

- 999 enable improvement of modern rice varieties for tolerance to multiple abiotic stresses  
1000 free from undesirable linkage drag. *Sci Rep.* 2020;10: 13073. doi:10.1038/s41598-  
1001 020-70132-9
- 1002 33. Itoh J, Hibara K, Kojima M, Sakakibara H, Nagato Y. Rice DECUSSATE controls  
1003 phyllotaxy by affecting the cytokinin signaling pathway. *Plant J.* 2012;72: 869–881.  
1004 doi:10.1111/j.1365-313x.2012.05123.x
- 1005 34. Torres R, Henry A, Kumar A. Methodologies for managed drought stress experiments  
1006 in the field. In: Shashidhar HE, Henry A, Hardy B, editors. *Methodologies for root*  
1007 *drought studies in rice.* Los Banos, Phillipines: International Rice Research Institute;  
1008 2012. pp. 43–50.
- 1009 35. Bechtold U, Field B. Molecular mechanisms controlling plant growth during abiotic  
1010 stress. *J Exp Bot.* 2018;69: 2753–2758. doi:10.1093/jxb/ery157
- 1011 36. Fracasso A, Trindade LM, Amaducci S. Drought stress tolerance strategies revealed  
1012 by RNA-Seq in two sorghum genotypes with contrasting WUE. *BMC Plant Biol.*  
1013 2016;16: 115. doi:10.1186/s12870-016-0800-x
- 1014 37. Bhogireddy S, Xavier A, Garg V, Layland N, Arias R, Payton P, et al. Genome-wide  
1015 transcriptome and physiological analyses provide new insights into peanut drought  
1016 response mechanisms. *Sci Rep.* 2020;10: 4071. doi:10.1038/s41598-020-60187-z
- 1017 38. Boonjung H, Fukai S. Effects of soil water deficit at different growth stages on rice  
1018 growth and yield under upland conditions. 2. Phenology, biomass production and  
1019 yield. *F Crop Res.* 1996;48: 47–55. doi:https://doi.org/10.1016/0378-4290(96)00039-1
- 1020 39. Zhang J, Zhang S, Cheng M, Jiang H, Zhang X, Peng C, et al. Effect of Drought on  
1021 Agronomic Traits of Rice and Wheat: A Meta-Analysis. *Int J Environ Res Public*  
1022 *Health.* 2018;15: 839. doi:10.3390/ijerph15050839
- 1023 40. Sakai H, Lee SS, Tanaka T, Numa H, Kim J, Kawahara Y, et al. Rice Annotation

- 1024 Project Database (RAP-DB): An Integrative and Interactive Database for Rice  
1025 Genomics. *Plant Cell Physiol.* 2013;54: e6–e6. doi:10.1093/pcp/pcs183
- 1026 41. Sato Y, Namiki N, Takehisa H, Kamatsuki K, Minami H, Ikawa H, et al. RiceFRIEND: a  
1027 platform for retrieving coexpressed gene networks in rice. *Nucleic Acids Res.*  
1028 2012/11/23. 2013;41: D1214–D1221. doi:10.1093/nar/gks1122
- 1029 42. Andersen SU, Algreen-Petersen RG, Hoedl M, Jurkiewicz A, Cvitanich C,  
1030 Braunschweig U, et al. The conserved cysteine-rich domain of a tesmin/TSO1-like  
1031 protein binds zinc in vitro and TSO1 is required for both male and female fertility in  
1032 *Arabidopsis thaliana*. *J Exp Bot.* 2007;58: 3657–3670. doi:10.1093/jxb/erm215
- 1033 43. Wang Y, Zhang W-Z, Song L-F, Zou J-J, Su Z, Wu W-H. Transcriptome Analyses  
1034 Show Changes in Gene Expression to Accompany Pollen Germination and Tube  
1035 Growth in *Arabidopsis*. *Plant Physiol.* 2008;148: 1201–1211.  
1036 doi:10.1104/pp.108.126375
- 1037 44. Hauser BA, He JQ, Park SO, Gasser CS. TSO1 is a novel protein that modulates  
1038 cytokinesis and cell expansion in *Arabidopsis*. *Development.* 2000;127: 2219–2226.  
1039 doi:10.1590/0104-07072017005650015
- 1040 45. Sijacic P, Wang W, Liu Z. Recessive Antimorphic Alleles Overcome Functionally  
1041 Redundant Loci to Reveal TSO1 Function in *Arabidopsis* Flowers and Meristems. Qu  
1042 L-J, editor. *PLoS Genet.* 2011;7: e1002352. doi:10.1371/journal.pgen.1002352
- 1043 46. Klepikova A V., Kasianov AS, Gerasimov ES, Logacheva MD, Penin AA. A high  
1044 resolution map of the *Arabidopsis thaliana* developmental transcriptome based on  
1045 RNA-seq profiling. *Plant J.* 2016;88: 1058–1070. doi:10.1111/tpj.13312
- 1046 47. Reguera M, Peleg Z, Abdel-Tawab YM, Tumimbang EB, Delatorre CA, Blumwald E.  
1047 Stress-Induced Cytokinin Synthesis Increases Drought Tolerance through the  
1048 Coordinated Regulation of Carbon and Nitrogen Assimilation in Rice. *PLANT Physiol.*

- 1049 2013;163: 1609–1622. doi:10.1104/pp.113.227702
- 1050 48. D'Aloia M, Bonhomme D, Bouché F, Tamseddak K, Ormenese S, Torti S, et al.  
1051 Cytokinin promotes flowering of Arabidopsis via transcriptional activation of the FT  
1052 paralogue TSF. *Plant J.* 2011;65: 972–979. doi:10.1111/j.1365-313X.2011.04482.x
- 1053 49. Bartrina I, Otto E, Strnad M, Werner T, Schmülling T. Cytokinin Regulates the Activity  
1054 of Reproductive Meristems, Flower Organ Size, Ovule Formation, and Thus Seed  
1055 Yield in Arabidopsis thaliana. *Plant Cell.* 2011;23: 69–80. doi:10.1105/tpc.110.079079
- 1056 50. Murai N. Review: Plant Growth Hormone Cytokinins Control the Crop Seed Yield. *Am*  
1057 *J Plant Sci.* 2014;05: 2178–2187. doi:10.4236/ajps.2014.514231
- 1058 51. Zahir ZA, Asghar HN, Arshad M. Cytokinin and its precursors for improving growth and  
1059 yield of rice. *Soil Biol Biochem.* 2001;33: 405–408. doi:10.1016/S0038-  
1060 0717(00)00145-0
- 1061 52. Jameson PE, Song J. Cytokinin: a key driver of seed yield. *J Exp Bot.* 2016;67: 593–  
1062 606. doi:10.1093/jxb/erv461
- 1063 53. Wang M, Lu X, Xu G, Yin X, Cui Y, Huang L, et al. OsSGL, a novel pleiotropic stress-  
1064 related gene enhances grain length and yield in rice. *Sci Rep.* 2016;6: 38157.  
1065 doi:10.1038/srep38157
- 1066 54. Inukai Y, Nagato Y, Nonomura K-I, Kitano H, Itoh J-I, Yamaki S, et al. Rice Plant  
1067 Development: from Zygote to Spikelet. *Plant Cell Physiol.* 2005;46: 23–47.  
1068 doi:10.1093/pcp/pci501
- 1069 55. Hassani-Pak K. KnetMiner - An integrated data platform for gene mining and biological  
1070 knowledge discovery. Universität Bielefeld. 2017.
- 1071 56. Wu J, Lawit SJ, Weers B, Sun J, Mongar N, Van Hemert J, et al. Overexpression of  
1072 zmm28 increases maize grain yield in the field. *Proc Natl Acad Sci.* 2019/11/04.  
1073 2019;116: 23850–23858. doi:10.1073/pnas.1902593116

- 1074 57. Becker A, Theißen G. The major clades of MADS-box genes and their role in the  
1075 development and evolution of flowering plants. *Mol Phylogenet Evol.* 2003;29: 464–  
1076 489. doi:[https://doi.org/10.1016/S1055-7903\(03\)00207-0](https://doi.org/10.1016/S1055-7903(03)00207-0)
- 1077 58. Ng M, Yanofsky MF. FUNCTION AND EVOLUTION OF THE PLANT MADS-BOX  
1078 GENE FAMILY. *Nat Rev Genet.* 2001;2: 186–195.  
1079 doi:<http://dx.doi.org/10.1038/35056041>
- 1080 59. Kater MM, Dreni L, Colombo L. Functional conservation of MADS-box factors  
1081 controlling floral organ identity in rice and Arabidopsis. *J Exp Bot.* 2006;57: 3433–  
1082 3444. doi:10.1093/jxb/erl097
- 1083 60. Ghimire KH, Quiatchon LA, Vikram P, Swamy BPM, Dixit S, Ahmed H, et al.  
1084 Identification and mapping of a QTL (qDTY1.1) with a consistent effect on grain yield  
1085 under drought. *F Crop Res.* 2012;131: 88–96.  
1086 doi:<https://doi.org/10.1016/j.fcr.2012.02.028>
- 1087 61. Sandhu N, Singh A, Dixit S, Sta Cruz MT, Maturan PC, Jain RK, et al. Identification  
1088 and mapping of stable QTL with main and epistasis effect on rice grain yield under  
1089 upland drought stress. *BMC Genet.* 2014;15: 1–15. doi:10.1186/1471-2156-15-63
- 1090 62. Vikram P, Swamy BPMM, Dixit S, Trinidad J, Cruz MTS, Maturan PC, et al. Linkages  
1091 and Interactions Analysis of Major Effect Drought Grain Yield QTLs in Rice. *PLoS*  
1092 *One.* 2016;11: e0151532. doi:10.1371/journal.pone.0151532
- 1093 63. Han J-H, Shin N-H, Moon J-H, Yi C, Yoo S-C, Chin JH. Genetic and Phenotypic  
1094 Characterization of Rice Backcrossed Inbred Sister Lines of Saltol in Temperate  
1095 Saline Reclaimed Area. *Plant Breed Biotechnol.* 2020/03/01. 2020;8: 58–68.  
1096 doi:10.9787/PBB.2020.8.1.58
- 1097 64. Rahman MA, Haque ME, Sikdar B, Islam MA, Matin M. Correlation Analysis of Flag  
1098 Leaf with Yield in Several Rice Cultivars. *J Life Earth Sci.* 2014;8.



- 1099 doi:10.3329/jles.v8i0.20139
- 1100 65. Abdalla Basyouni Abou-Khalifa A, Misra AN, El-Azeem M Salem AK. Effect of leaf  
1101 cutting on physiological traits and yield of two rice cultivars. *African J Plant Sci.*  
1102 2008;2: 147–150. Available: <http://www.academicjournals.org/AJPS>
- 1103 66. Cui K, Peng S, Xing Y, Yu S, Xu C, Zhang Q. Molecular dissection of the genetic  
1104 relationships of source, sink and transport tissue with yield traits in rice. *Theor Appl*  
1105 *Genet.* 2003;106: 649–658. doi:10.1007/s00122-002-1113-z
- 1106 67. Yoshida S. *Fundamentals of Rice Crop Science*. Los Banos, Philippines: International  
1107 Rice Research Institute; 1981.
- 1108 68. Counce PA, Keisling TC, Mitchell AJ. A Uniform, Objective, and Adaptive System for  
1109 Expressing Rice Development. *Crop Sci.* 2000;40: 436–443.  
1110 doi:<https://doi.org/10.2135/cropsci2000.402436x>
- 1111 69. Torres RO, Henry A. Yield stability of selected rice breeding lines and donors across  
1112 conditions of mild to moderately severe drought stress. *F Crop Res.* 2018;220.  
1113 doi:10.1016/j.fcr.2016.09.011
- 1114 70. To JPC, Haberer G, Ferreira FJ, Deruère J, Mason MG, Schaller GE, et al. Type-A  
1115 Arabidopsis Response Regulators Are Partially Redundant Negative Regulators of  
1116 Cytokinin Signaling. *Plant Cell.* 2004/02/18. 2004;16: 658–671.  
1117 doi:10.1105/tpc.018978
- 1118 71. Hill K, Mathews DE, Kim HJ, Street IH, Wildes SL, Chiang Y-H, et al. Functional  
1119 Characterization of Type-B Response Regulators in the Arabidopsis Cytokinin  
1120 Response. *Plant Physiol.* 2013;162: 212 LP – 224. doi:10.1104/pp.112.208736
- 1121 72. Xie M, Chen H, Huang L, O’Neil RC, Shokhirev MN, Ecker JR. A B-ARR-mediated  
1122 cytokinin transcriptional network directs hormone cross-regulation and shoot  
1123 development. *Nat Commun.* 2018;9: 1–13. doi:10.1038/s41467-018-03921-6

- 1124 73. Ashikari M. Cytokinin Oxidase Regulates Rice Grain Production. *Science* (80- ).  
1125 2005;309: 741–745. doi:10.1126/science.1113373
- 1126 74. Peleg Z, Reguera M, Tumimbang E, Walia H, Blumwald E. Cytokinin-mediated  
1127 source/sink modifications improve drought tolerance and increase grain yield in rice  
1128 under water-stress. *Plant Biotechnol J*. 2011;9: 747–758. doi:10.1111/j.1467-  
1129 7652.2010.00584.x
- 1130 75. Qin H, Zhang Y, Sun L, Gu Q, Kuppu S, Zhang H, et al. Regulated Expression of an  
1131 Isopentenyltransferase Gene (IPT) in Peanut Significantly Improves Drought  
1132 Tolerance and Increases Yield Under Field Conditions. *Plant Cell Physiol*. 2011;52:  
1133 1904–1914. doi:10.1093/pcp/pcr125
- 1134 76. Zhu X, Sun L, Kuppu S, Hu R, Mishra N, Smith J, et al. The yield difference between  
1135 wild-type cotton and transgenic cotton that expresses IPT depends on when water-  
1136 deficit stress is applied. *Sci Rep*. 2018;8: 2538. doi:10.1038/s41598-018-20944-7
- 1137 77. Kuppu S, Mishra N, Hu R, Sun L, Zhu X, Shen G, et al. Water-deficit inducible  
1138 expression of a cytokinin biosynthetic gene IPT improves drought tolerance in cotton.  
1139 *PLoS One*. 2013;8: e64190–e64190. doi:10.1371/journal.pone.0064190
- 1140 78. Henry A, Stuart-Williams B H, Dixit S, Kumar A, Farquhar G. Stomatal conductance  
1141 responses to evaporative demand conferred by rice drought-yield quantitative trait  
1142 locus qDTY 12.1. doi:10.1071/FP18126
- 1143 79. Raorane ML, Pabuayon IM, Varadarajan AR, Mutte SK, Kumar A, Treumann A, et al.  
1144 Proteomic insights into the role of the large-effect QTL qDTY 12.1 for rice yield under  
1145 drought. *Mol Breed*. 2015;35: 139. doi:10.1007/s11032-015-0321-6
- 1146 80. Lee YS, An G. Regulation of flowering time in rice. *J Plant Biol*. 2015;58: 353–360.  
1147 doi:10.1007/s12374-015-0425-x
- 1148 81. Fornara F, Pařenicová L, Falasca G, Pelucchi N, Masiero S, Ciannamea S, et al.

- 1149 Functional Characterization of OsMADS18, a Member of the AP1/SQUA Subfamily of  
1150 MADS Box Genes. *Plant Physiol.* 2004;135: 2207–2219. Available:  
1151 <http://www.jstor.org/stable/4356576>
- 1152 82. Kumar A, Verulkar S, Dixit S, Chauhan B, Bernier J, Venuprasad R, et al. Yield and  
1153 yield-attributing traits of rice (*Oryza sativa* L.) under lowland drought and suitability of  
1154 early vigor as a selection criterion. *F Crop Res.* 2009;114: 99–107.  
1155 doi:10.1016/j.fcr.2009.07.010
- 1156 83. Pantuwan G, Fukai S, Cooper M, Rajatasereekul S, O'Toole JC. Yield response of rice  
1157 (*Oryza sativa* L.) genotypes to different types of drought under rainfed lowlands. Part  
1158 1. Grain yield and yield components. *F Crop Res.* 2002;73: 153–168.
- 1159 84. Saluja D, Vassallo MF, Tanese N. Distinct Subdomains of Human TAFII130 Are  
1160 Required for Interactions with Glutamine-Rich Transcriptional Activators. *Mol Cell Biol.*  
1161 1998;18: 5734–5743. doi:10.1128/MCB.18.10.5734
- 1162 85. Freiman RN, Tjian R. A Glutamine-Rich Trail Leads to Transcription Factors. *Science*  
1163 (80- ). 2002;296: 2149 LP – 2150. doi:10.1126/science.1073845
- 1164 86. Ding Y-H, Liu N-Y, Tang Z-S, Liu J, Yang W-C. Arabidopsis GLUTAMINE-RICH  
1165 PROTEIN23 Is Essential for Early Embryogenesis and Encodes a Novel Nuclear PPR  
1166 Motif Protein That Interacts with RNA Polymerase II Subunit III. *Plant Cell.* 2006/02/17.  
1167 2006;18: 815–830. doi:10.1105/tpc.105.039495
- 1168 87. Rahman S, Sowa ME, Ottinger M, Smith JA, Shi Y, Harper JW, et al. The Brd4  
1169 Extraterminal Domain Confers Transcription Activation Independent of pTEFb by  
1170 Recruiting Multiple Proteins, Including NSD3. *Mol Cell Biol.* 2011;31: 2641–2652.  
1171 doi:10.1128/MCB.01341-10
- 1172 88. Wu S-Y, Chiang C-M. The Double Bromodomain-containing Chromatin Adaptor Brd4  
1173 and Transcriptional Regulation. *J Biol Chem.* 2007;282: 13141–13145.

- 1174 doi:10.1074/jbc.R700001200
- 1175 89. Huang X-Y, Chao D-Y, Gao J-P, Zhu M-Z, Shi M, Lin H-X. A previously unknown zinc  
1176 finger protein, DST, regulates drought and salt tolerance in rice via stomatal aperture  
1177 control. *Genes Dev.* 2009;23: 1805–1817. doi:10.1101/gad.1812409
- 1178 90. Li S, Zhao B, Yuan D, Duan M, Qian Q, Tang L, et al. Rice zinc finger protein DST  
1179 enhances grain production through controlling Gn1a/OsCKX2 expression. *Proc Natl  
1180 Acad Sci.* 2013;110: 3167–3172. doi:10.1073/pnas.1300359110
- 1181 91. Zürcher E, Müller B. Cytokinin Synthesis, Signaling, and Function—Advances and  
1182 New Insights. In: Jeon KWBT-IR of C and MB, editor. *International Review of Cell and  
1183 Molecular Biology.* Academic Press; 2016. pp. 1–38.  
1184 doi:<https://doi.org/10.1016/bs.ircmb.2016.01.001>
- 1185 92. Hwang I, Sheen J, Müller B. Cytokinin Signaling Networks. *Annu Rev Plant Biol.*  
1186 2012;63: 353–380. doi:10.1146/annurev-arplant-042811-105503
- 1187 93. El-Showk S, Ruonala R, Helariutta Y. Crossing paths: Cytokinin signalling and  
1188 crosstalk. *Dev.* 2013;140: 1373–1383. doi:10.1242/dev.086371
- 1189 94. Kim SL, Lee S, Kim HJ, Nam HG, An G. OsMADS51 is a short-day flowering promoter  
1190 that functions upstream of Ehd1, OsMADS14, and Hd3a. *Plant Physiol.* 2007/10/19.  
1191 2007;145: 1484–1494. doi:10.1104/pp.107.103291
- 1192 95. Weng X, Wang L, Wang J, Hu Y, Du H, Xu C, et al. Grain Number, Plant Height, and  
1193 Heading Date7 is a central regulator of growth, development, and stress response.  
1194 *Plant Physiol.* 2014;164: 735–747. doi:10.1104/pp.113.231308
- 1195 96. Yoshida H, Nagato Y. Flower development in rice. *J Exp Bot.* 2011;62: 4719–4730.  
1196 doi:10.1093/jxb/err272
- 1197 97. Davies WJ, Wilkinson S, Veselov DS, Kudoyarova GR, Arkhipova TN. Plant hormone  
1198 interactions: innovative targets for crop breeding and management. *J Exp Bot.*

- 1199 2012;63: 3499–3509. doi:10.1093/jxb/ers148
- 1200 98. Kim EH, Kim YS, Park SH, Koo YJ, Choi Y Do, Chung YY, et al. Methyl jasmonate  
1201 reduces grain yield by mediating stress signals to alter spikelet development in rice.  
1202 Plant Physiol. 2009;149: 1751–1760. doi:10.1104/pp.108.134684
- 1203 99. Tuteja N. Abscisic Acid and Abiotic Stress Signaling. Plant Signal Behav. 2007;2:  
1204 135–138. doi:10.4161/psb.2.3.4156
- 1205 100. Finkelstein RR, Rock CD. Abscisic Acid Biosynthesis and Response. Arab B.  
1206 2002;2002. doi:10.1199/tab.0058
- 1207 101. Zhang J, Jia W, Yang J, Ismail AM. Role of ABA in integrating plant responses to  
1208 drought and salt stresses. F Crop Res. 2006;97: 111–119.  
1209 doi:10.1016/j.fcr.2005.08.018
- 1210 102. Taylor IB, Burbidge A, Thompson AJ. Control of abscisic acid synthesis. J Exp Bot.  
1211 2000;51: 1563–1574. doi:10.1093/jexbot/51.350.1563
- 1212 103. Verma V, Ravindran P, Kumar PP. Plant hormone-mediated regulation of stress  
1213 responses. BMC Plant Biol. 2016;16: 86. doi:10.1186/s12870-016-0771-y
- 1214 104. Kumar A, Bernier J, Verulkar S, Lafitte HR, Atlin GN. Breeding for drought tolerance:  
1215 Direct selection for yield, response to selection and use of drought-tolerant donors in  
1216 upland and lowland-adapted populations. F Crop Res. 2008;107: 221–231.  
1217 doi:10.1016/j.fcr.2008.02.007
- 1218 105. Dixit S, Singh A, Kumar A. Rice breeding for high grain yield under drought: A  
1219 strategic solution to a complex problem. Int J Agron. 2014;2014.  
1220 doi:10.1155/2014/863683
- 1221 106. Villa JE, Henry A, Xie F, Serraj R. Hybrid rice performance in environments of  
1222 increasing drought severity. F Crop Res. 2012;125: 14–24.  
1223 doi:10.1016/j.fcr.2011.08.009

- 1224 107. Torres RO, Henry A. Yield stability of selected rice breeding lines and donors across  
1225 conditions of mild to moderately severe drought stress. *F Crop Res.* 2018;220.  
1226 doi:10.1016/j.fcr.2016.09.011
- 1227 108. Torres RO, McNally KL, Cruz CV, Serraj R, Henry A. Screening of rice Genebank  
1228 germplasm for yield and selection of new drought tolerance donors. *F Crop Res.*  
1229 2013;147: 12–22. doi:<https://doi.org/10.1016/j.fcr.2013.03.016>
- 1230 109. Henry A, Gowda VRP, Torres RO, McNally KL, Serraj R. Variation in root system  
1231 architecture and drought response in rice (*Oryza sativa*): Phenotyping of the  
1232 *Oryza*SNP panel in rainfed lowland fields. *F Crop Res.* 2011;120: 205–214.  
1233 doi:<https://doi.org/10.1016/j.fcr.2010.10.003>
- 1234 110. Martin M. Cutadapt removes adapter sequences from high-throughput sequencing  
1235 reads. *EMBnet.journal.* 2011;17: 10. doi:10.14806/ej.17.1.200
- 1236 111. Kim D, Salzberg SL. TopHat-Fusion: an algorithm for discovery of novel fusion  
1237 transcripts. *Genome Biol.* 2011;12: R72. doi:10.1186/gb-2011-12-8-r72
- 1238 112. Trapnell C, Williams BA, Pertea G, Mortazavi A, Kwan G, van Baren MJ, et al.  
1239 Transcript assembly and quantification by RNA-Seq reveals unannotated transcripts  
1240 and isoform switching during cell differentiation. *Nat Biotechnol.* 2010/05/02. 2010;28:  
1241 511–515. doi:10.1038/nbt.1621
- 1242 113. Kærn M, Elston TC, Blake WJ, Collins JJ. Stochasticity in gene expression: from  
1243 theories to phenotypes. *Nat Rev Genet.* 2005;6: 451–464. doi:10.1038/nrg1615
- 1244 114. Schwabe A, Dobrzyński M, Rybakova K, Verschure P, Bruggeman FJ. Origins of  
1245 Stochastic Intracellular Processes and Consequences for Cell-to-Cell Variability and  
1246 Cellular Survival Strategies. In: Jameson D, Verma M, Westerhoff HVBT-M in E,  
1247 editors. *Methods in Systems Biology.* Academic Press; 2011. pp. 597–625.  
1248 doi:10.1016/B978-0-12-385118-5.00028-1

- 1249 115. De Vos D, Bruggeman FJ, Westerhoff H V, Bakker BM. How Molecular Competition  
1250 Influences Fluxes in Gene Expression Networks. PLoS One. 2011;6: e28494.  
1251 Available: <https://doi.org/10.1371/journal.pone.0028494>
- 1252 116. Shu X, Singh M, Karampudi NBR, Bridges DF, Kitazumi A, Wu VCH, et al. Xenobiotic  
1253 Effects of Chlorine Dioxide to Escherichia coli O157:H7 on Non-host Tomato  
1254 Environment Revealed by Transcriptional Network Modeling: Implications to  
1255 Adaptation and Selection . Frontiers in Microbiology . 2020. p. 1122. Available:  
1256 <https://www.frontiersin.org/article/10.3389/fmicb.2020.01122>
- 1257 117. MacNeil LT, Walhout AJM. Gene regulatory networks and the role of robustness and  
1258 stochasticity in the control of gene expression. Genome Research. 2011.  
1259 doi:10.1101/gr.097378.109
- 1260 118. Alonso JM, Stepanova AN, Leisse TJ, Kim CJ, Chen H, Shinn P, et al. Genome-wide  
1261 insertional mutagenesis of Arabidopsis thaliana. Science (80- ). 2003;301: 653–657.  
1262 doi:10.1126/science.1086391
- 1263 119. Harb A, Pereira A. Screening Arabidopsis Genotypes for Drought Stress Resistance.  
1264 Plant Reverse Genetics Methods in Molecular Biology (Methods and Protocols).  
1265 Totowa, NJ: Humana Press; 2011. pp. 191–198.  
1266  
1267  
1268  
1269  
1270  
1271  
1272  
1273

1274 **Figure Legends**

1275 **Fig 1. Synthesis and integration of all available data on relative agronomic and**

1276 **yield performances across the minimal comparative panel during progressive**

1277 **drought.** Data from previous years of agronomic trials were integrated with the data

1278 collected from the 2017 wet season experiment performed for transcriptome studies.

1279 **(A)** Published grain yield results (GY; kg ha<sup>-1</sup>) **[22]** had significantly lower drought-

1280 mediated yield penalty (orange line) in LPB compared to the other genotypes. **(B)**

1281 Grain yield (g plot<sup>-1</sup>, n = 3, means ± s.e.) from the wet season-2017 experiment

1282 recapitulated the trends in previous years (orange line). **(C)** Drought-induced

1283 flowering delay (orange line) from published results **[22]** was also much less severe

1284 in LPB compared to the other genotypes. Trends in the **(D)** number of reproductive

1285 tillers per plant, **(E)** panicle length, **(F)** number of tillers per plant, **(G)** biomass per

1286 plant, and **(H)** plant height reiterated the superiority of LPB. Significant differences in

1287 flowering delay coupled with yield component reduction implied the earlier formation

1288 of reproductive sinks under drought in LPB, thus reducing grain yield penalty. LPB –

1289 Low Penalty BIL; HPB – High Penalty BIL; WR – Way Rarem (*qDTY12.1* donor);

1290 IR64 – rice mega variety (recurrent parent). Box plots with similar letters are not

1291 statistically significant at p < 0.05 using Tukey HSD (n=6).

1292

1293 **Fig 2. General trends in the transcriptomic fluxes across genotypes revealed**

1294 **by the filtered and un-filtered Propensity values of the global, transcription**

1295 **factor, and stress-related windows of the transcriptomes.** **(A)** Hierarchical

1296 clustering of unfiltered global (27,786 loci), transcription factor (1,340 loci) and stress-



1297 related (2,589 loci) datasets. Expression fluxes at the vegetative stage under  
1298 irrigated conditions highlight similarities between siblings (LPB, HPB) and WR but not  
1299 IR64. Expression fluxes at the booting stage revealed the uniqueness of LPB, while  
1300 grain-filling stage fluxes revealed high similarities across all genotypes. **(B)** Filtered  
1301 ( $-0.3 \leq Propensity \leq +0.3$ ) transcriptome datasets included 384 (global), 410  
1302 (transcription factor), and 833 (stress-related) gene loci. This comparison  
1303 recapitulated the general trends in the unfiltered datasets and further underscored  
1304 the uniqueness of LPB, particularly during booting (red boxes). On a locus-by-locus  
1305 comparison, during booting stage in LPB appeared to be well conserved between  
1306 irrigated and drought. Fluxes in HPB, WR, and IR64 reflected a state of perturbation.  
1307

1308 **Fig 3. Differences in the directional character of transcriptomic fluxes across**  
1309 **genotypes.** Propensity scores of **(A)** global (25,786 loci), **(B)** transcription factor  
1310 (1,340 loci), and **(C)** stress-related (2,589 loci) windows were divided into positive  
1311 propensity (PPF) and negative propensity (NPF) fractions, excluding Propensity = 0.  
1312 Directional characters were positive skew (upward arrow; PPF>NPF), negative skew  
1313 (downward arrow; NPF>PPF) or neutral (line without arrow). Global, transcription  
1314 factor, and stress-related windows showed negative skew in LPB, positive skew in  
1315 HPB and WR, and neutral in IR64 at booting stage under drought (red boxes). The  
1316 downward directional character of the LPB transcriptome at booting under drought  
1317 illustrated a '*tamed*' transcriptional landscape. Upward directional character in HPB  
1318 and WR alluded to an '*untamed*' or noisy transcriptional landscape.  
1319

1320 **Fig 4. Expression profiles of *qDTY12.1* genes across the spatio-temporal**  
1321 **windows of the transcriptomics experiments.** Eighteen (18) of the fifty (50)  
1322 *qDTY12.1* genes had measurable expression. The annotated protein-coding genes  
1323 were organized by their location on Chromosome-12 (y-axis) and their FPKM-based  
1324 expression values (yellow = Low; dark blue = High) and plotted across vegetative,  
1325 booting, grain-filling stages under irrigated and drought conditions (x-axis).  
1326 Expression is shown for genes with FPKM > 0 (green rectangles) and FPKM = 0 (red  
1327 rectangles) under irrigated (C – control) or drought (S – stress) conditions.

1328

1329 **Fig 5. Co-expression of eighteen *qDTY12.1* genes revealed by RiceFRIEND**  
1330 **analysis. (A)** None of the 18 expressed *qDTY12.1* genes had significant co-  
1331 expression alliances with each other. However, twelve (12) genes had co-expression  
1332 alliances with genes outside of *qDTY12.1*, particularly in LPB. The *Os12g0465700*  
1333 (*OsDEC*) had significant co-expression with two transcription factors  
1334 (*Os08g0159800*, *Os05g0509400*) involved in floral meristem functions and singled  
1335 out as the primary yield-related candidate gene. **(B)** *OsDEC* expression across the  
1336 genotypic panel at vegetative, booting, and grain-filling stages under irrigated (C) and  
1337 drought (ST) conditions. *OsDEC* was induced by drought at booting stage only in  
1338 LPB and first reported to have important roles in cytokinin signaling [33].

1339 **Fig 6. Direct significance of *OsDEC* to yield potential based on heterologous**  
1340 **dissection of T-DNA insertion mutants of two orthologous gene copies. (A)**  
1341 Growth chamber drought experiments on *Arabidopsis thaliana* ecotype Col-0 and  
1342 mutants (*At5G17510* = 5Gm, *At3G03460* = 3Gm) mirrored the designs of the drought

1343 experiments in rice (S2 Fig). Drought was initiated eight (8) days before bolting  
1344 (reproductive initiation) and lasted for 14 days, after which plants were re-watered to  
1345 field capacity until maturity. **(B)** Transcript abundance analysis by qRT-PCR showing  
1346 the silenced *At5G17510* (5Gm) and *At3G03460* (3Gm) relative to the expression in  
1347 wild-type Col-0 at day-14. **(C)** Boxplots showing the effects of the loss of *DEC*  
1348 expression to plant biomass and seed yield. Significant reductions in seed yield  
1349 under drought are evident in 5Gm and 3Gm ( $p < 0.001$ ) but not in Col-0, while  
1350 significant reductions in dry biomass under drought are evident in 3Gm ( $p < 0.001$ )  
1351 but not in Col-0 and 5Gm. Post-hoc comparison of means (all pairs;  $\alpha = 0.05$ ) was  
1352 through significant ANOVA using Tukey-HSD: \*\*\* significant at  $p < 0.001$ .

1353

1354 **Fig 7. Co-expression of *OsDEC* with genes involved in the regulation of**  
1355 **flowering at booting stage in LPB. (A)** Hierarchical clustering of Propensity values  
1356 for *OsDEC* and other genes ( $n = 195$ ) associated with cytokinin signaling. A robust  
1357 cohort of 30 genes with common ontology (GO) of cytokinin, flowering, and  
1358 inflorescence were extracted (red box) from the LPB transcriptome. Refinement  
1359 using a Propensity threshold of  $n \geq 0.5$  identified 11 genes with highly significant co-  
1360 expression. **(B)** Hierarchical clustering of FPKM-based expression established the  
1361 six-gene network hub, comprised of *OsDEC*, *OsLOGL3*, *OsMADS15*, *OsPHP3*,  
1362 *OsFOR1*, and *OsMADS14* characterized by GO for cytokinin signaling, inflorescence  
1363 meristem identity, and floral organ regulation.

1364

1365 **Fig 8. Differential organization of *DEC*-network showing the uniqueness of**  
1366 **LPB.** High similarities in *OsDEC* network were evident across all genotypes at  
1367 vegetative and grain-filling stages. **(A)** Hierarchical clustering of FPKM-based  
1368 transcript abundances revealed 13 clades of co-expressed genes surrounding the  
1369 *DEC*-network hub. Clades-7 and -8 (red box with asterisk) contained 36 genes that  
1370 were highly co-expressed with *OsDEC*. **(B)** Final composition of the *DEC*-network of  
1371 LPB based on hierarchical clustering of FPKM-based transcript abundances. The  
1372 ‘core’ of the network consisted of *OsDEC* (36\*), *OsMADS15* (26), and *OsMADS51*  
1373 (03), all of which are directly involved with meristem transition from vegetative to  
1374 reproductive. The other 33 genes formed the peripheral components with direct  
1375 linkages to reproductive functions. **(C-E)** Hierarchical clustering of FPKM-based  
1376 transcript abundances across the 36-member *DEC*-network. Numbers to the right of  
1377 dendograms (Locus ID, position, annotation, etc.) are detailed in S4 Table. Red  
1378 asterisk marks the position of *OsDEC*. C – Control/irrigated; S – Stress/drought.  
1379

1380 **Fig 9. Organization of the booting stage *DEC*-network across genotypes.** The  
1381 *OsDEC* formed networks with other genes in the genetic background, and the  
1382 network is highly organized in LPB but not in the other genotypes, where  
1383 homologous networks appeared fragmented and disorganized. **(A)** The organization  
1384 and expression character of the *DEC*-network at booting stage are distinct in each  
1385 genotype. In LPB, the network is characterized by an inductive pattern while a static  
1386 pattern was evident in HPB, WR, and IR64. **(B)** Distribution of the members of the  
1387 functional *DEC*-network across the rice genome outside of *qDTY12.1*. Numbers to

1388 the right of the dendograms are described (Locus ID, position, annotation, etc.) in S4  
1389 Table. Number with red asterisk indicate the position of *OsDEC*. C –  
1390 Control/irrigated; S – Stress/drought.

1391

1392 **Fig 10. KnetMiner knowledge integration map depicting the biological functions**  
1393 **associated with the operative booting stage-specific *DEC*-network in LPB.**

1394 The knowledge integration map linked all but one of the 36 genes to various yield  
1395 component traits including grains per plant, tillers per plant, grain length and width,  
1396 panicle length, amylose content, carbon isotope discrimination, days to flowering,  
1397 days to heading, spikelet number and fertility, and grain yield. The complete list of  
1398 traits generated by the KnetMiner are summarized in S5 Table.

1399

1400 **Fig 11. Expression of critical MADS-box transcription factors at booting stage**  
1401 **in LPB mimic the signature of *OsDEC*.** The temporal expression of *OsDEC* and  
1402 three MADS-box transcription factors point to a mechanism for regulating flowering-  
1403 time under drought. **(A-D)** FPKM-based expression plots of *OsDEC*, *OsMADS14*,  
1404 *OsMADS15*, and *OsMADS18* across growth conditions (irrigated, drought) and  
1405 developmental stages. *OsMADS14*, *OsMADS15*, *OsMADS18* (documented to be  
1406 intimately involved in flowering and meristem identity) were induced by drought at  
1407 booting stage (red boxes) in LPB and IR64, but not in HPB and WR. Expression of  
1408 *OsMADS18* across developmental stages mimicked the overexpression (OE) of  
1409 *ZMM28* (maize ortholog) that led to improved growth and yield [56]. VEG-C  
1410 (vegetative control/irrigated); VEG-ST (vegetative stress/drought); BOOT-C (booting

1411 control/irrigated); BOOT-ST (booting stress/drought); GF-C (grain-filling  
1412 control/irrigated); GF-ST (grain-filling stress/drought).

1413

1414 **Fig 12. Putative molecular mechanism of the *DEC*-network modeled through  
1415 the integration of relevant information from the literature with the trends**

1416 **uncovered from the flag leaf drought transcriptomes.** In concert with other genes

1417 (peripheral) across the genetic background, *OsDEC* anchors a network that

1418 effectively mediates early transition to reproduction, thereby facilitating processes

1419 critical for grain productivity under drought. Transition of the meristem from

1420 vegetative to reproductive stage is mediated by cytokinin through the phospho-

1421 transfer system (*OsAHP1*, *OsPHP5*) leading to the enhancement of active cytokinin

1422 pools through the expression of the biosynthetic genes *OsLOGL3* and *OsLOGL7*,

1423 and concomitant suppression of *OsCKX2* involved in degradation. Induction of

1424 spikelet development is promoted by *OsMADS14*, *OsMADS15*, *OsMADS18*, and

1425 *OsMADS51*, and *OsHd3a* (florigen), which trigger the early onset of flowering under

1426 drought. Early formation of reproductive sink efficiently redirects the photosynthate to

1427 reproductive processes. The '*taming*' effect of ABA response (*OsLLB*, *OsABL1*)

1428 prevents unnecessary wastage of photosynthates that leads to large trade-offs to

1429 yield. C – control/irrigated; S – stress/drought; L – LPB; H – HPB; W – WR; I – IR64.

1430

1431

1432

1433

1434 **Supporting information**

1435 **S1 Fig.** Diagrammatic representation of the recombination dynamics that likely  
1436 occurred in the breeding scheme that generated the two *qDTY12.1* sibling  
1437 introgression lines (LPB, HPB). The divergent phenotypes exhibited by LPB and HPB  
1438 are enigmatic considering that both carry the *qDTY12.1* introgression and both were  
1439 derived from the same parental lineages (Way Rarem, Vandana, and IR64) via  
1440 backcross coupled with marker assisted selection. LPB and HPB each underwent  
1441 separate and distinct shuffling of alleles in the genomic background, thereby creating  
1442 either a synergistic (LPB) or antagonistic (HPB) *DEC*-network.

1443

1444 **S2 Fig.** Schematic of the drought experiment conducted at IRRI in the wet season of  
1445 2017 under a rain-shelter facility. Rice plants were exposed to progressive drought by  
1446 withholding irrigation at the vegetative stage through maturity with only a single life-  
1447 saving irrigation applied after the initiation of stress. Flag leaves were collected at  
1448 the vegetative, booting, and grain-filling stages across the comparative panel to  
1449 generate the RNASeq transcriptomic data data matrix. Definition of developmental  
1450 stages were according to current standards [68].

1451

1452 **S3 Fig.** Distribution plots of Propensity scores calculated from the FPKM-based  
1453 expression values across the flag leaf RNASeq transcriptomic datasets. Propensity  
1454 score distributions of transcript abundance (FPKM) for 25,786 loci at (A) vegetative,  
1455 (B) booting, (C), and grain-fill stages under control/irrigated conditions, and (D)  
1456 vegetative, (E) booting, and (F) grain-filling stages under stress/drought conditions.

1457 **S4 Fig.** Phylogenetic analysis of *OsDEC* (Os12g0465700). Homology of the rice  
1458 *DECUSSATE* gene to *Arabidopsis thaliana* At3G03460 and At5G17510 orthologs  
1459 was referenced in the published report [33], and re-validated by using the  
1460 phylogenetic tree function at EnsemblPlants (<https://plants.ensembl.org/index.html>).

1461

1462 **S5 Fig.** Comparison of reproductive milestones of the *Arabidopsis thaliana* *AtDEC* T-  
1463 DNA insertion mutants At3g03460 (3Gm), At5G17510 (5Gm) and Columbia wild-type  
1464 (Col-0) under control and drought conditions. (A) Days to bolting; (B) Days to first  
1465 bloom; (C) Days to seed set. Box plots are means of individual plants (n = 16).  
1466 Means were separated with Tukey HSD after significant ANOVA. \*\*significant  
1467 difference at at p<0.01; \*\*\*significant difference at p<0.001; n.s. – no significant  
1468 difference at p<0.05.

1469

1470 **S6 Fig.** Expression of *OsDST* (Os03g0786400; Drought and Salt Tolerance) during  
1471 (A) Vegetative, (B) Booting, (C) Grain-filling stages. *OsDST* directly regulates  
1472 cytokinin degradation via *OsCKX2*, which is a single copy gene in the rice genome.  
1473 During the critical stage of booting, *OsDST* was downregulated LPB and IR64 with -  
1474 2.24 and -5.86 log<sub>2</sub> fold-change, respectively. *OsDST* was upregulated in HPB and  
1475 WR at 0.74 and 0.62 log<sub>2</sub> fold-change, respectively.

1476

1477 **S7 Fig.** Expression of *OsZEP* (Os04g0448900; zeaxanthin epoxidase) during (A)  
1478 Vegetative, (B) Booting, and (C) Grain-filling stages. Involved in the first committed  
1479 step of ABA biosynthesis, *OsZEP* activity directly impacts the ABA response,



1480 especially under abiotic stress. At booting stage, LPB and WR exhibited decreases  
1481 in *OsZEP* expression with -0.57 and -3.0 log<sub>2</sub> fold-change, respectively. In contrast,  
1482 HPB and WR exhibited increases with 4.1 and 1.9 log<sub>2</sub> fold-change, respectively.

1483

1484 **S1 Table.** List of qDTYs that are known to contribute to yield retention under  
1485 reproductive-stage drought.

1486

1487 **S2 Table.** Key terms used to extract stress-related genes from the global  
1488 transcriptomic window of 25,786 loci.

1489

1490 **S3 Table.** List of annotated protein-coding gene loci (n = 50) within the *qDTY12.1*  
1491 boundaries.

1492

1493 **S4 Table.** List of the genes that comprised the full DEC-network (n = 36) that is  
1494 operative during the onset of booting under drought.

1495

1496 **S5 Table.** Biological functions and traits that were associated to *DEC*-network by the  
1497 KnetMiner knowledge integration platform.

1498

1499 **S6 Table.** DNA primers and methods used for genomic-PCR (genotyping) and qRT-  
1500 PCR analyses of *Arabidopsis AtDEC* T-DNA insertion mutants.

1501

1502

**Table 1. List of genes included in the main hub of the *DEC-network* and used as baits for extracting the components of the full *DEC-network* at booting stage.**

| Locus ID                   | *Oryzabase Gene Symbol | †RAP-DB Description                                                                                                                                                                    |
|----------------------------|------------------------|----------------------------------------------------------------------------------------------------------------------------------------------------------------------------------------|
| <b><i>Os02g0555300</i></b> | <i>OsNAC28</i>         | No apical meristem (NAM) protein domain containing protein.                                                                                                                            |
| <b><i>Os02g0830200</i></b> | <i>OsRR3</i>           | A-type response regulator, Cytokinin signaling                                                                                                                                         |
| <b><i>Os03g0109300</i></b> | <i>LOGL3</i>           | Similar to Lysine decarboxylase-like protein                                                                                                                                           |
| <b><i>Os03g0752800</i></b> | <i>OsMADS14</i>        | Similar to Isoform 2 of MADS-box transcription factor 14. APETALA1 (AP1)/ FRUITFULL (FUL)-like MADS box transcription factor, Specification of inflorescence meristem identity         |
| <b><i>Os03g0810100</i></b> | <i>OsIPT4</i>          | Similar to tRNA isopentenyl transferase-like protein (Adenylate isopentenyltransferase)                                                                                                |
| <b><i>Os05g0521300</i></b> | <i>OsPHP3</i>          | Similar to Histidine-containing phosphotransfer protein 4                                                                                                                              |
| <b><i>Os07g0108900</i></b> | <i>OsMADS15</i>        | Similar to MADS-box transcription factor 15. APETALA1 (AP1)/ FRUITFULL (FUL)-like MADS box transcription factor, Specification of inflorescence meristem identity, sexual reproduction |
| <b><i>Os07g0568700</i></b> | <i>OsFOR1</i>          | Polygalacturonase-inhibiting protein, Inhibitor of fungal polygalacturonase, Regulation of floral organ number                                                                         |
| <b><i>Os08g0115800</i></b> | <i>ONAC29</i>          | NAC transcription factor, Regulation of cellulose synthesis                                                                                                                            |
| <b><i>Os10g0479500</i></b> | <i>LOGL10</i>          | Similar to carboxy-lyase                                                                                                                                                               |
| <b><i>Os12g0465700</i></b> | <i>DEC</i>             | Plant-specific protein containing a glutamine-rich region and a conserved motif, Controls of phyllotaxy by affecting cytokinin signaling                                               |

†RAP-DB – The Rice Annotation Project Database (<https://rapdb.dna.affrc.go.jp/index.html>)

\*Oryzabase – Integrated Rice Science Database (<https://shigen.nig.ac.jp/rice/oryzabase/>)

1503

1504

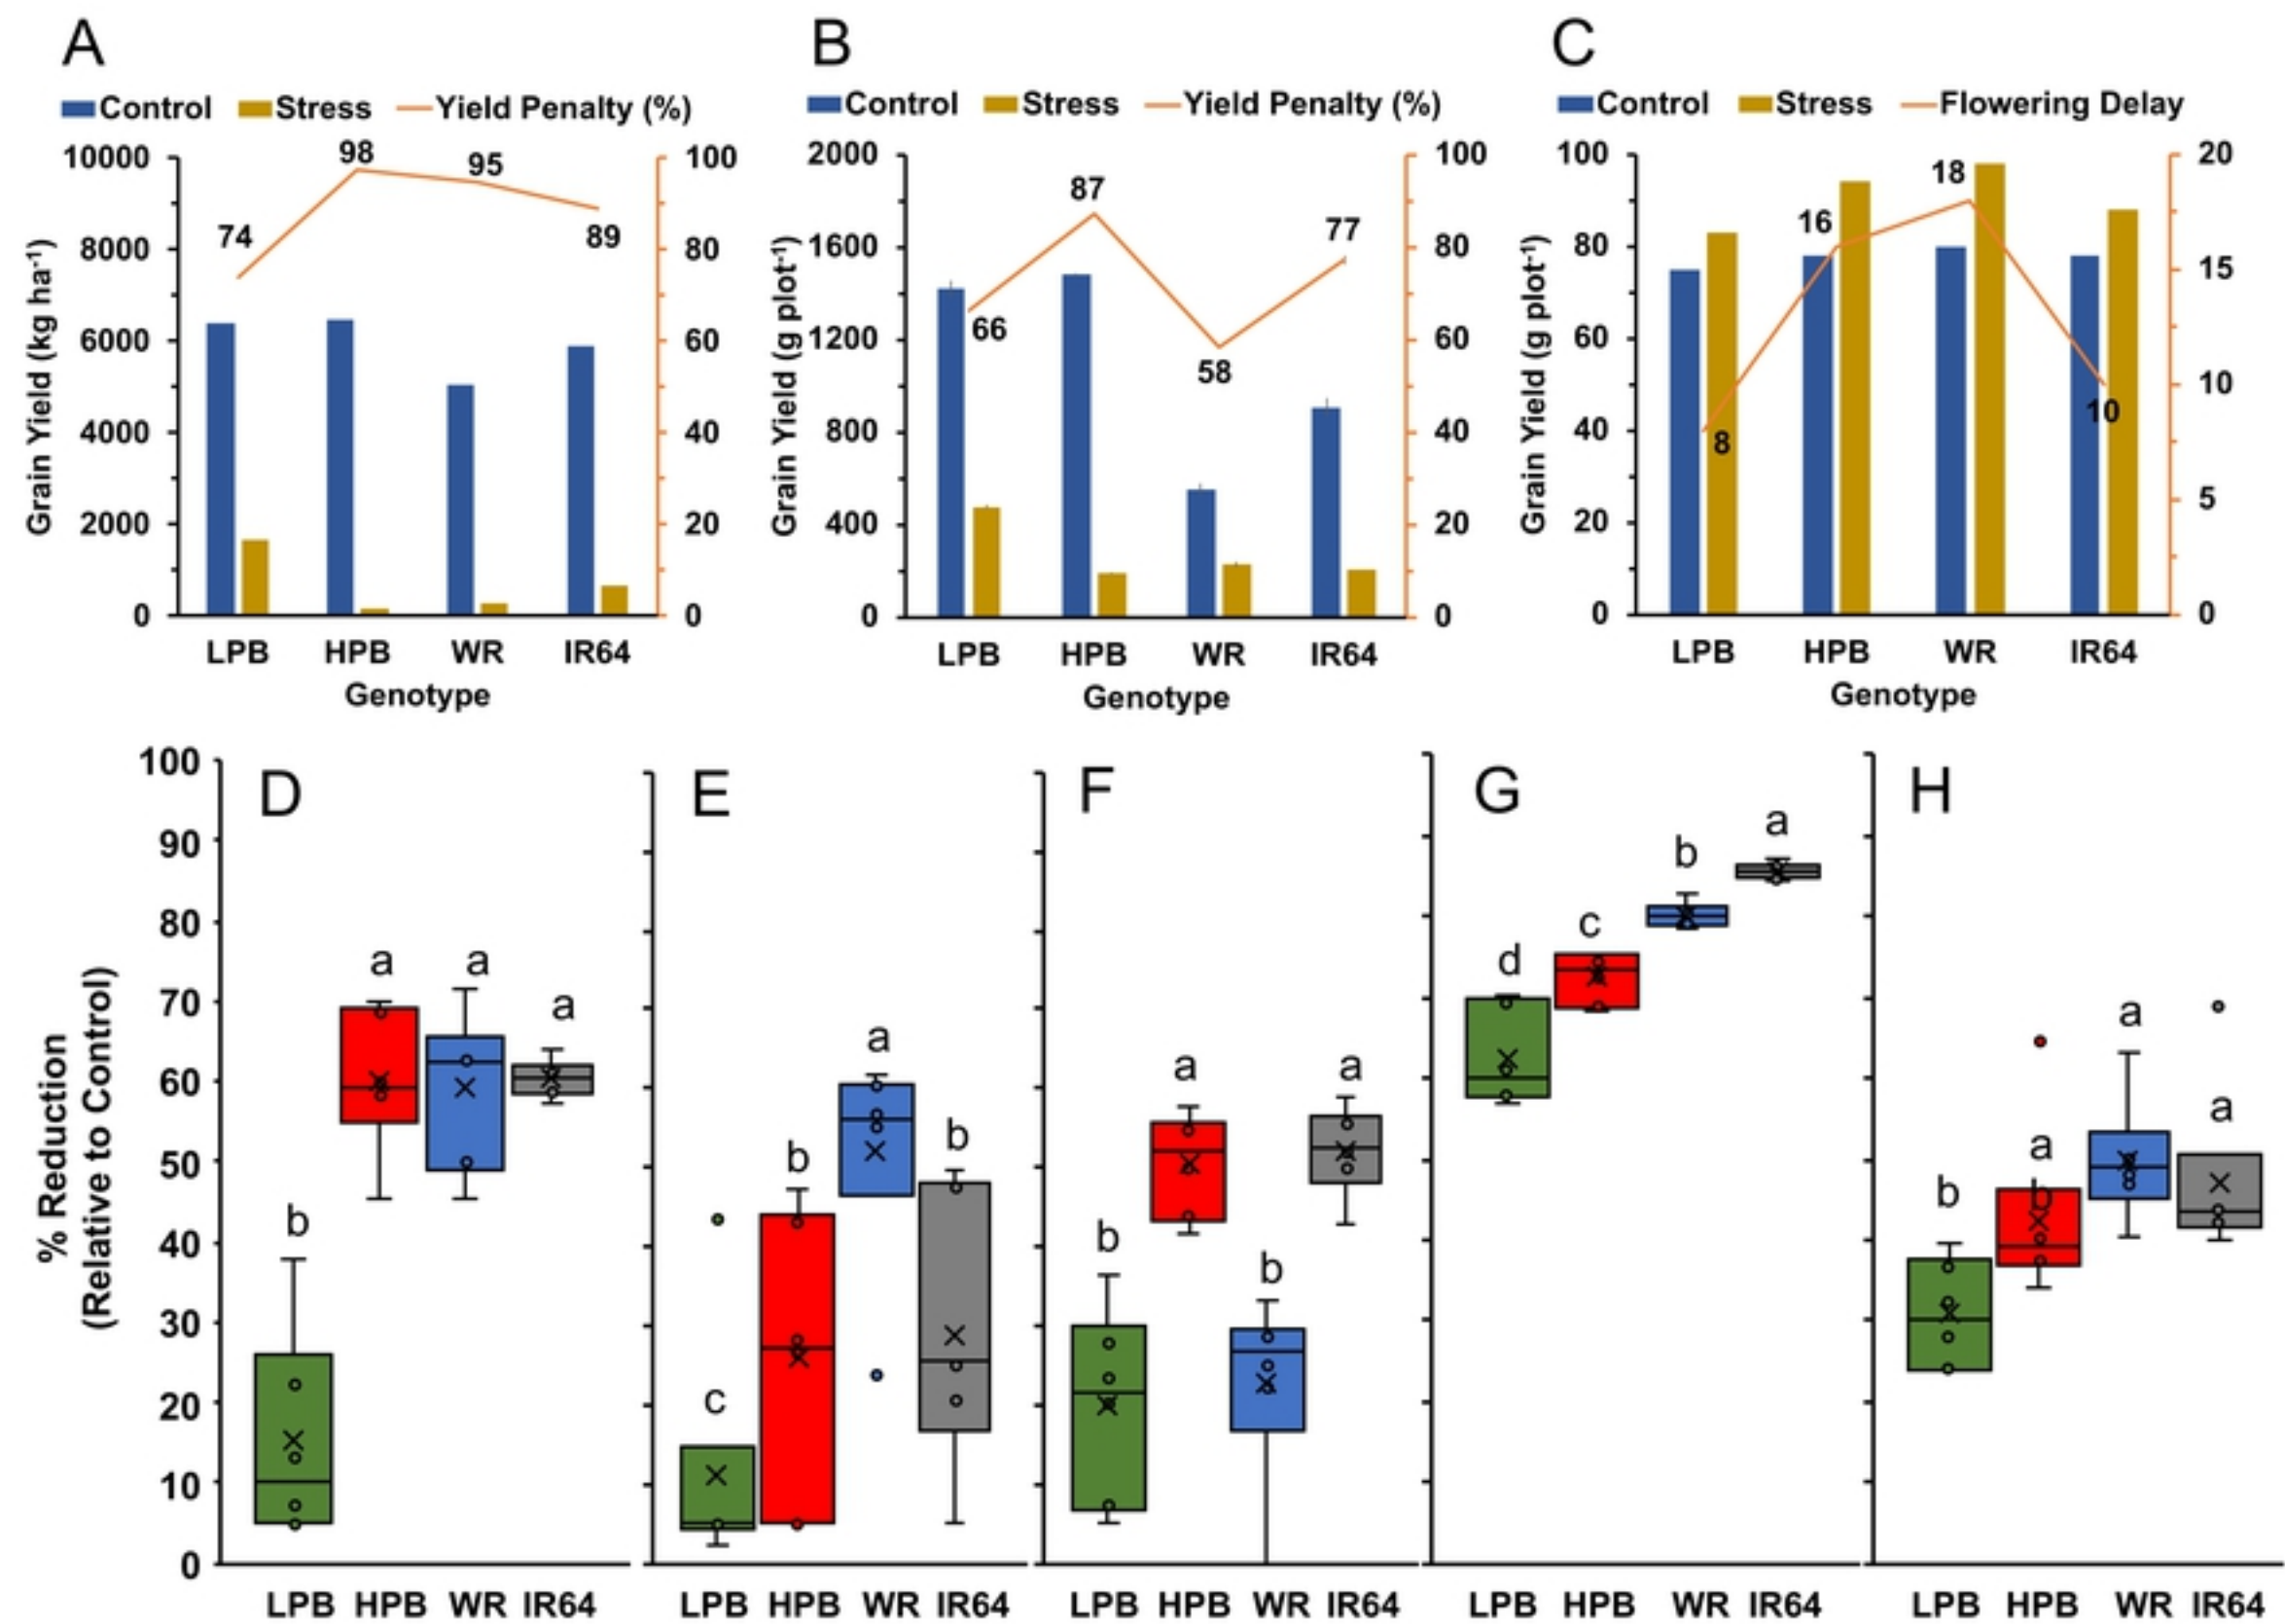

Fig1

## Global

## Transcription Factors

## Stress-Related

**A**

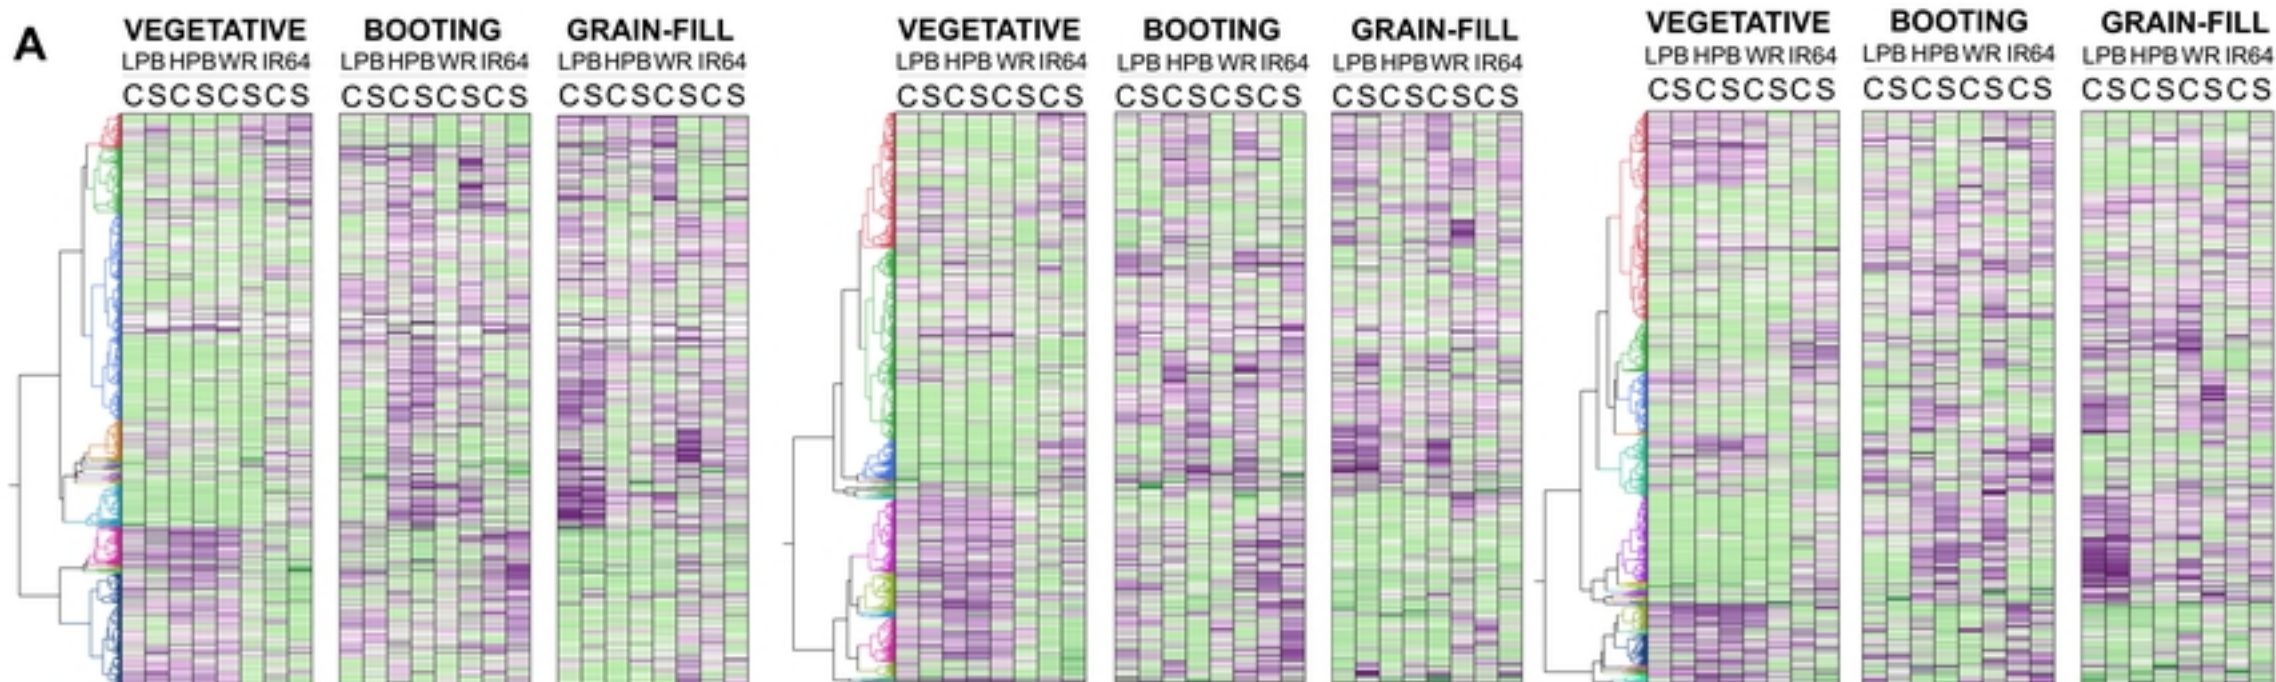

**B**

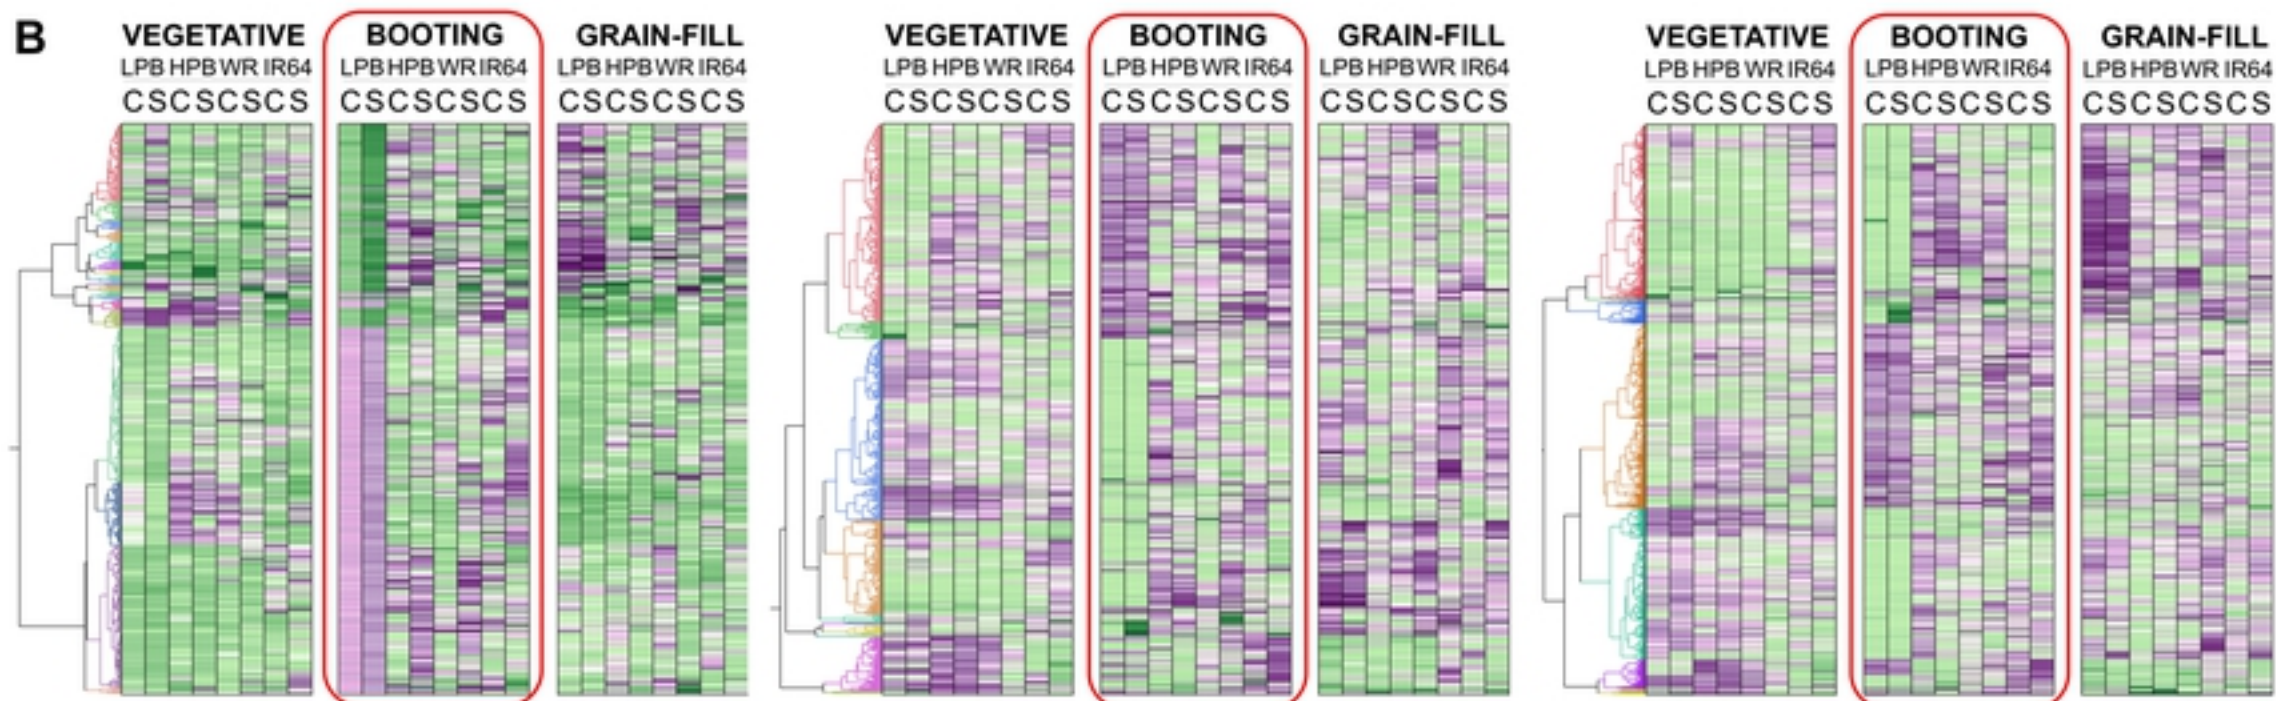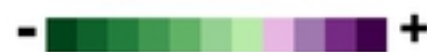

Propensity

Fig2

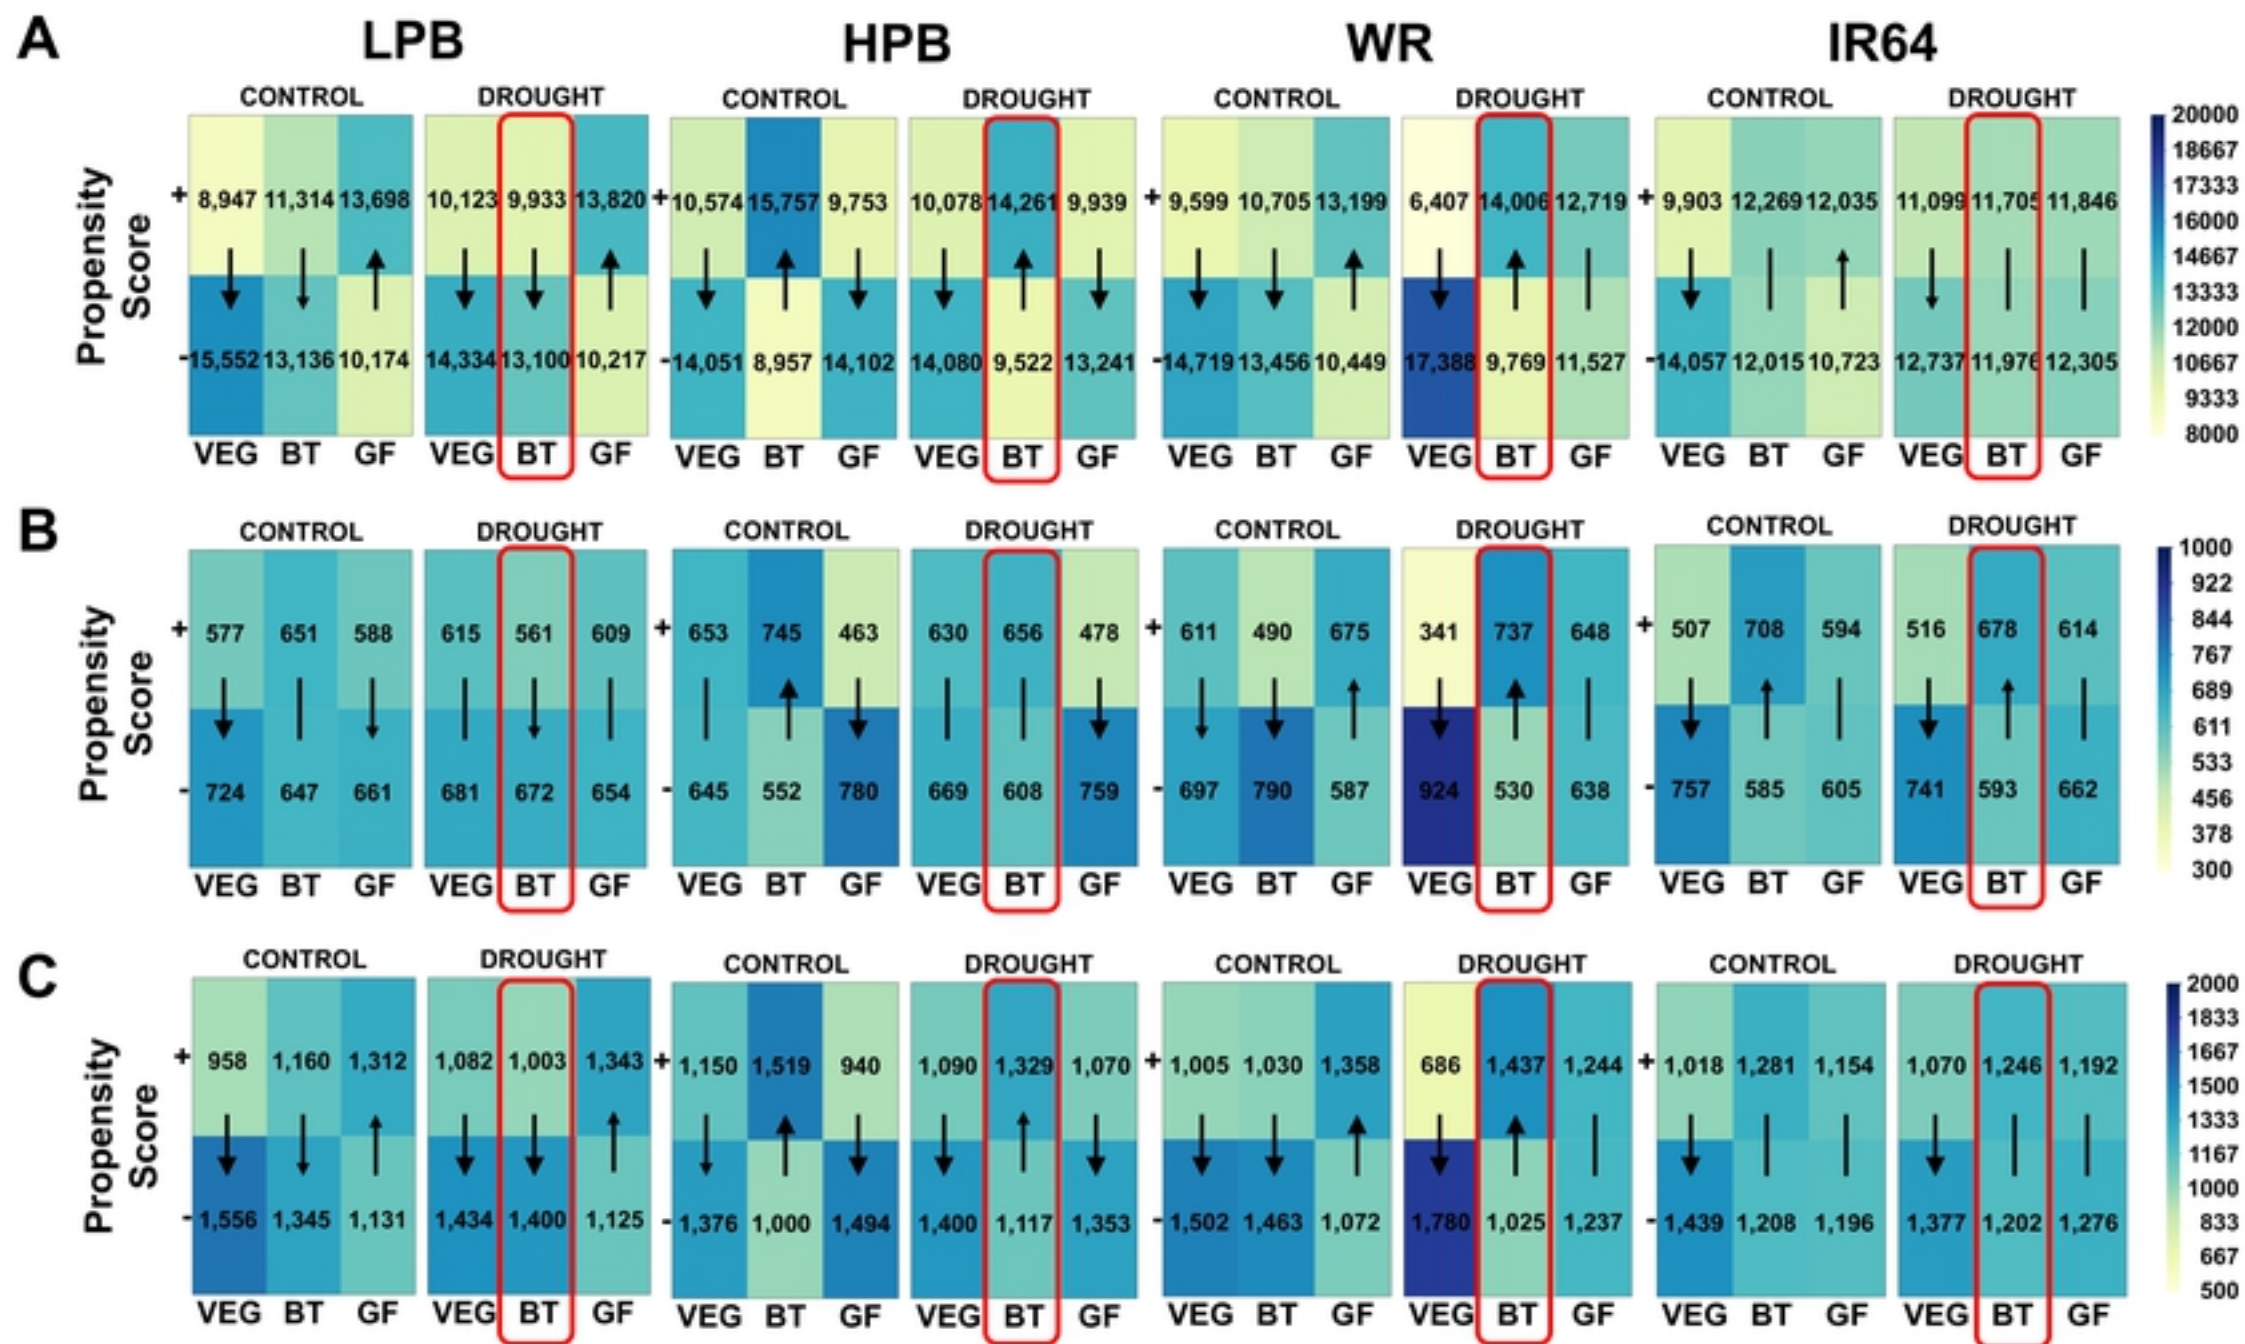

Fig3

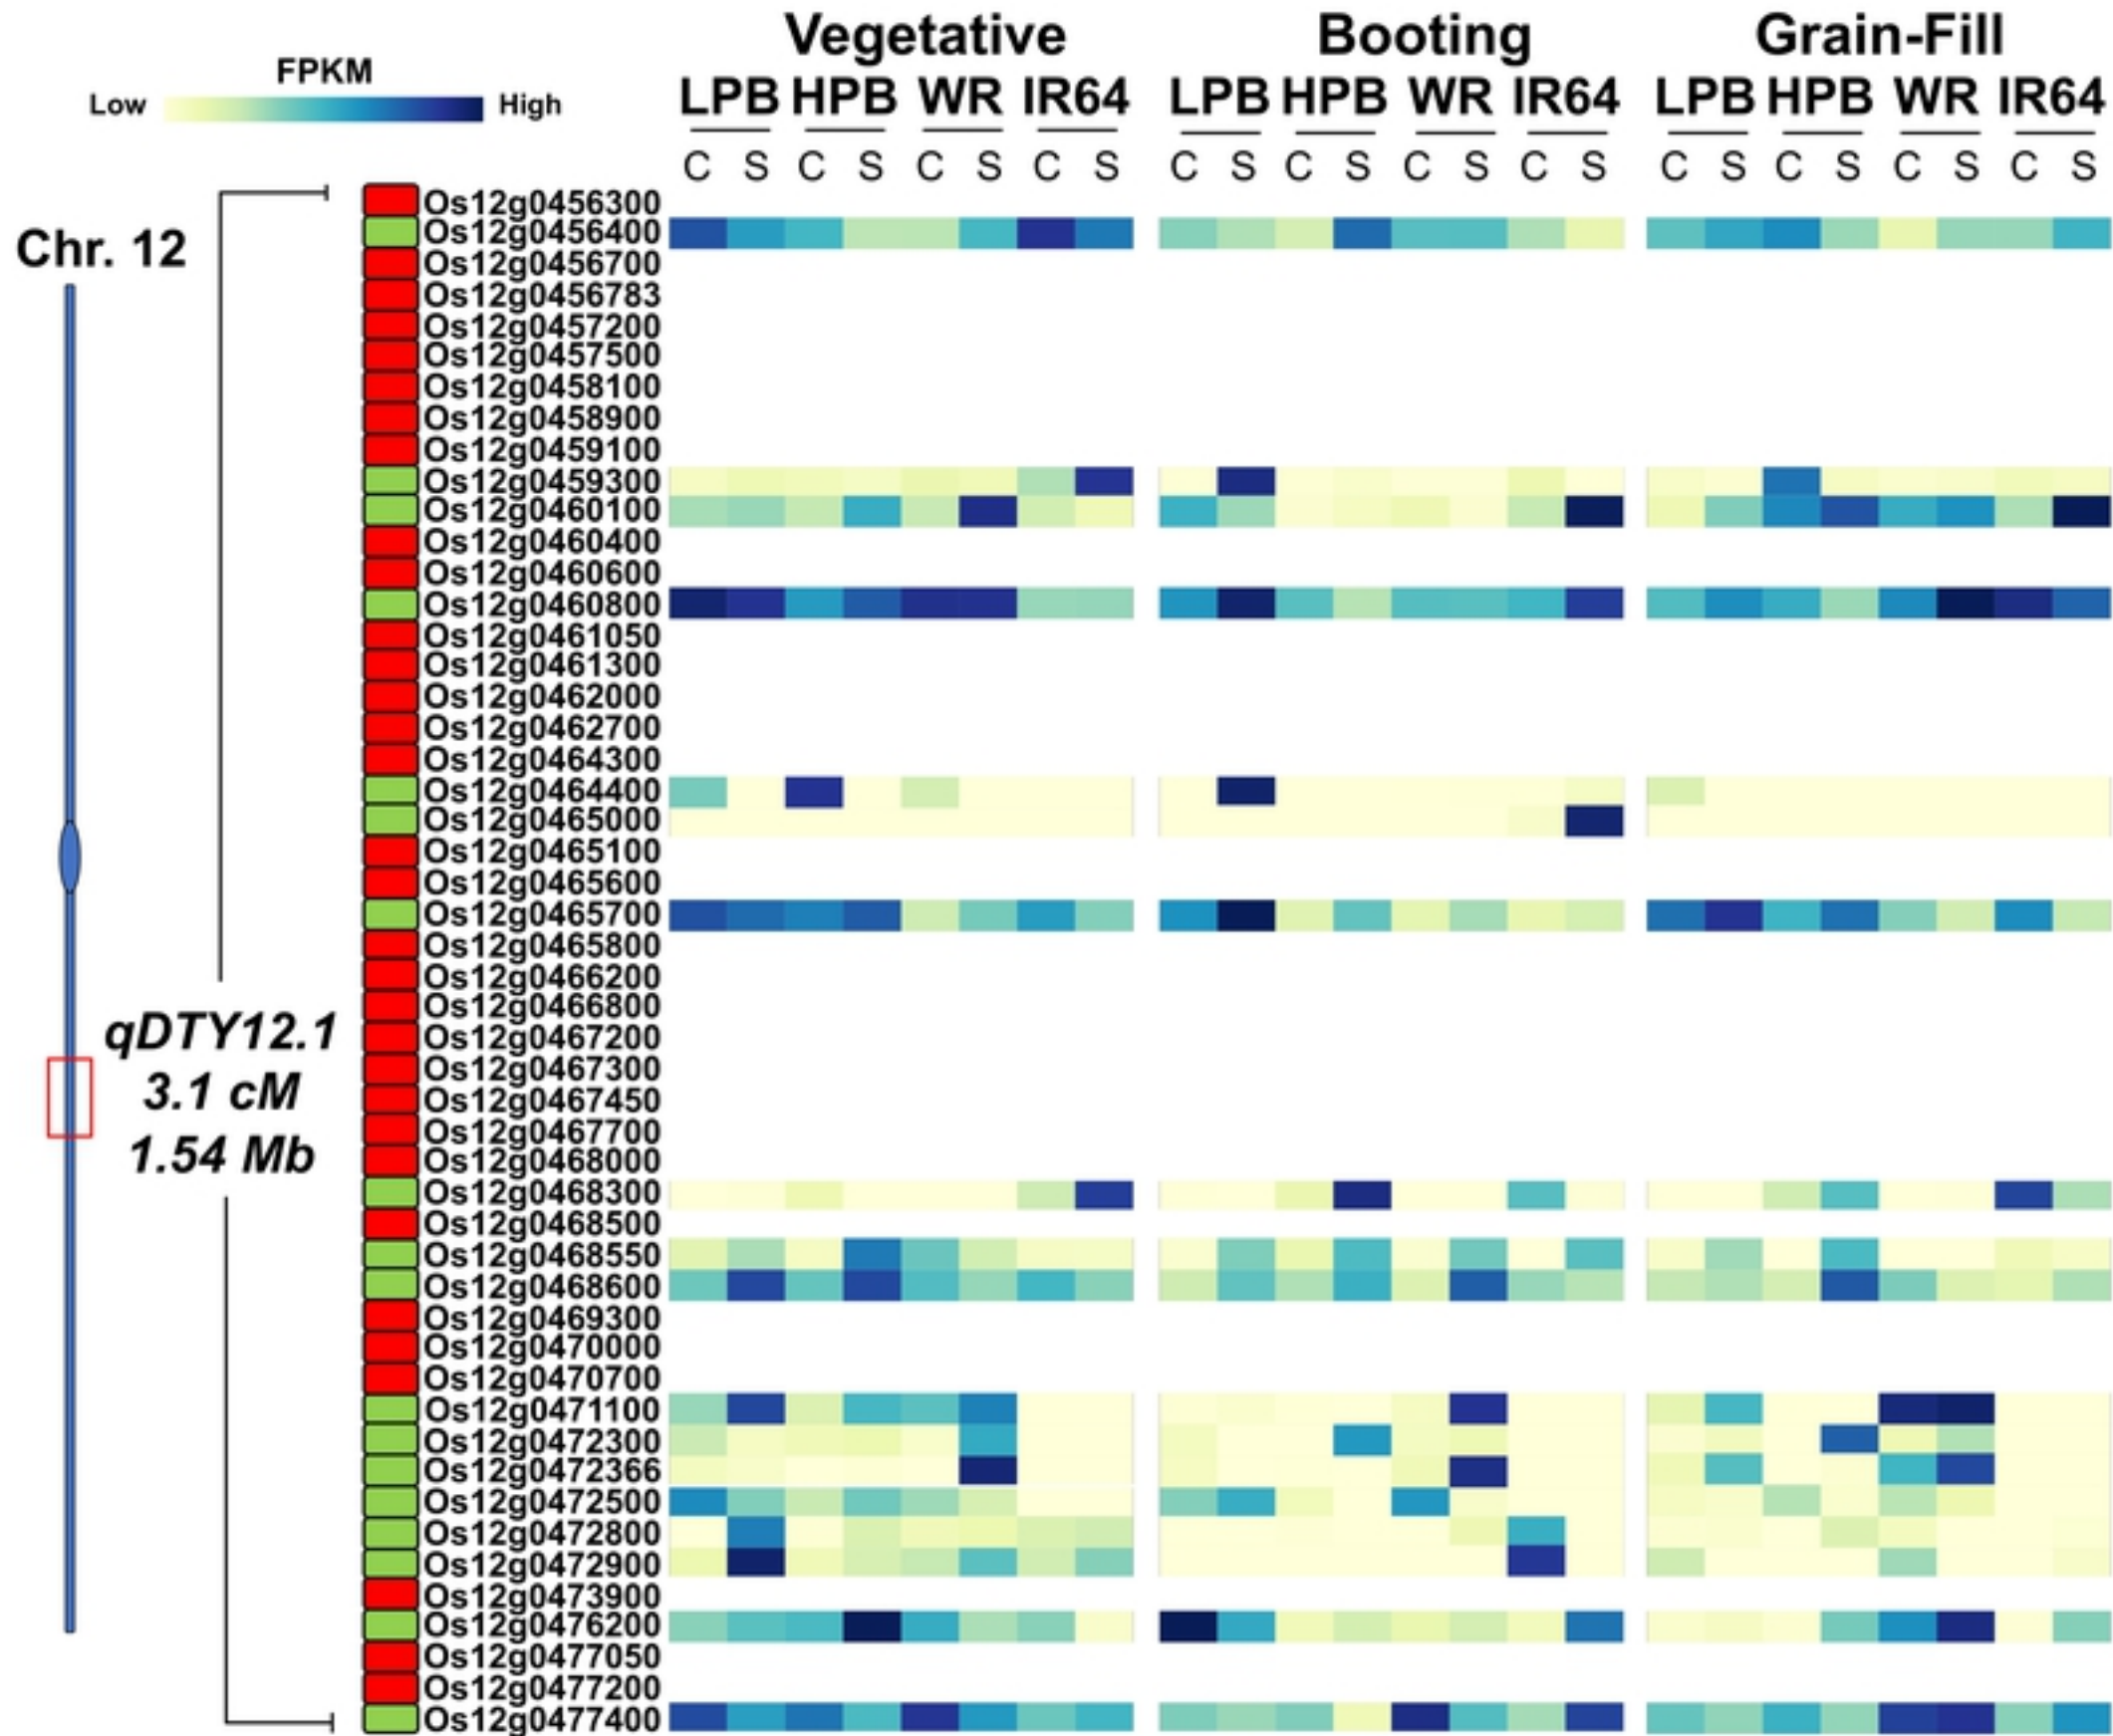

Fig4

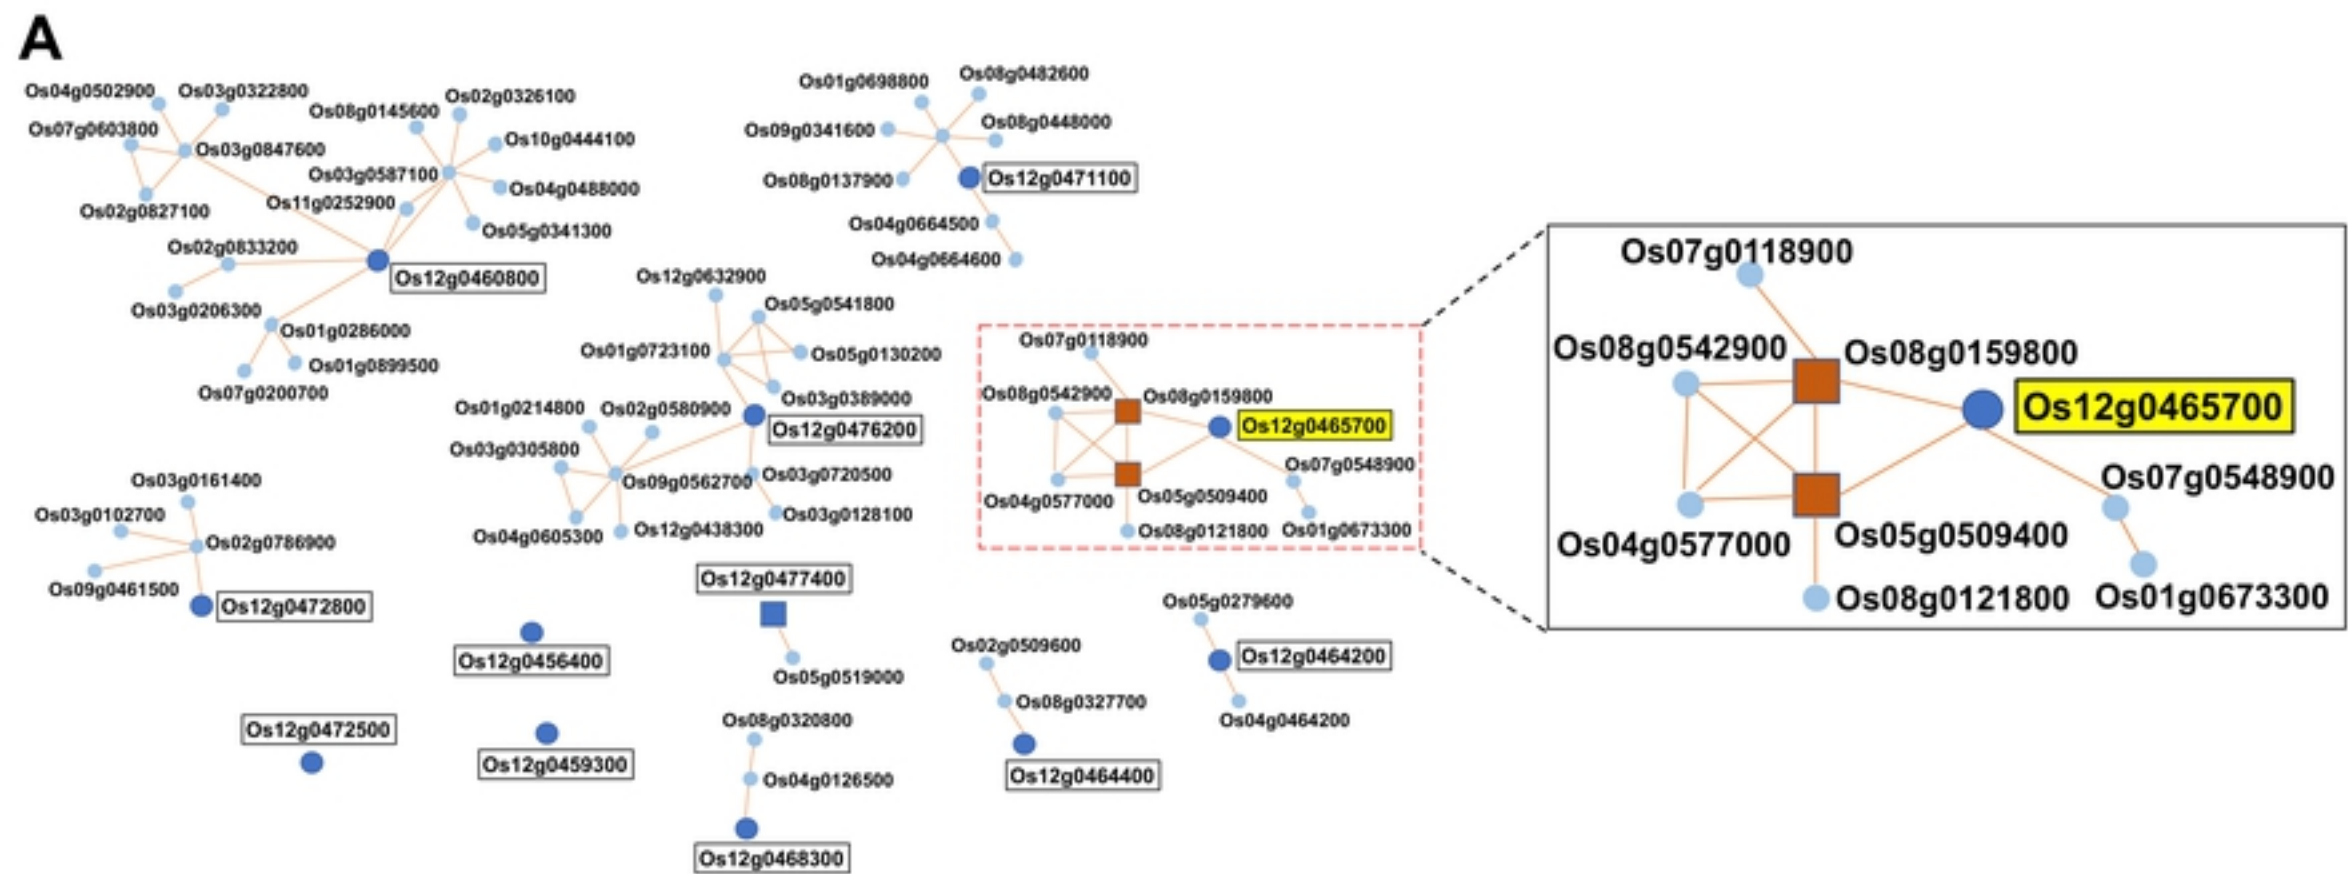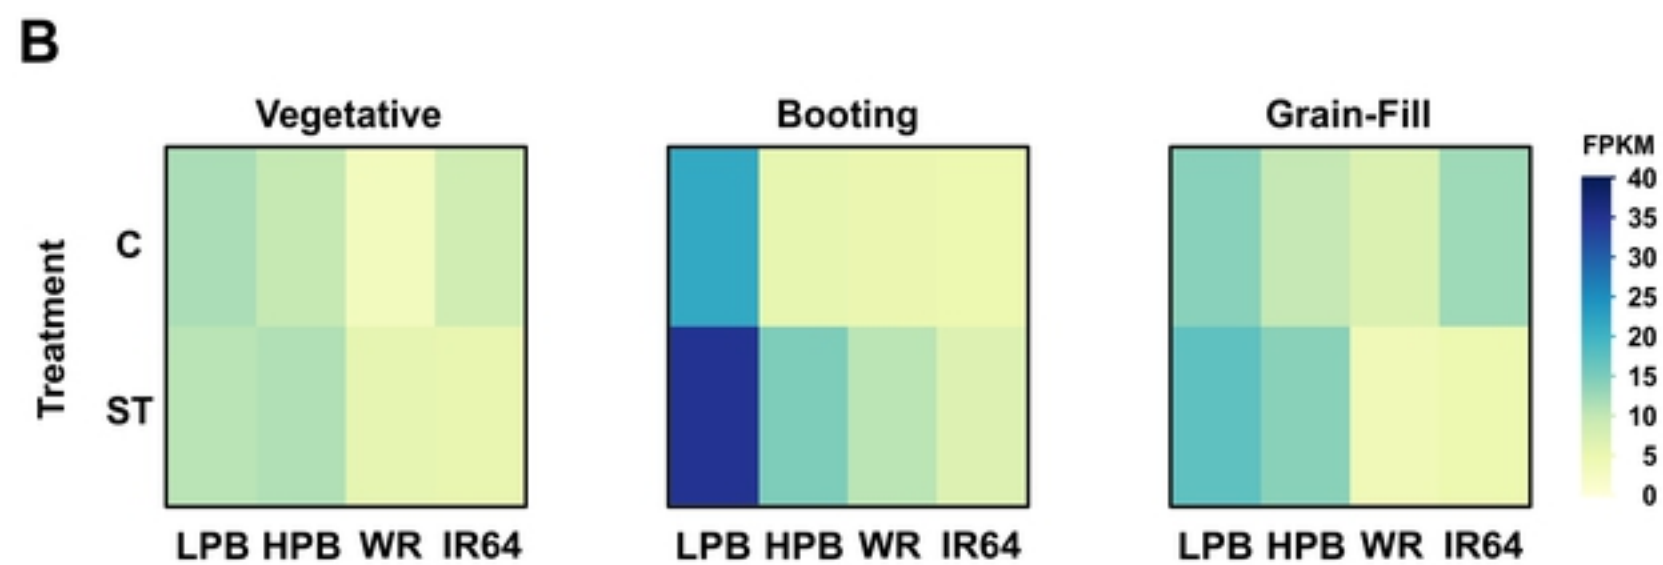

Fig5

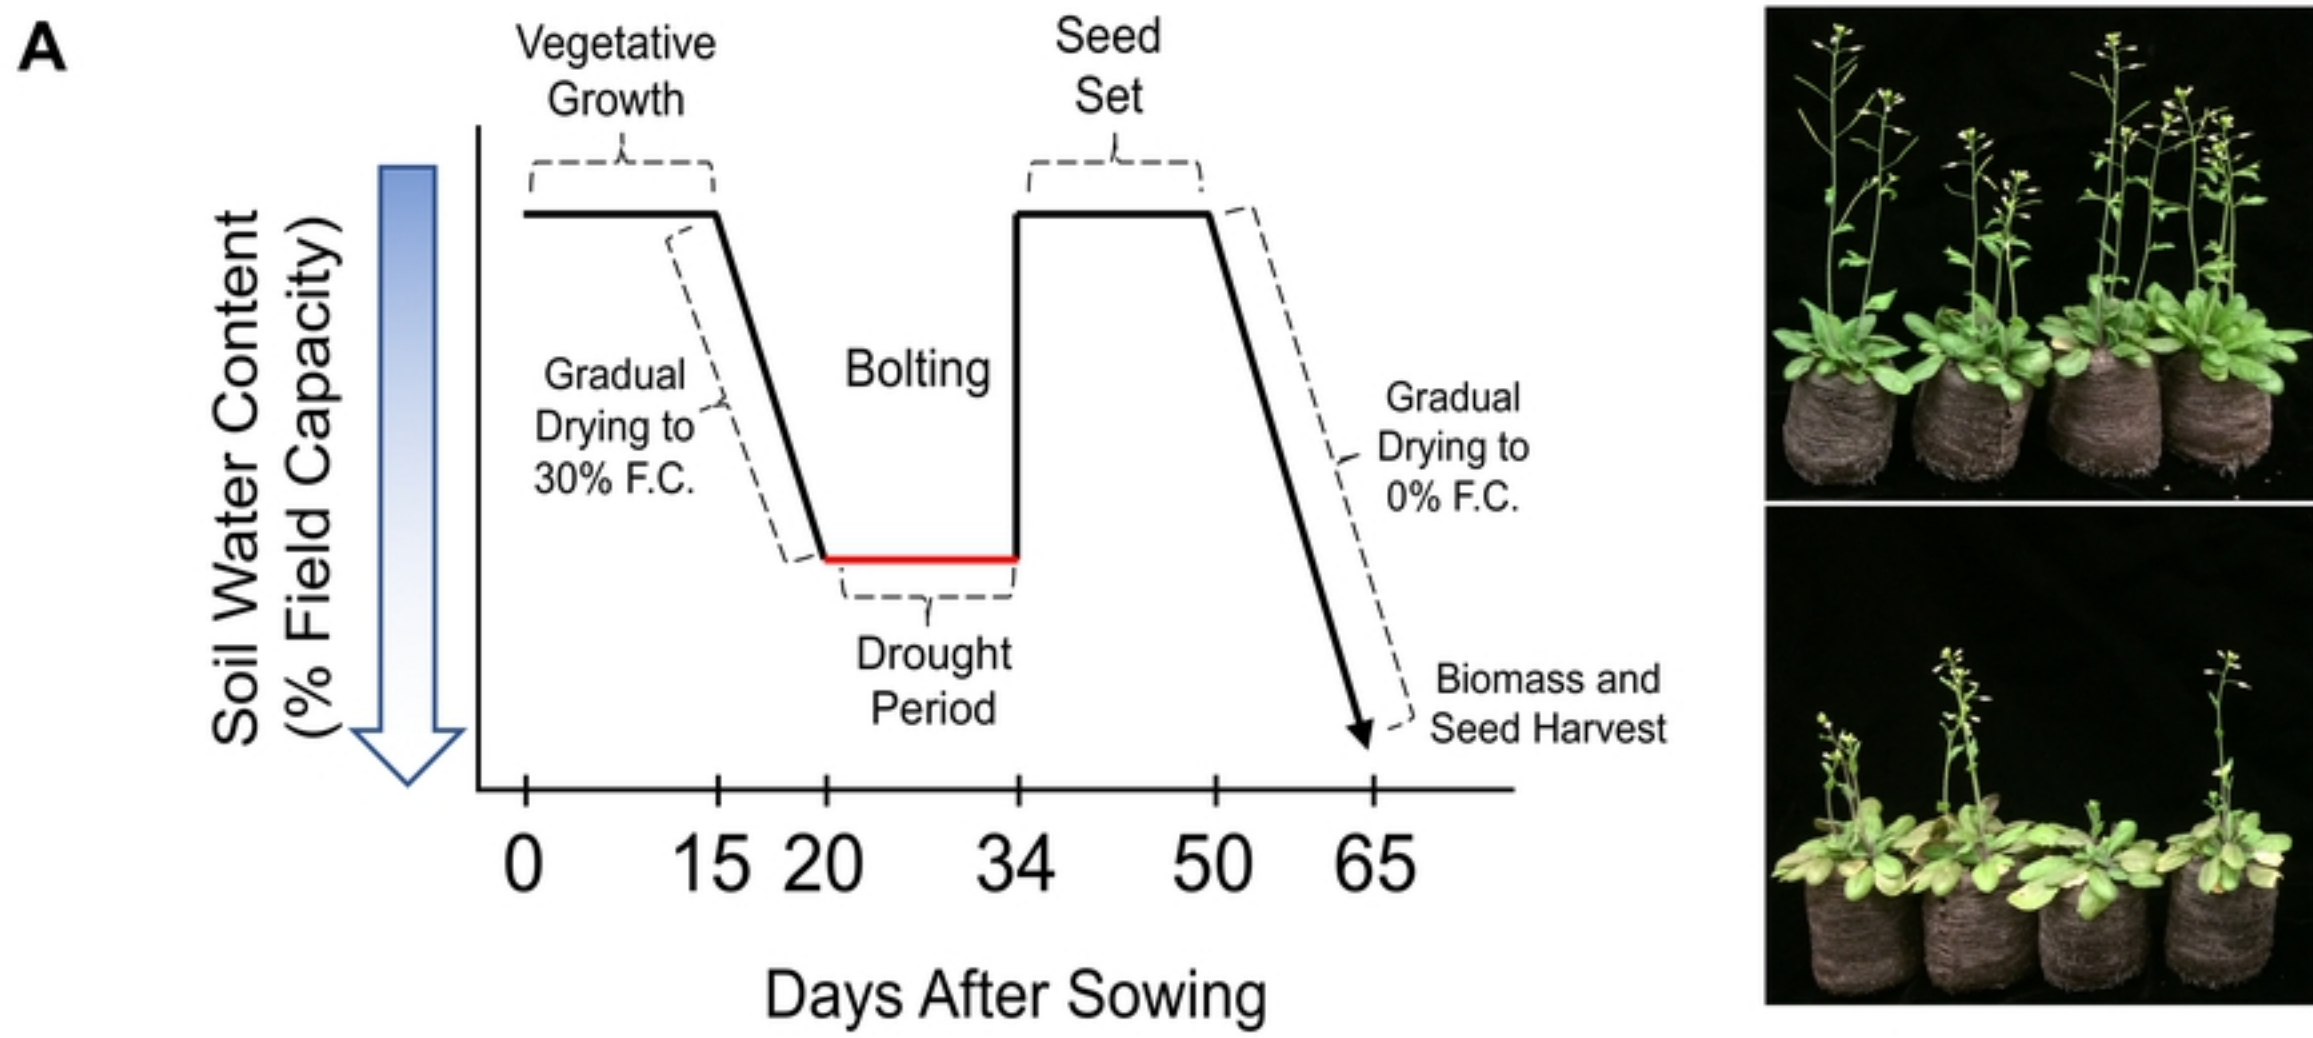

**B**

bioRxiv preprint doi: <https://doi.org/10.1101/2021.02.09.430414>; this version posted February 9, 2021. The copyright holder for this preprint (which was not certified by peer review) is the author/funder. This article is a US Government work. It is not subject to copyright under 17 USC 105 and is also made available for use under a CC0 license.

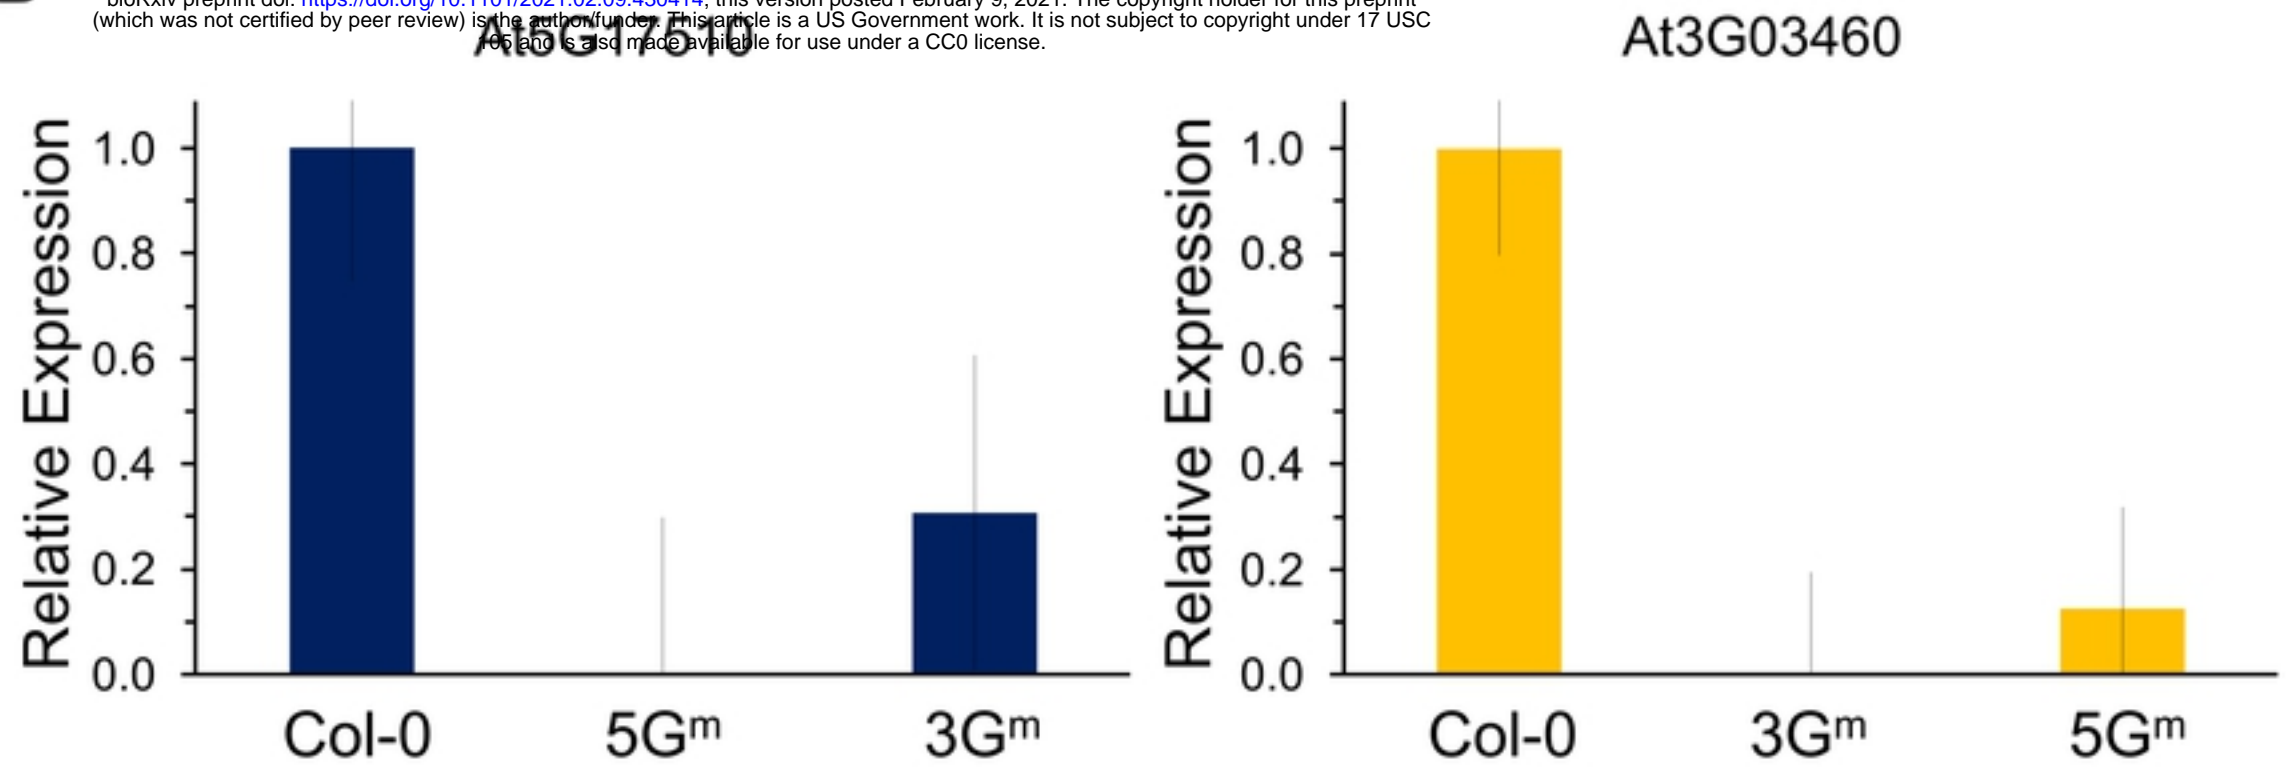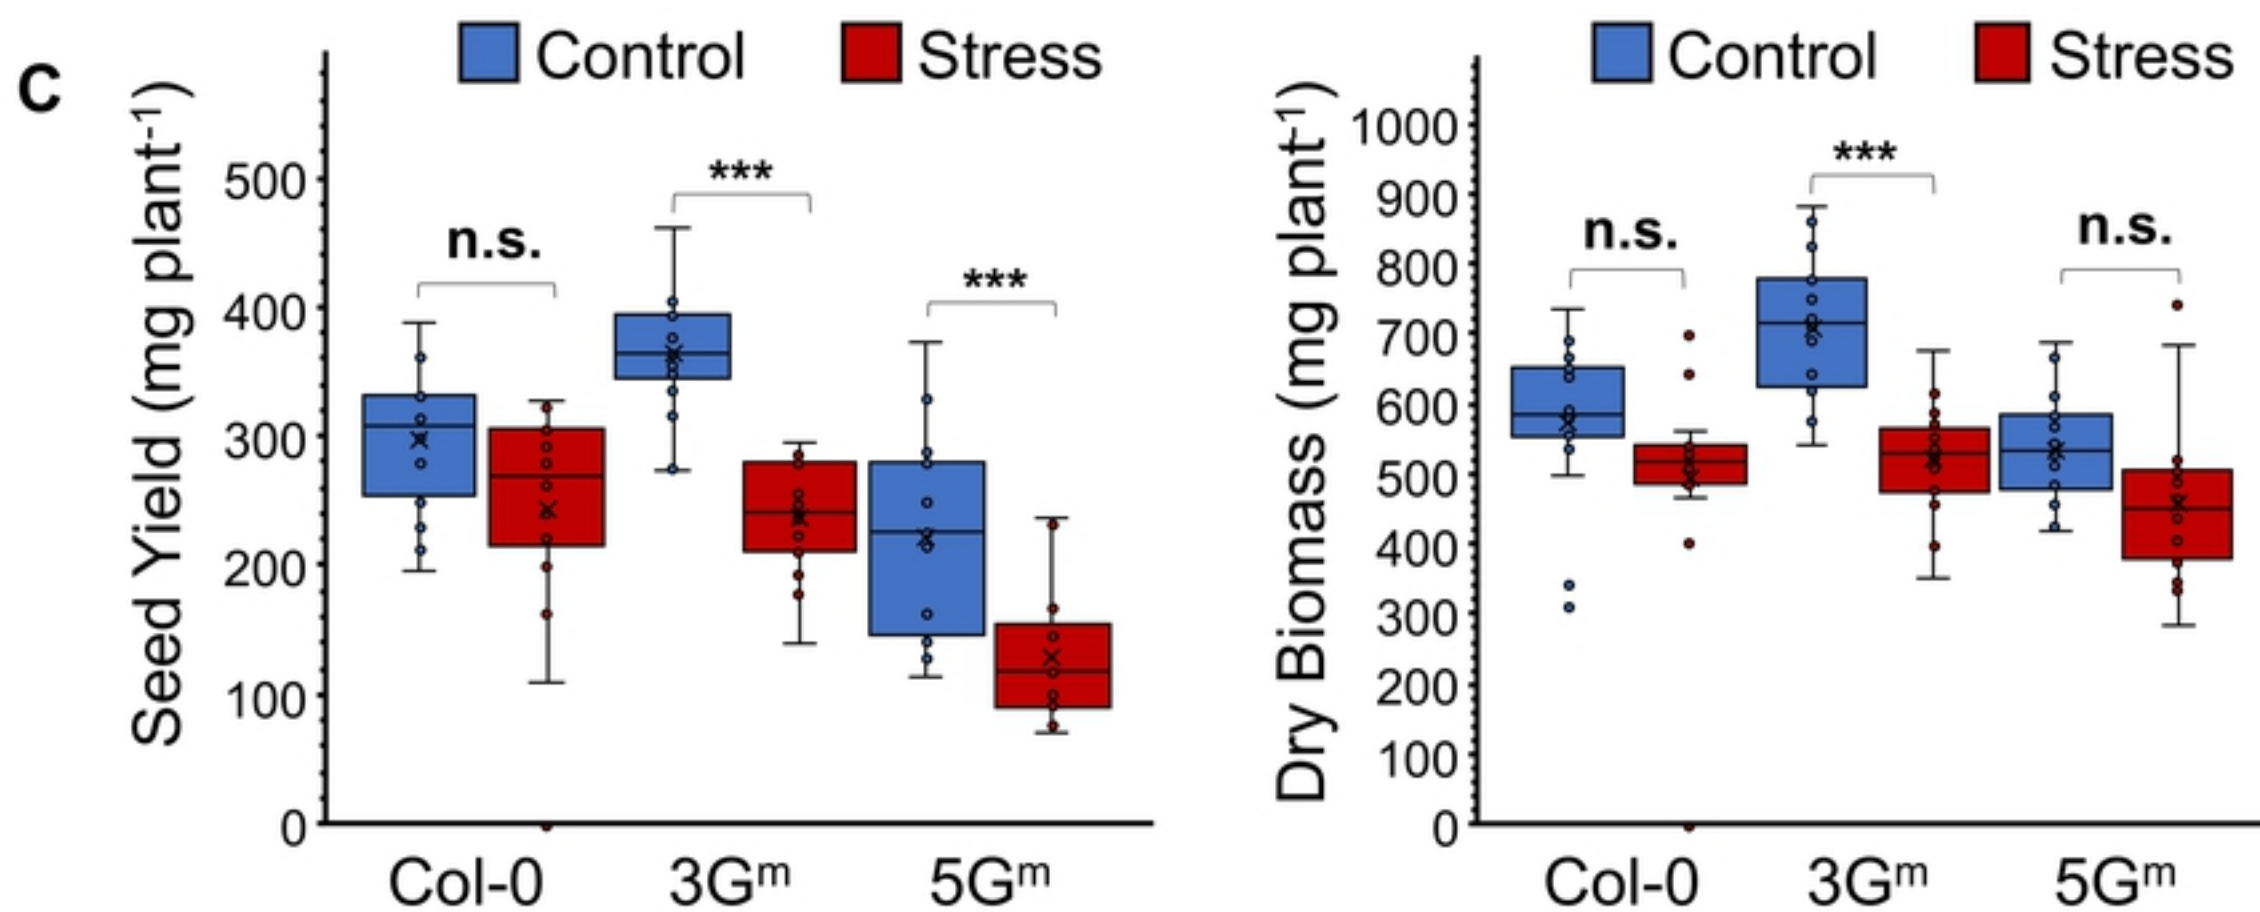

Fig6



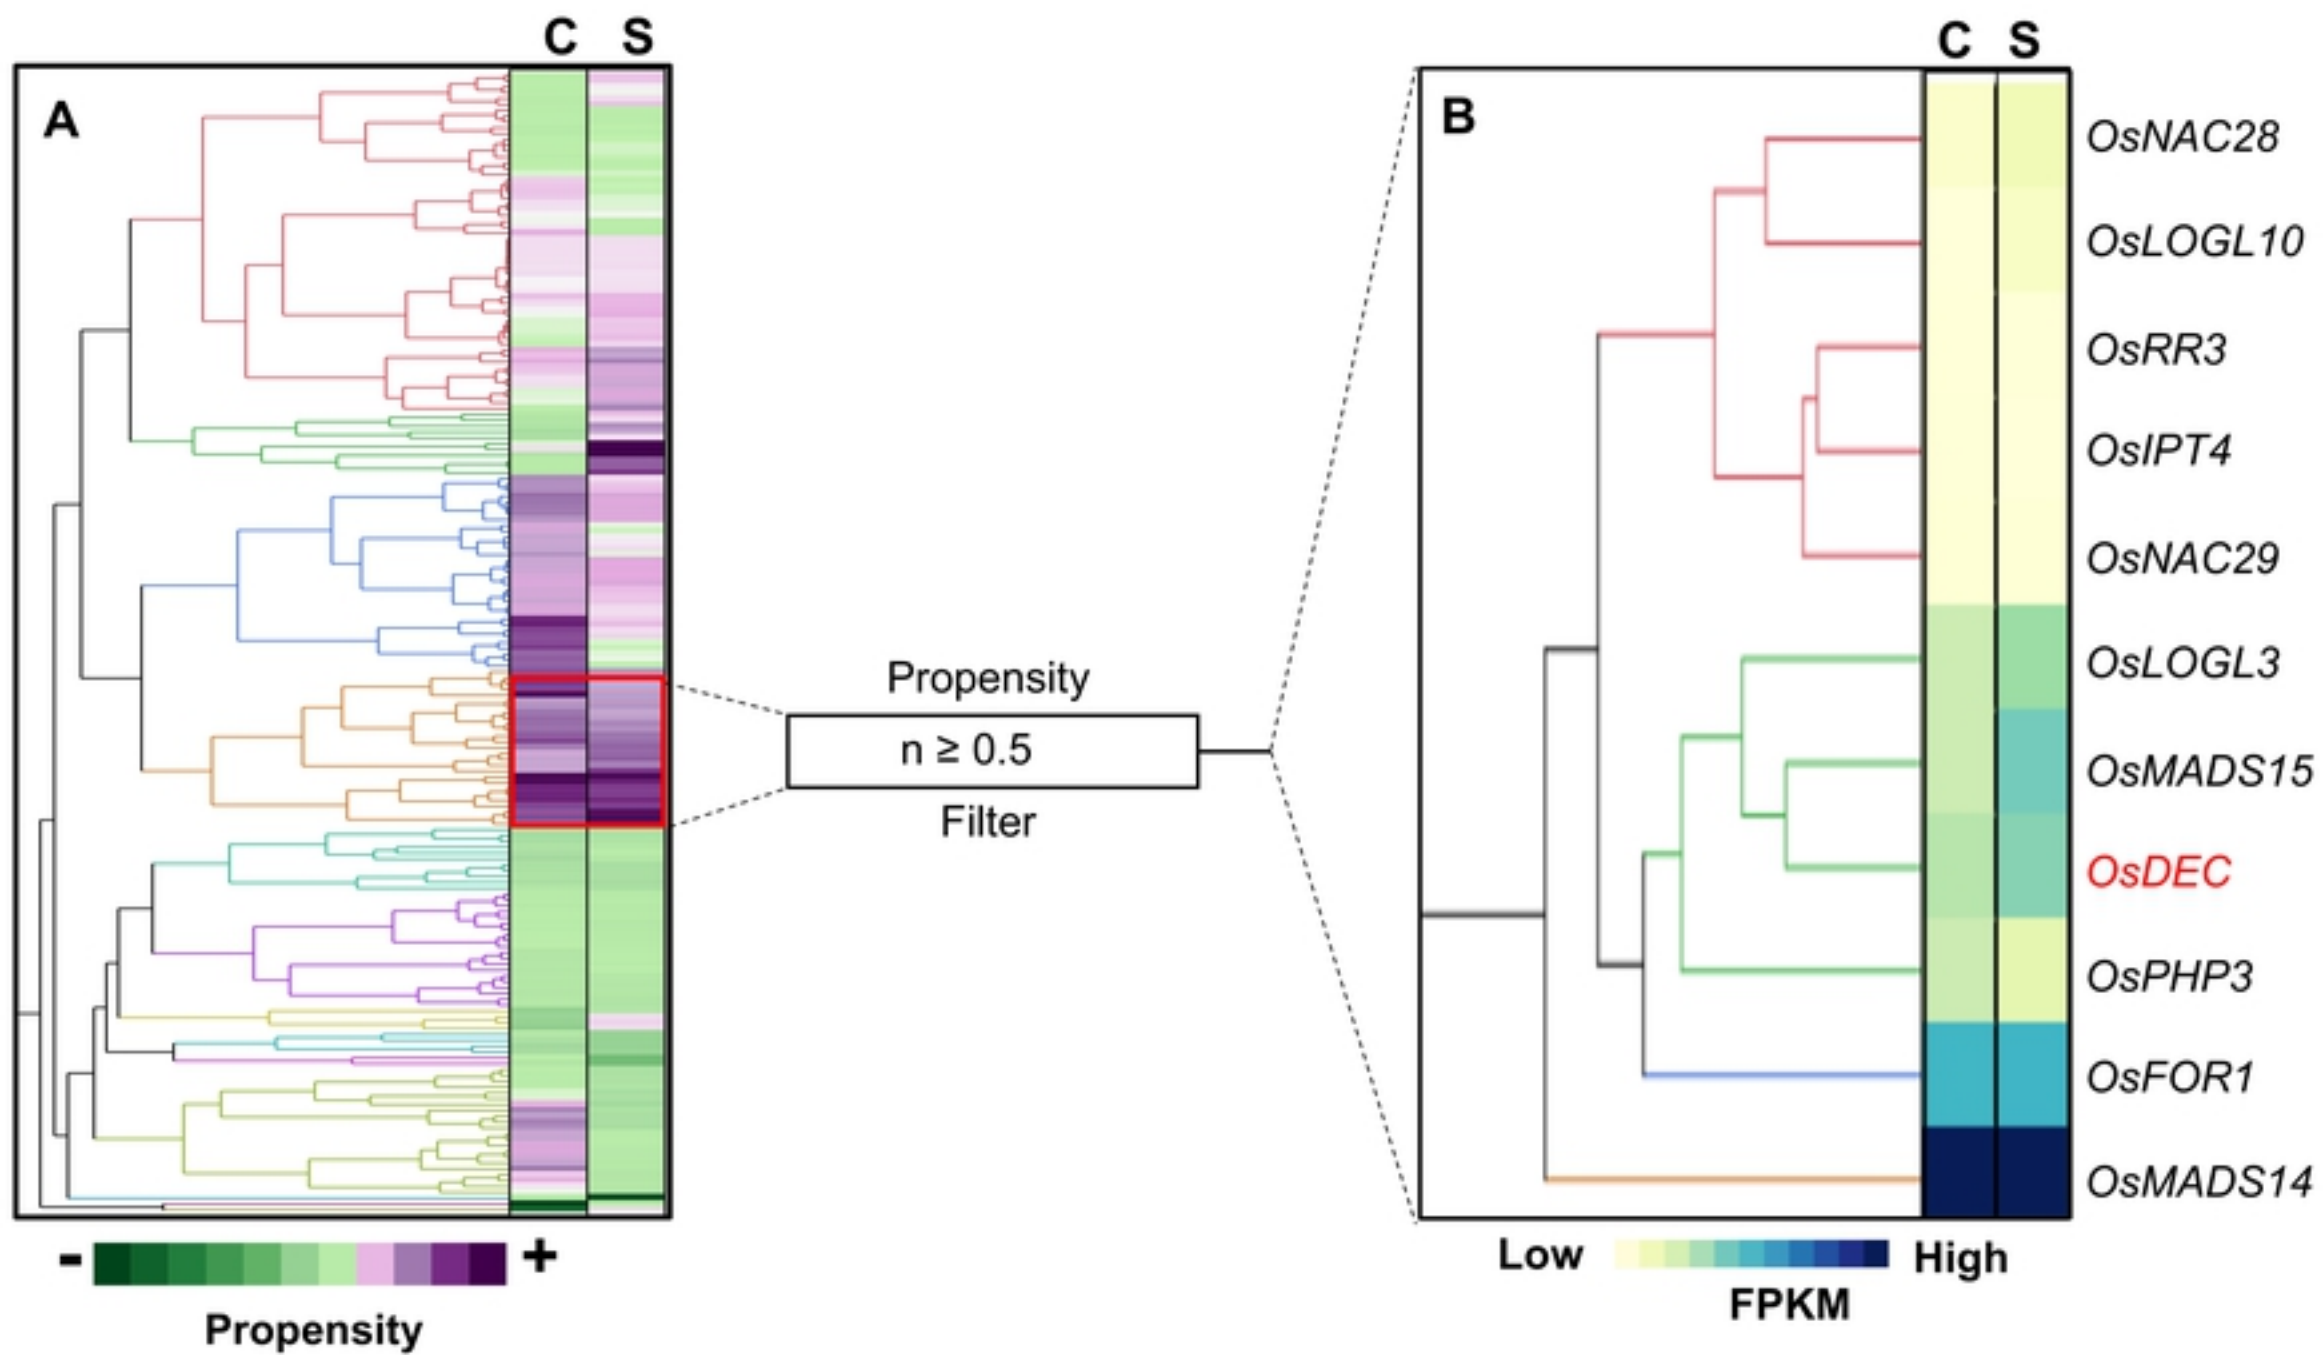

Fig7

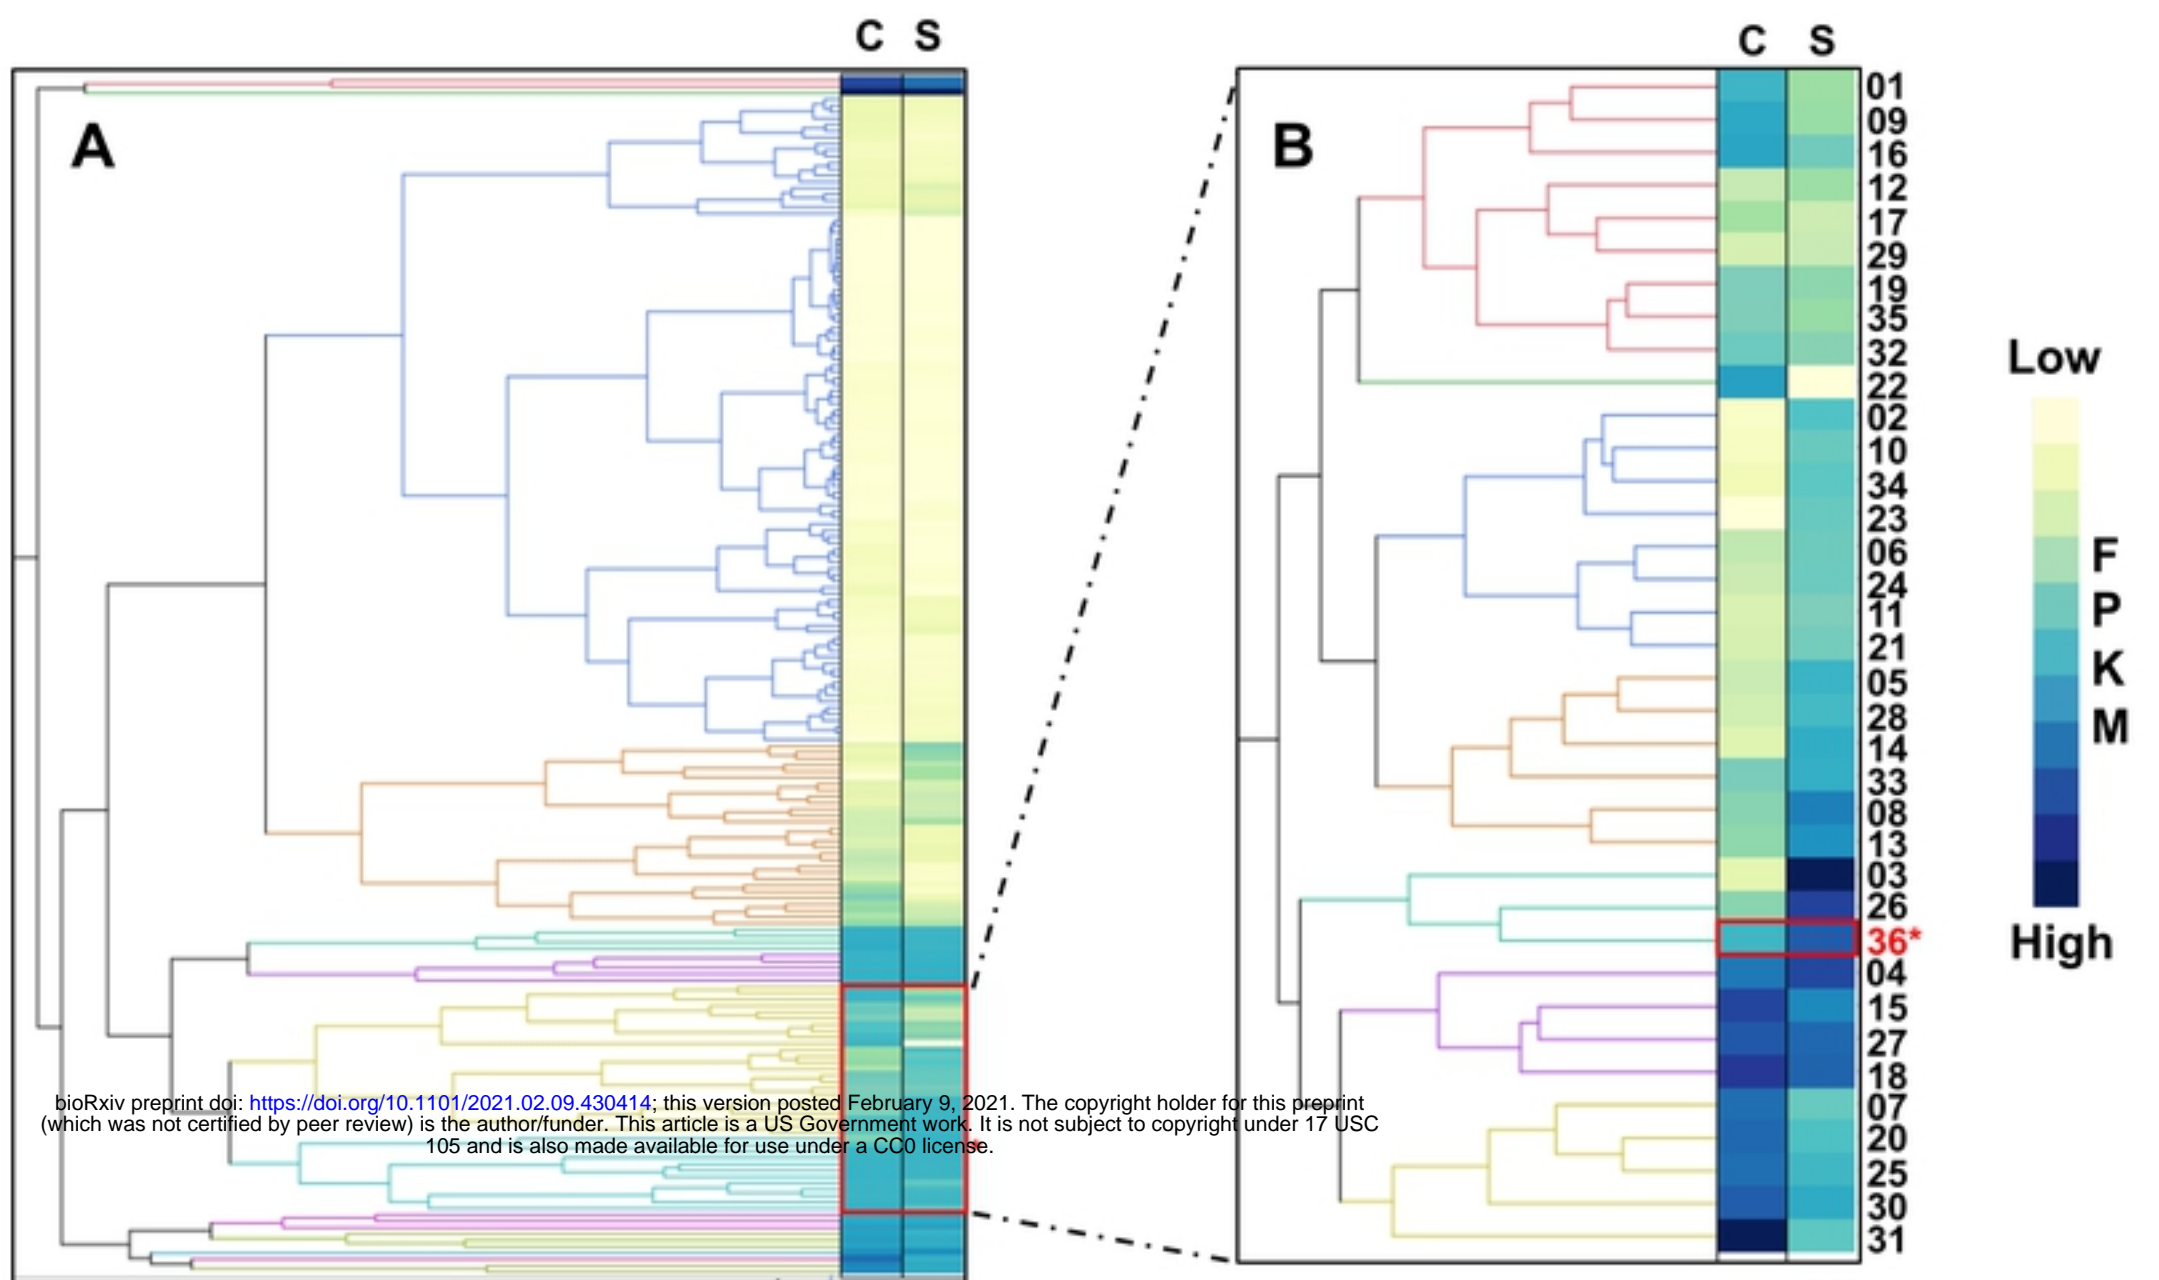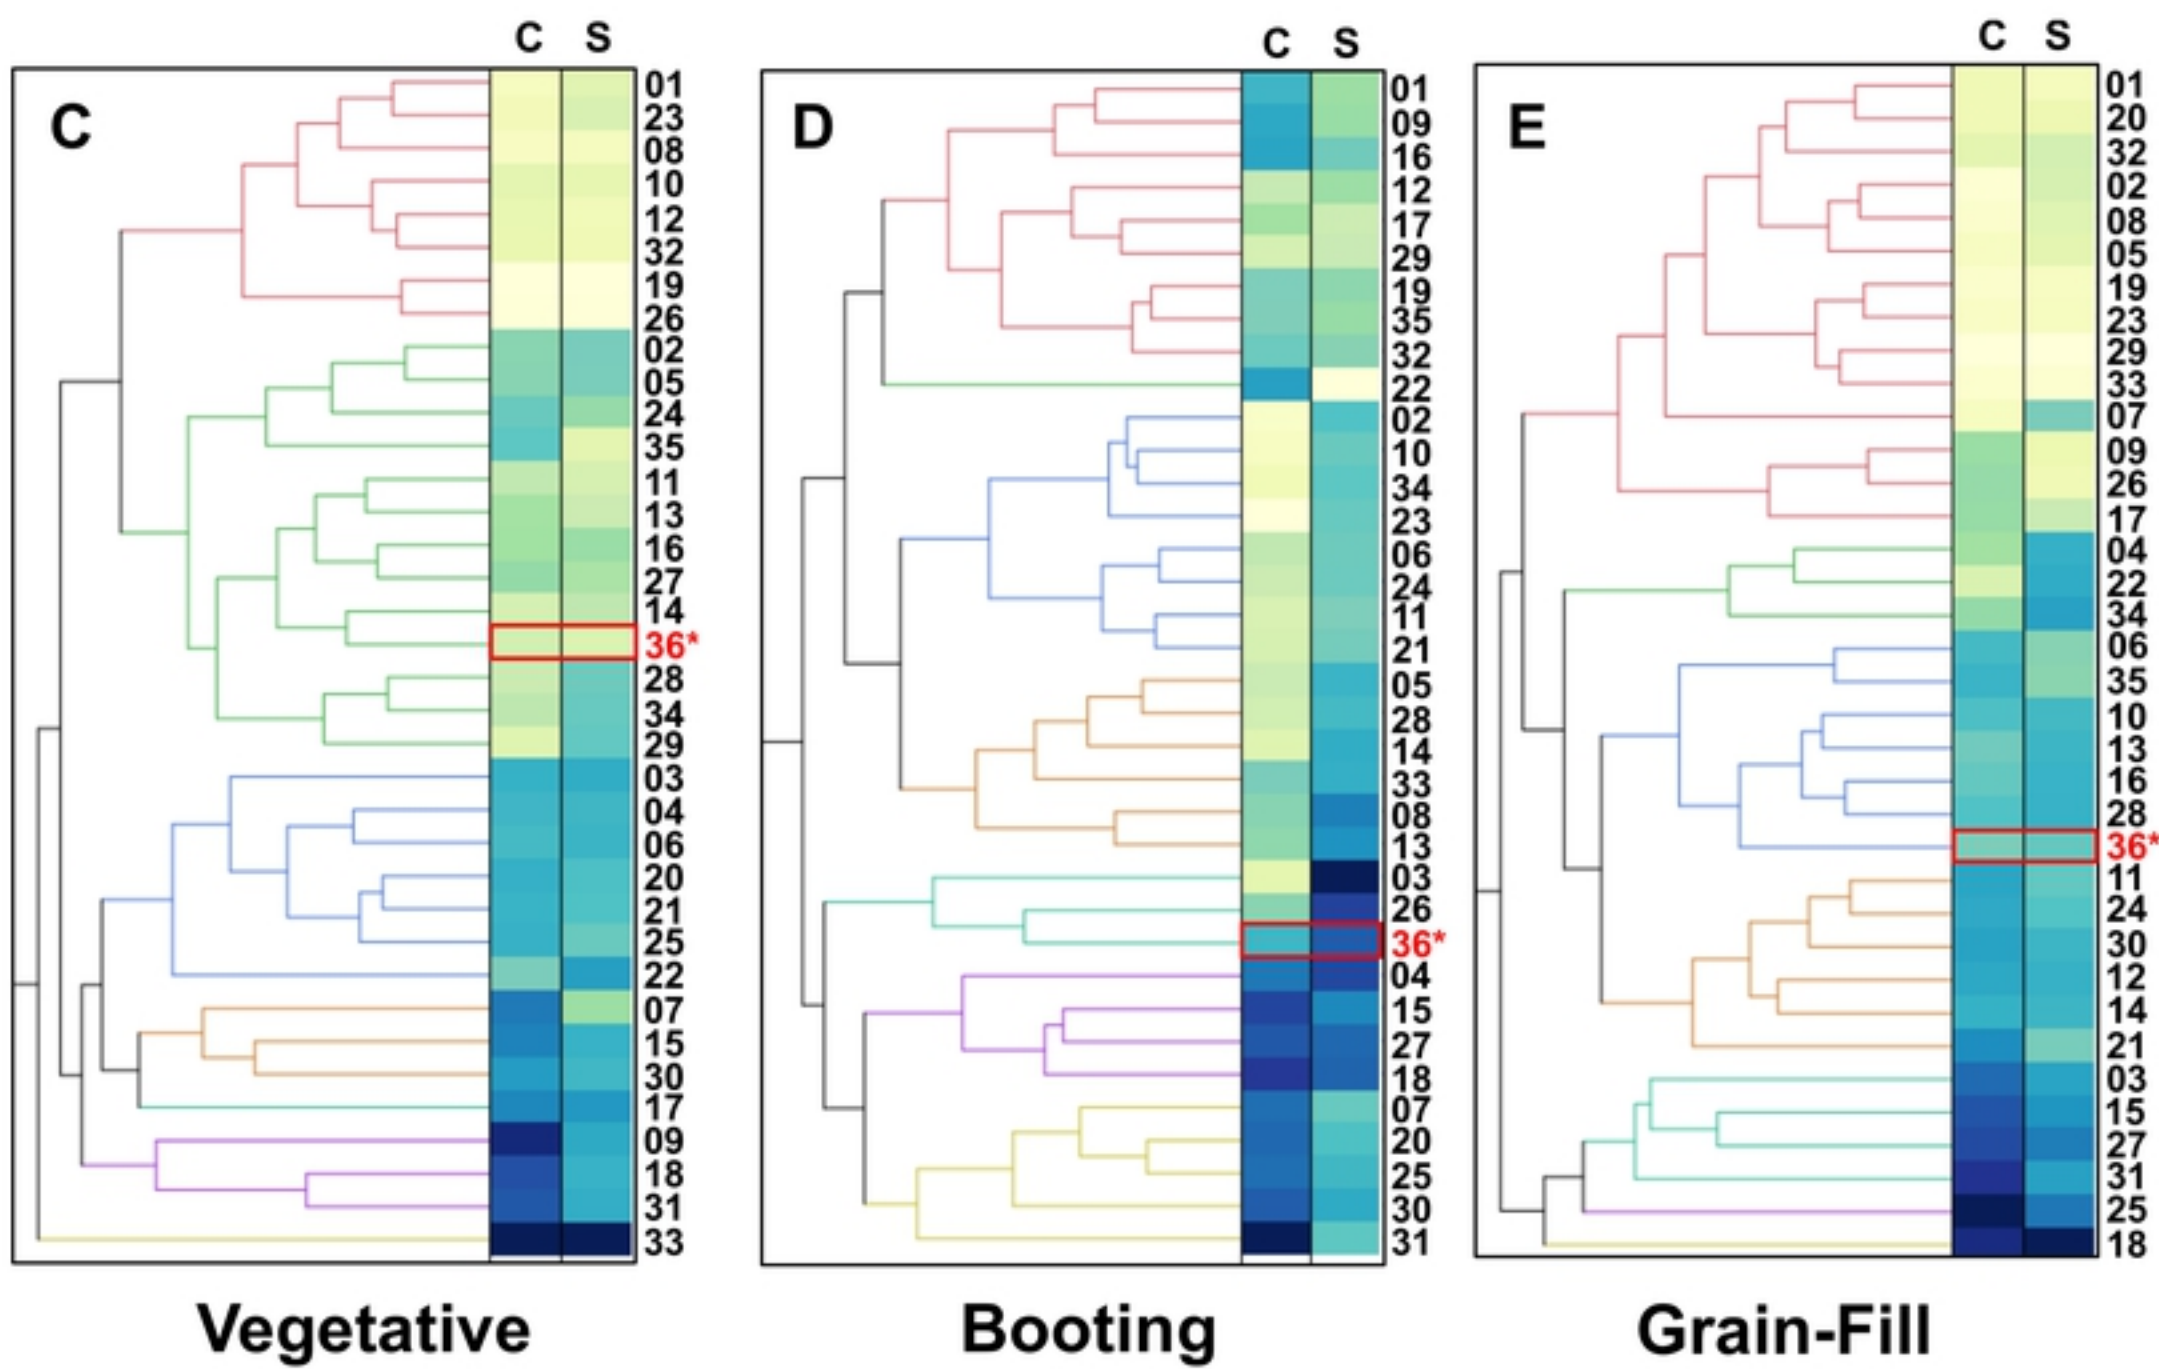

Fig8

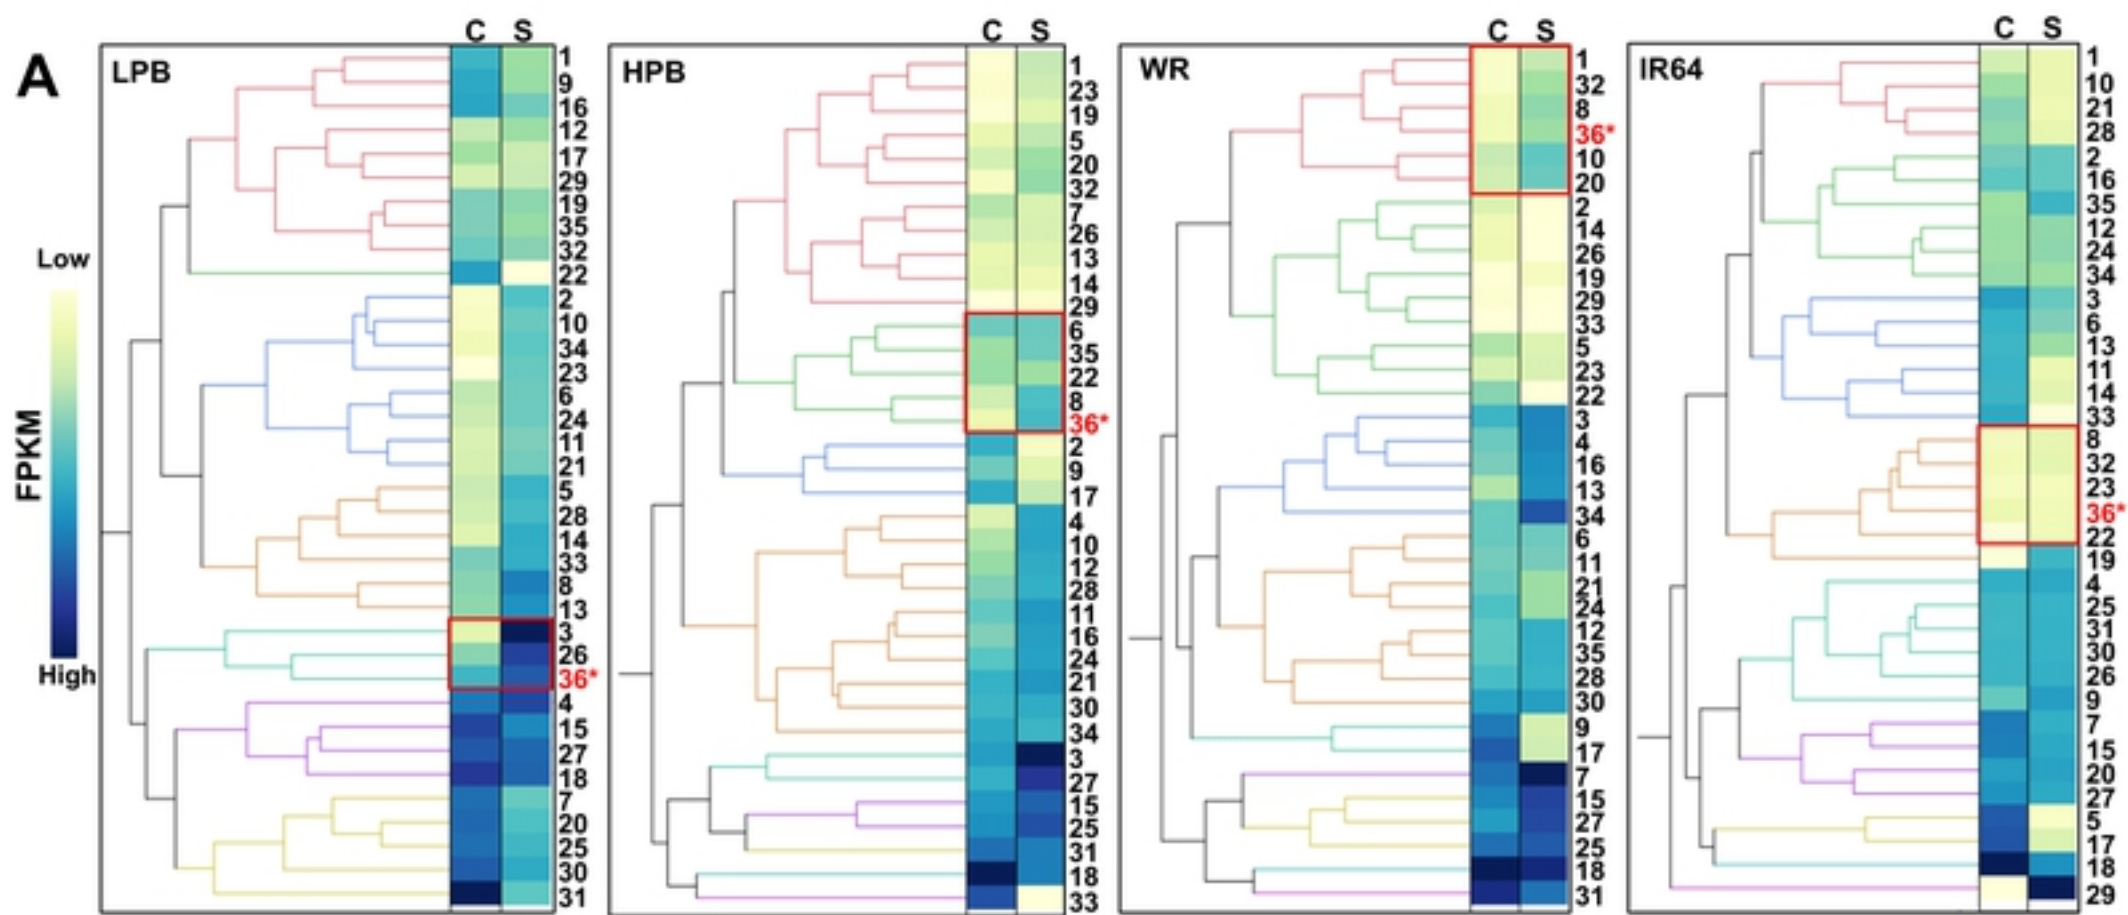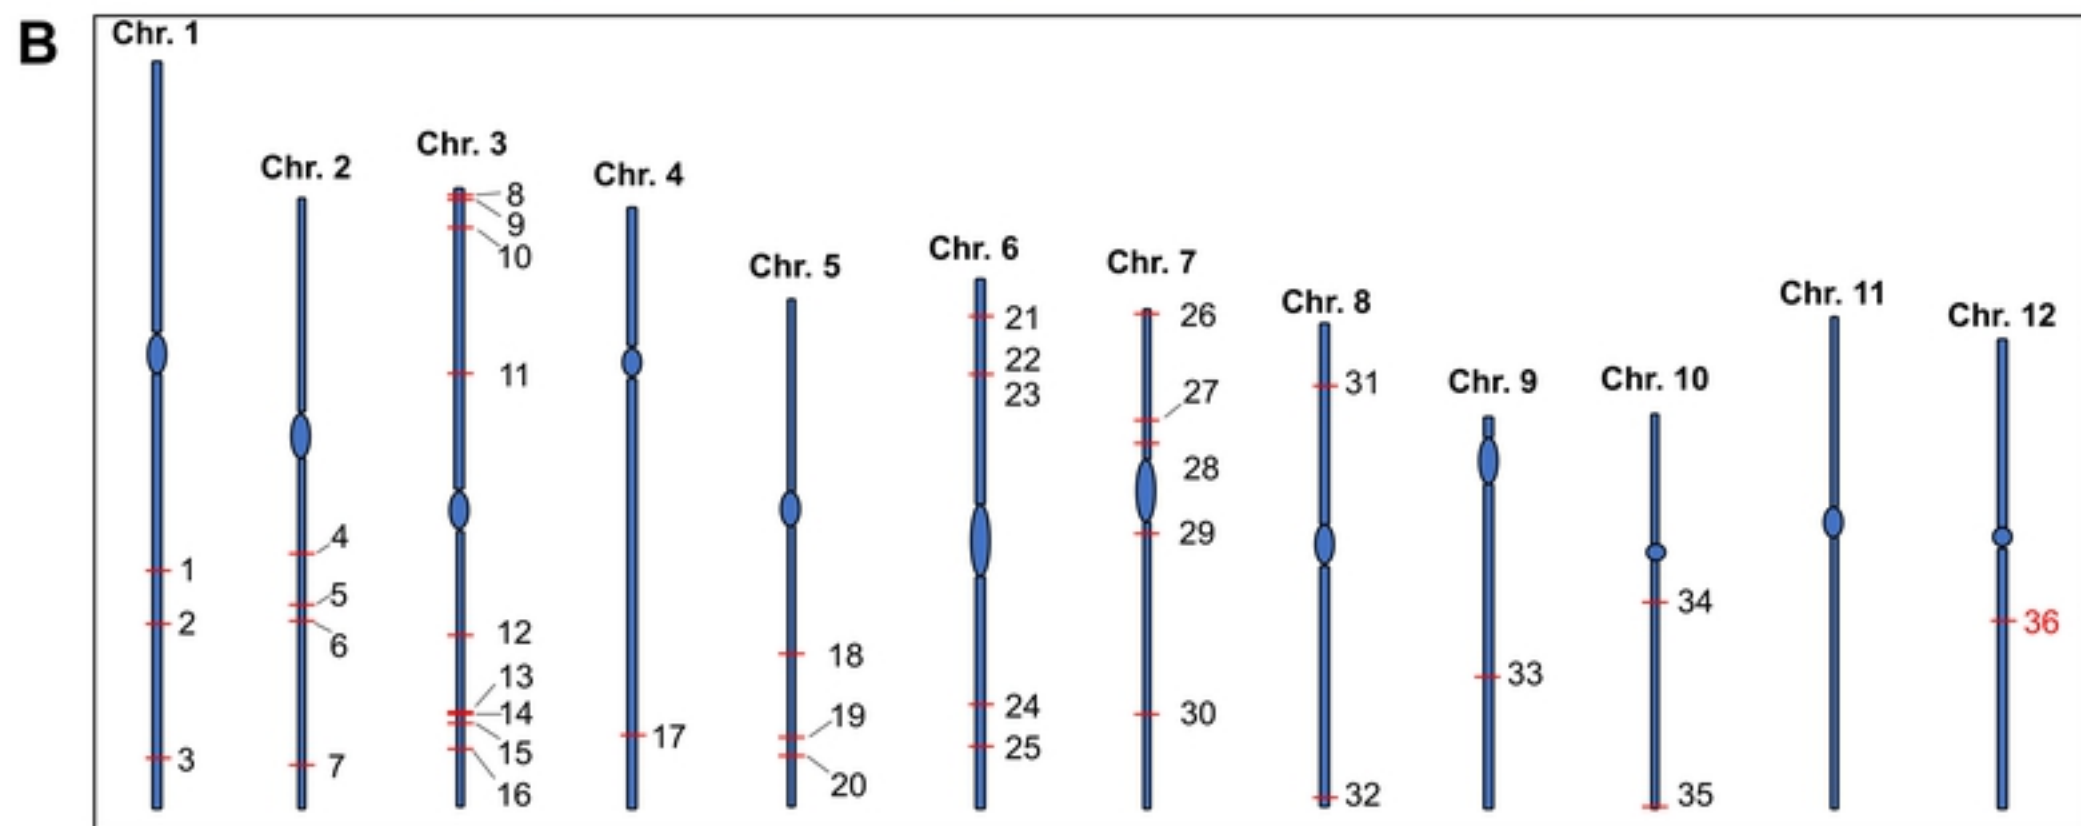

Fig9

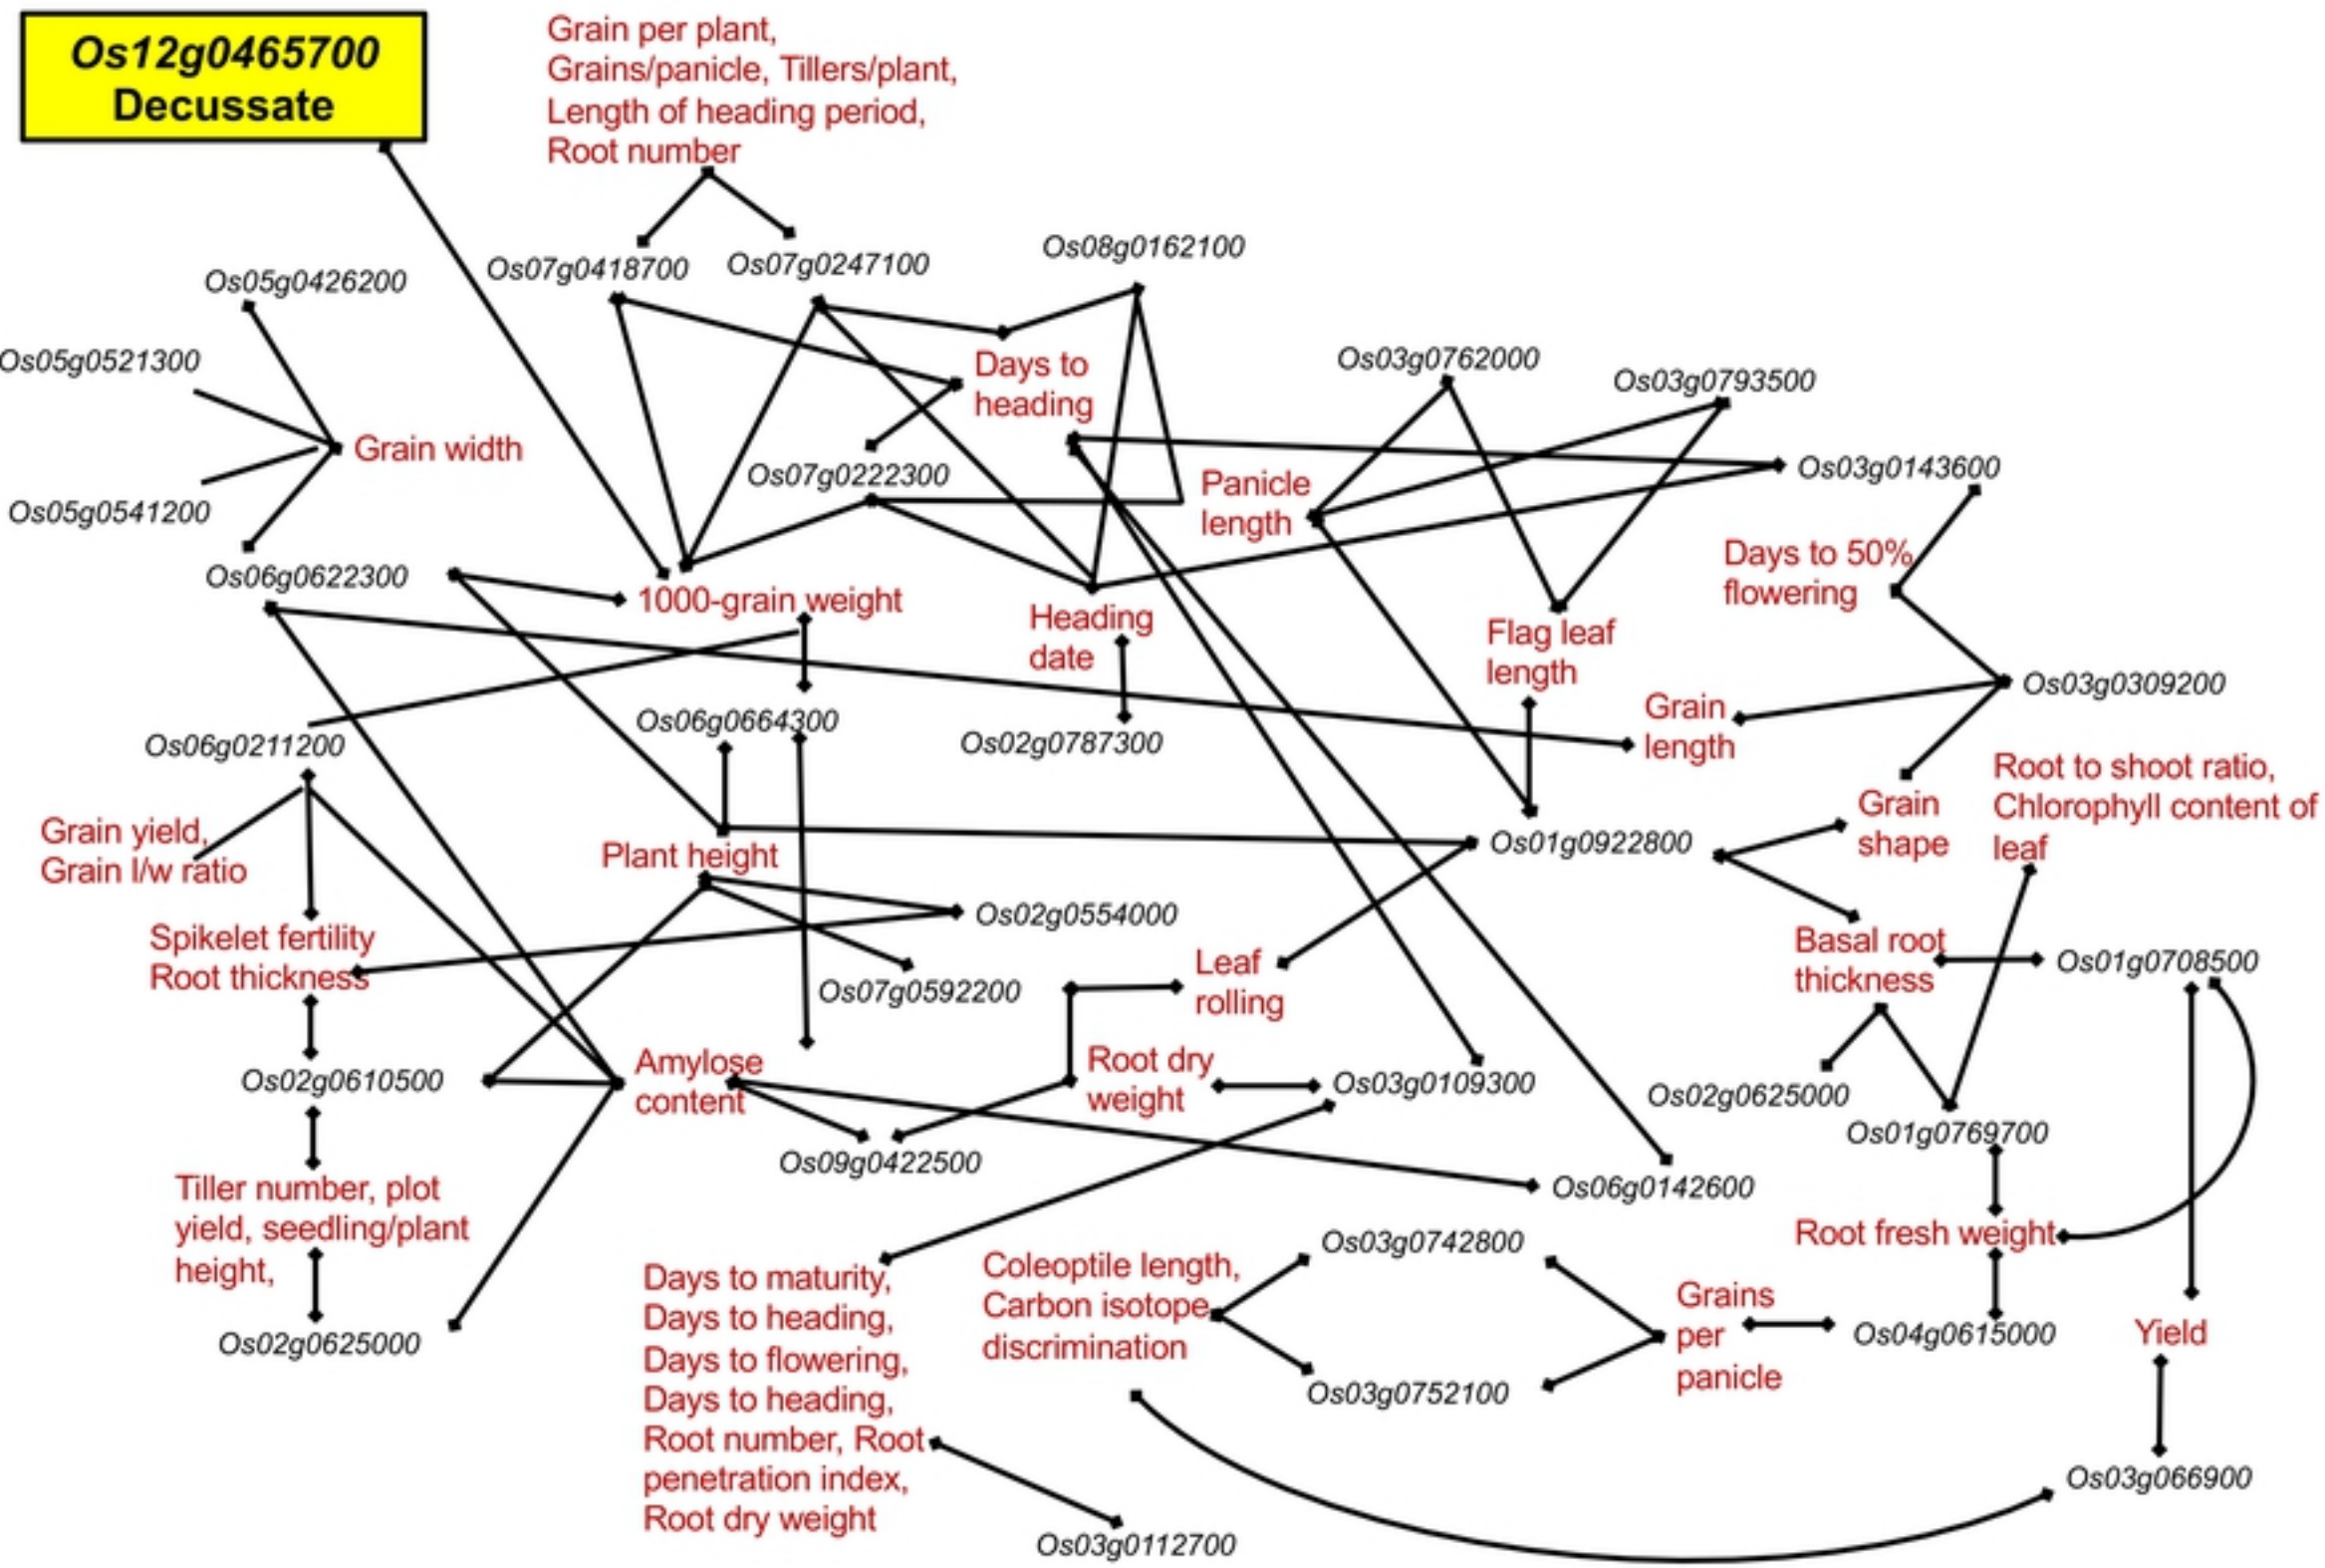

Fig10

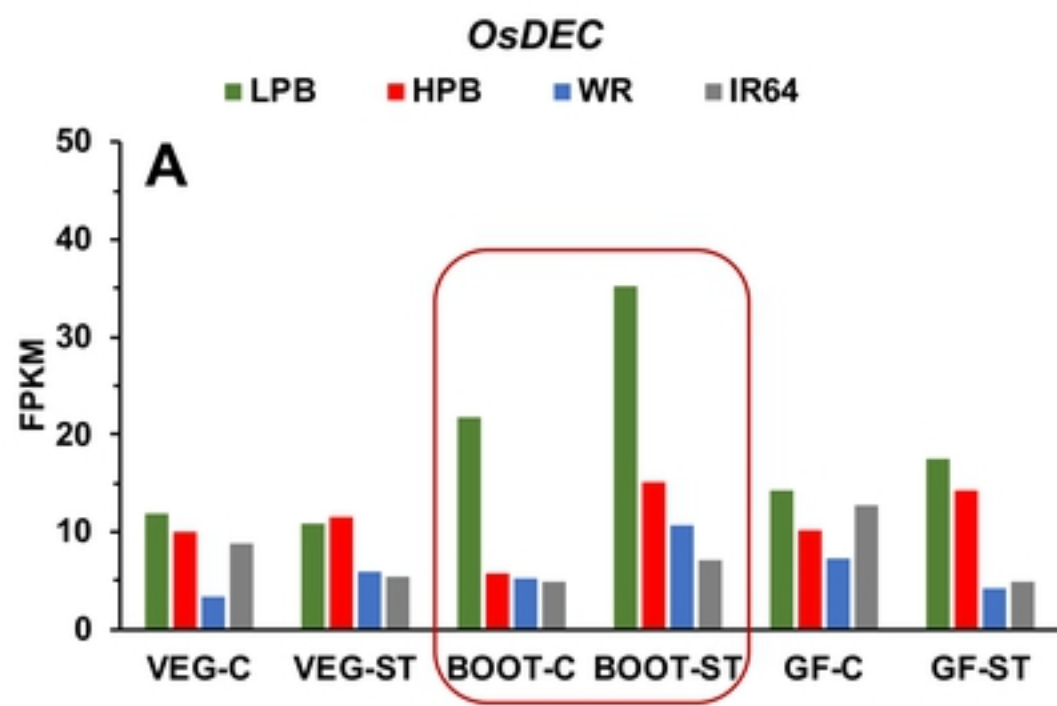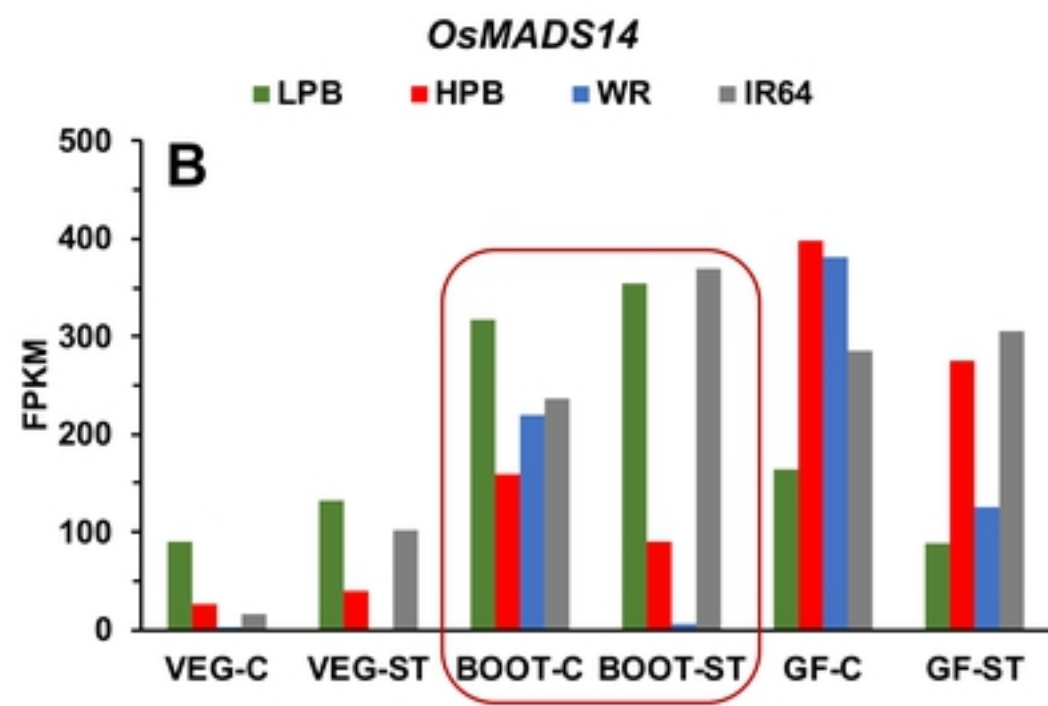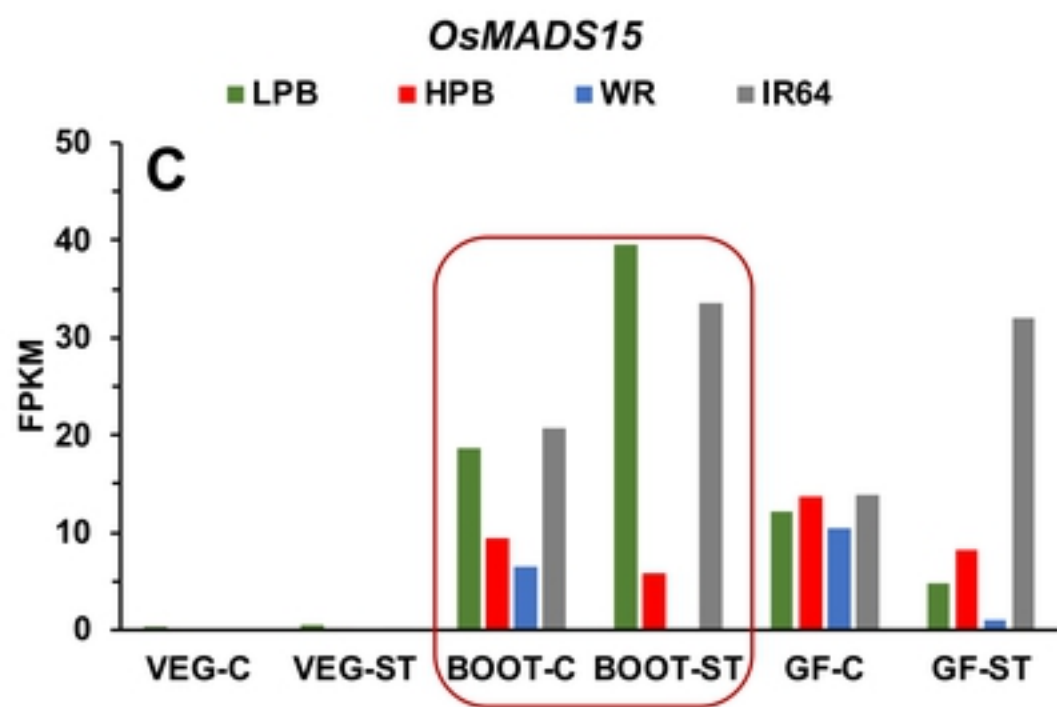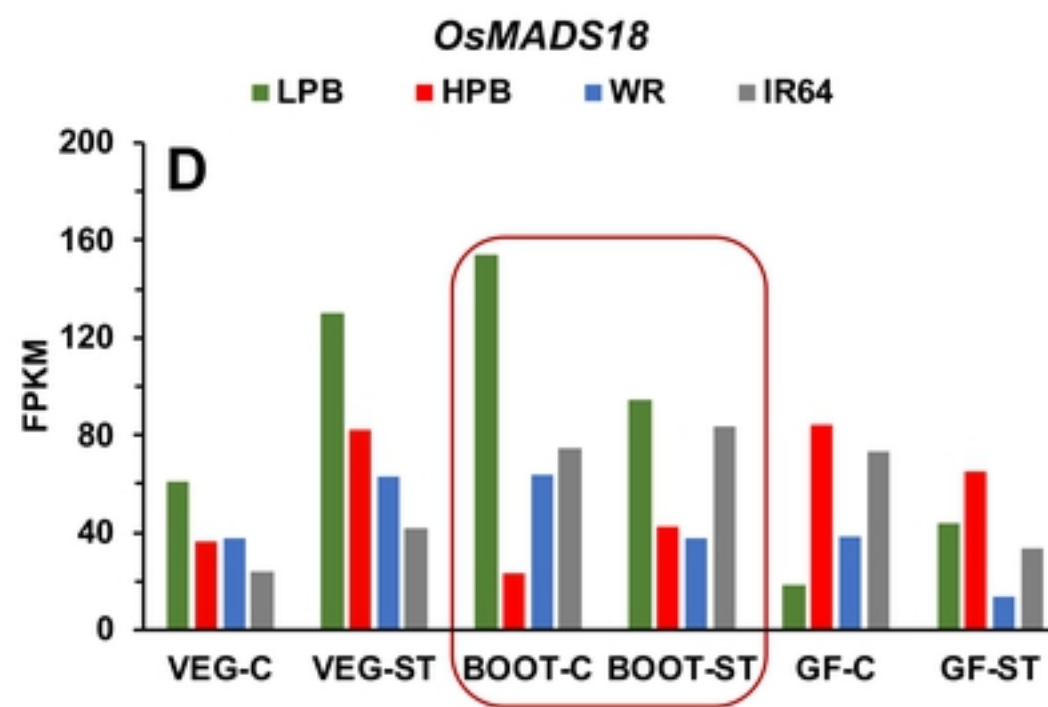

Fig11

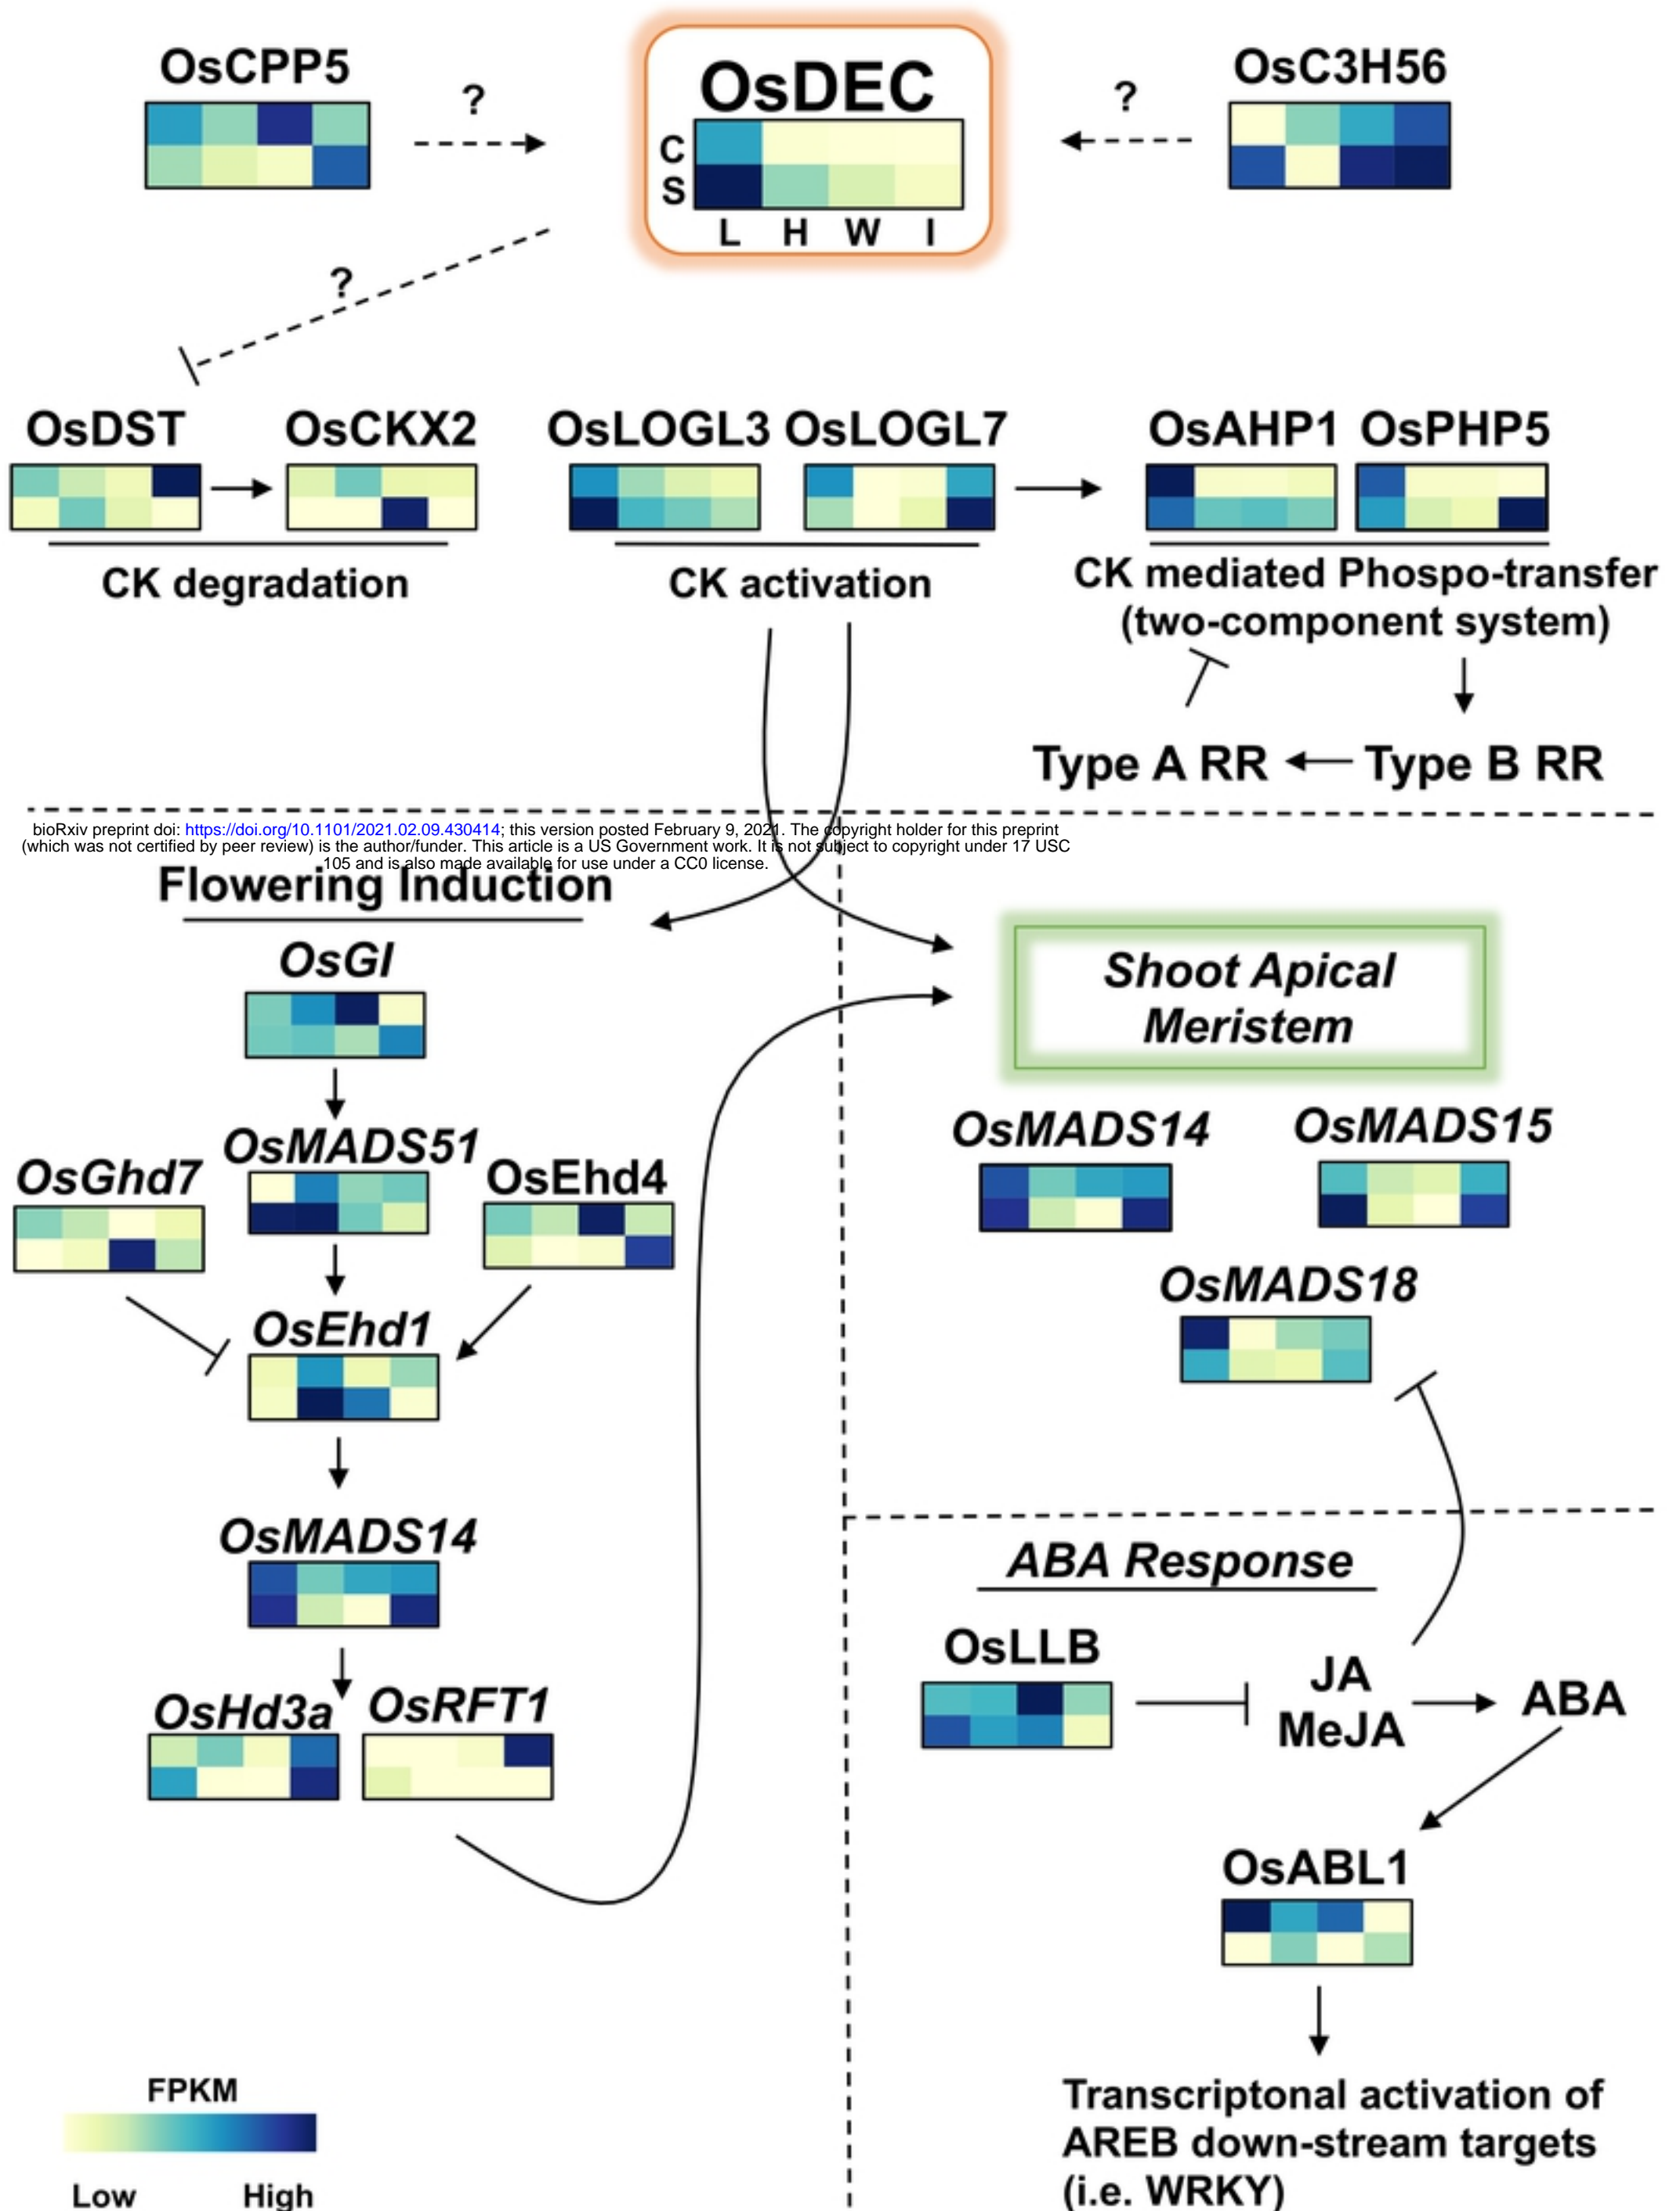

Fig12
